# Supplementary material for: Biogeographic traits of dimethyl sulfide and dimethylsulfoniopropionate cycling in polar oceans
Source: Microbiome. 2021 Oct 16;9:207. doi: 10.1186/s40168-021-01153-3 (PMC8520302; doi:10.1186/s40168-021-01153-3)
Supplement: Supplementary file 3 — Additional file 2: Table S1. Raw abundances of DMS/DMSP related genes in Arctic and Antarctic seawater samples. Table S2. A list of enzymes selected as outgroups for phylogenetic analyses. Table S3. Raw abundances and taxonomic composition of DMS/DMSP related genes in MAGs. Table S4. Raw abundances of DMS/DMSP related genes in Tara Ocean samples. Table S5. Raw abundances of DMS/DMSP related genes in metatranscriptomes. Table S6. The predicted hits with enzymatic activity. Table S7. Biplot scores for constraining variables. Table S8. Taxonomy composition of DMS/DMSP related genes in polar ocean samples. Table S9. Occurrence of DMS/DMSP related genes in genomes from IMG/M database. Table S10. Raw abundances of MTO in metagenomic and metatranscriptomic samples. [file 40168_2021_1153_MOESM3_ESM.xlsx]

## Sheet: Table S1
Table S1 Raw abundances of DMS/DMSP related genes in Arctic and Antarctic seawater samples.
Sample name	Longtitude (°E)	Latitude (°N)	Depth(m)	Group	Raw abundance
					DMS/DMSP related proteins																Reference proteins
					DsyB	MmtN	DddD	DddP	DddK	DddW	DddQ	DddL	DddY	DmdA	DMSOR	Tmm	DsoB	DdhA	DmoA	MddA	COG0012 (NP_415721.1)	COG0016 (NP_416229.1)	COG0018 (NP_416390.1)	COG0172 (NP_415413.1)	COG0215 (NP_415059.1)	COG0495 (NP_415175.1)	COG0525 (NP_418679.1)	COG0533 (NP_417536.1)	COG0541 (NP_417101.1)	COG0552 (NP_417921.1)
N02#G02-7Ar	142.96	75.77	0	Arctic-Surface	1	0	30	25	46	3	3	0	2	83	16	34	8	4	2	2	113	115	27	120	106	237	147	102	108	89
N05#K3-8Ar	12	78.95	0	Arctic-Surface	0	0	49	49	12	0	2	2	0	68	22	24	2	0	2	1	94	81	19	87	79	100	93	69	81	72
N06#UW022-8Ar	-121.22	70.21	0	Arctic-Surface	2	0	62	34	15	4	3	0	0	62	19	12	1	7	3	15	135	118	37	129	121	156	153	125	124	109
N07#UW023-8Ar	-72.46	72.23	0	Arctic-Surface	2	0	56	32	13	3	4	2	0	52	14	18	0	6	3	11	136	116	29	117	128	153	150	117	102	99
N08#N07-0m-8Ar	43.08	85.02	0	Arctic-Surface	2	0	24	45	40	1	6	0	0	101	19	31	2	0	2	1	93	78	15	95	99	189	116	82	87	71
N15#BB08-0m-8Ar	2.34	74.33	0	Arctic-Surface	0	0	65	47	1	2	2	0	0	70	11	17	0	11	6	9	122	110	23	137	125	141	142	124	121	99
N19#AT04-0m-8Ar	4.01	70.2	0	Arctic-Surface	3	0	60	47	1	4	2	0	0	54	18	13	1	15	9	13	149	141	37	153	154	179	161	131	121	105
N20#P06-0m-8Ar	-151.19	75	0	Arctic-Surface	2	0	37	31	44	1	3	0	0	86	13	29	1	0	0	1	89	93	12	86	84	179	93	85	70	76
N22#N04-0m-8Ar	111.08	84.6	0	Arctic-Surface	4	1	45	41	37	5	6	1	0	85	19	31	2	9	4	11	170	145	20	163	157	248	194	145	149	120
N25#N02-0m-8Ar	179.55	80.03	0	Arctic-Surface	2	1	31	34	56	2	5	0	0	84	18	28	1	6	2	5	147	138	13	130	135	272	164	112	117	103
N28#B08-0m-8Ar	176.4	58.1	0	Arctic-Surface	1	1	43	26	58	1	5	0	0	144	24	46	1	3	4	4	145	137	22	141	130	275	152	111	125	117
N38#UW012-0m-8Ar	169.45	52.76	0	Arctic-Surface	1	0	39	16	43	0	5	0	0	101	19	20	0	3	0	2	72	70	16	80	67	130	93	54	61	53
N40#ICE04-0m-9Ar	168.01	82.05	0	Arctic-Surface	3	0	33	24	46	1	4	0	1	91	14	24	2	3	0	2	113	91	17	119	92	197	128	84	100	90
N47#UW024-9Ar	-159.86	74.99	0	Arctic-Surface	4	0	46	25	53	1	10	0	1	176	31	30	5	6	0	7	145	160	23	151	126	212	162	112	136	107
N35#LB01-5m-8Ar	-46.99	56.33	5	Arctic-Surface	0	0	29	13	51	1	5	1	0	130	15	32	0	2	0	0	109	102	17	103	88	169	132	88	91	64
N41#ICE04-100m-9Ar	168.01	82.05	100	Arctic-Surface	4	0	60	88	19	0	4	1	0	146	24	31	1	7	5	3	126	119	13	145	116	162	160	102	124	91
S05#UW048-33An	-89.29	-67.77	0	Antarctic-Surface	1	0	42	14	19	5	3	0	1	67	16	21	7	11	6	6	92	88	26	107	81	157	129	79	94	90
S06#UW051-33An	-112.73	-70.05	0	Antarctic-Surface	0	0	42	33	5	4	4	3	0	31	7	15	8	12	7	8	94	65	27	74	68	94	96	74	75	70
S07#UW056-33An	173.02	-76.96	0	Antarctic-Surface	1	0	47	21	12	5	0	0	0	32	11	12	9	12	3	11	102	78	25	86	78	135	105	92	85	81
S08#UW064-33An	125.22	-64.35	0	Antarctic-Surface	1	0	51	16	38	4	1	0	0	62	20	22	6	10	3	10	136	123	38	132	121	248	141	122	130	107
S09#UW072-33An	70.56	-66.58	0	Antarctic-Surface	1	0	35	14	17	3	2	0	0	59	16	22	4	9	2	8	101	82	29	103	87	147	119	83	88	71
S10#UW073-33An	73.61	-60.01	0	Antarctic-Surface	1	0	53	20	13	4	1	2	0	56	17	19	4	8	6	7	115	99	29	108	100	139	154	100	111	96
S14#A4-07-0m-34An	-115.24	-69.94	0	Antarctic-Surface	0	0	27	43	3	1	2	2	0	46	3	12	4	6	6	9	95	94	25	101	100	103	117	83	104	92
S15#A5-10-0m-34An	-110	-67.02	0	Antarctic-Surface	0	0	20	31	43	1	3	2	0	105	20	30	1	4	5	7	132	117	21	158	129	349	153	114	139	114
S19#A3-09-0m-34An	-120	-68.01	0	Antarctic-Surface	1	0	18	31	49	0	5	1	0	109	13	29	1	2	3	3	151	124	15	152	122	392	157	104	125	109
S30#UW050-0m-34An	-176.62	-58.03	0	Antarctic-Surface	0	0	16	20	70	1	8	1	0	158	15	32	1	0	0	2	156	119	13	148	114	239	156	75	107	84
S31#UW044-0m-34An	-169	-70.75	0	Antarctic-Surface	0	0	22	17	51	3	3	0	1	109	13	34	2	2	0	3	135	118	16	139	126	343	156	105	106	104
S32#UW042-0m-34An	-160.08	-70	0	Antarctic-Surface	0	0	10	12	42	2	3	0	0	76	9	17	2	3	3	4	105	90	10	120	84	262	123	83	92	68
N09#N07-300m-8Ar	43.08	85.02	300	Arctic-Deep	3	0	70	99	7	3	3	1	0	134	26	22	0	9	4	7	143	119	17	169	155	180	178	117	128	104
N13#BB08-300m-8Ar	2.34	74.33	300	Arctic-Deep	4	0	52	64	22	1	6	1	0	126	15	30	0	3	4	4	124	102	21	124	107	153	137	85	105	84
N18#AT04-300m-8Ar	4.01	70.2	300	Arctic-Deep	3	0	33	85	19	2	5	1	0	124	11	35	1	8	5	5	123	111	19	141	125	178	163	115	111	99
N21#P06-300m-8Ar	-151.19	75	300	Arctic-Deep	1	0	66	60	14	1	1	1	0	100	23	20	0	9	7	14	130	135	21	149	130	155	165	121	134	103
N23#N04-300m-8Ar	111.08	84.6	300	Arctic-Deep	2	1	65	66	9	7	3	2	0	72	14	20	3	19	6	23	161	150	35	165	169	185	174	146	136	129
N36#LB01-300m-8Ar	-46.99	56.33	300	Arctic-Deep	0	0	27	39	12	1	3	1	0	86	8	20	1	9	3	12	128	121	24	122	122	147	163	107	102	84
N44#R16E-300m-9Ar	161.52	80	300	Arctic-Deep	4	0	102	97	3	1	4	2	0	113	25	24	4	10	4	3	128	131	7	145	145	165	167	112	130	118
N26#N02-500m-8Ar	179.55	80.03	500	Arctic-Deep	4	0	74	87	14	1	3	2	0	124	31	22	0	8	10	10	147	130	17	170	152	195	185	139	156	127
N10#N07-1000m-8Ar	43.08	85.02	1000	Arctic-Deep	1	0	88	90	6	4	3	1	0	115	26	20	2	12	7	10	153	135	20	175	163	204	197	137	154	114
N12#BB08-1000m-8Ar	2.34	74.33	1000	Arctic-Deep	0	0	20	11	30	3	2	2	0	41	6	14	0	5	1	3	72	68	12	72	72	91	90	68	62	62
N16#AT04-1000m-8Ar	4.01	70.2	1000	Arctic-Deep	1	0	37	14	24	2	3	1	0	115	15	32	0	1	3	2	95	93	27	98	80	127	130	76	85	66
N29#B08-1000m-8Ar	176.4	58.1	1000	Arctic-Deep	2	1	54	40	38	2	6	0	0	126	21	33	2	6	4	7	162	138	25	140	130	254	178	123	149	120
N37#LB01-1000m-8Ar	-46.99	56.33	1000	Arctic-Deep	0	0	52	19	2	1	0	1	0	31	6	6	0	11	4	6	100	108	27	117	98	123	126	93	93	78
N42#ICE04-1000m-9Ar	168.01	82.05	1000	Arctic-Deep	3	0	50	62	29	0	6	0	0	109	25	28	1	7	4	4	126	108	12	128	123	171	166	94	105	80
N45#R16E-1000m-9Ar	161.52	80	1000	Arctic-Deep	2	0	86	76	9	1	3	2	2	96	26	11	6	12	7	5	128	114	15	135	117	162	150	121	118	111
N27#N02-1500m-8Ar	179.55	80.03	1500	Arctic-Deep	2	1	62	43	17	3	2	0	0	62	21	17	3	16	6	22	144	144	31	151	142	187	189	137	135	119
N43#ICE04-2280m-9Ar	168.01	82.05	2280	Arctic-Deep	2	0	23	37	57	1	6	0	1	98	16	34	2	4	2	1	122	124	12	116	130	217	145	105	105	94
N17#AT04-3000m-8Ar	4.01	70.2	3000	Arctic-Deep	4	0	37	78	44	1	9	0	0	226	19	63	0	6	4	1	154	146	26	192	158	231	208	132	158	116
N30#B08-3200m-8Ar	176.4	58.1	3200	Arctic-Deep	2	1	69	38	1	2	3	1	0	49	20	12	5	20	13	35	135	132	29	166	145	183	190	117	139	127
N46#R16E-3236m-9Ar	161.52	80	3236	Arctic-Deep	6	0	60	30	0	2	2	0	2	37	14	2	10	12	10	12	96	95	21	109	102	125	141	93	80	84
N14#BB08-3300m-8Ar	2.34	74.33	3300	Arctic-Deep	3	0	68	75	15	2	4	2	0	105	24	26	0	7	11	4	145	135	31	158	134	173	173	115	136	117
N11#N07-3800m-8Ar	43.08	85.02	3800	Arctic-Deep	3	0	80	49	13	4	5	0	0	70	17	22	2	14	13	13	180	161	32	169	170	204	195	158	155	137
N24#N04-3800m-8Ar	111.08	84.6	3800	Arctic-Deep	0	1	72	79	10	5	4	2	0	81	16	24	4	15	9	17	176	151	29	176	177	212	200	146	160	136
S11#A4-07-300m-34An	-115.24	-69.94	300	Antarctic-Deep	1	0	22	24	31	0	4	0	0	91	16	19	1	3	0	1	109	102	13	110	91	215	136	83	109	85
S16#A5-10-300m-34An	-110	-67.02	300	Antarctic-Deep	2	0	52	82	9	1	5	0	0	110	14	27	2	10	6	4	118	127	37	139	143	165	164	115	127	92
S20#A3-09-300m-34An	-120	-68.01	300	Antarctic-Deep	2	0	83	87	6	0	6	0	0	127	18	30	2	10	3	11	123	144	38	158	160	171	166	143	151	108
S12#A4-07-1000m-34An	-115.24	-69.94	1000	Antarctic-Deep	1	0	56	92	15	0	6	0	0	136	13	26	1	7	3	7	138	134	20	158	141	189	195	118	140	95
S17#A5-10-1000m-34An	-110	-67.02	1000	Antarctic-Deep	2	0	82	106	9	1	5	1	0	155	18	42	4	11	8	7	148	155	30	165	159	218	199	143	155	121
S21#A3-09-1000m-34An	-120	-68.01	1000	Antarctic-Deep	0	0	59	76	9	0	3	0	0	93	13	34	2	9	8	8	121	117	24	138	133	155	154	113	135	103
S13#A4-07-3000m-34An	-115.24	-69.94	3000	Antarctic-Deep	1	0	48	78	5	0	6	0	0	107	12	33	2	9	1	5	134	106	24	132	134	169	182	103	131	85
S18#A5-10-3500m-34An	-110	-67.02	3500	Antarctic-Deep	0	0	68	93	6	0	3	1	0	93	15	28	3	8	10	8	135	131	29	137	140	183	165	130	143	114
S22#A3-09-3500m-34An	-120	-68.01	3500	Antarctic-Deep	0	0	42	51	6	1	3	1	0	63	11	15	3	6	11	10	120	114	36	125	126	136	157	108	126	106

## Sheet: Table S2
Table S2. A list of enzymes selected as outgroups for phylogenetic analyses.
ID	Family	Protein characterization	Accession number
non-DmdA	Glycine cleavage system T family	aminomethyltransferase	WP_011962992.1
			WP_011877095.1
			WP_011576319.1
non-DddD	Class III acetyl CoA-transferase family	CoA transferase	KAE8411072.1
			KAB8275298.1
non-Tmm	Class B flavoprotein monooxygenases	Baeyer-Villiger monooxygenase	BAA24454.1
			Q47PU3.1
			CAD10798
non-DddP	M24B metallopeptidase family	Creatinase	AIO31051.1
			P38488.2
			WP_020594441.1
non-DddK	Cupin family	Cupin	WP_003303793.1
			PAU78823.1
			WP_004230043.1

## Sheet: Table S3
Table S3 Raw abundances and taxonomic composition of DMS/DMSP related genes in MAGs.
Genome ID	Raw abundance
	DsyB	MmtN	DddD	DddP	DddK	DddW	DddQ	DddL	DddY	DmdA	DMSOR	Tmm	DsoB	DdhA	DmoA	MddA	Classification(domian_;phylum_;class_;order_;famliy_;genus_;species_;)
Genome_001	0	0	1	0	0	0	0	0	0	0	0	0	0	0	0	0	d__Bacteria;p__Proteobacteria;c__Alphaproteobacteria;o__Caulobacterales;f__Hyphomonadaceae;g__Hyphomonas;s__
Genome_002	0	0	0	0	0	0	0	0	0	0	0	0	0	0	0	0	d__Bacteria;p__Proteobacteria;c__Alphaproteobacteria;o__;f__;g__;s__
Genome_003	0	0	0	0	0	0	0	0	0	0	0	0	0	0	0	0	d__Bacteria;p__Proteobacteria;c__Alphaproteobacteria;o__Paracaedibacterales;f__UBA11393;g__UBA11393;s__UBA11393 sp002791835
Genome_004	0	0	0	0	0	0	0	0	0	0	0	0	0	1	0	0	d__Bacteria;p__Proteobacteria;c__Alphaproteobacteria;o__Caulobacterales;f__Maricaulaceae;g__Oceanicaulis;s__
Genome_005	0	0	1	1	0	1	0	0	0	0	1	0	0	0	0	0	d__Bacteria;p__Proteobacteria;c__Alphaproteobacteria;o__Rhodobacterales;f__Rhodobacteraceae;g__EhC02;s__
Genome_006	0	0	1	0	0	0	0	0	0	0	0	0	0	0	0	0	d__Bacteria;p__Proteobacteria;c__Alphaproteobacteria;o__Caulobacterales;f__Caulobacteraceae;g__Phenylobacterium;s__Phenylobacterium sp002363865
Genome_007	0	0	0	0	0	0	0	0	0	0	0	0	0	0	0	0	d__Bacteria;p__Verrucomicrobiota_A;c__Chlamydiia;o__Parachlamydiales;f__SM23-39;g__;s__
Genome_008	0	0	0	0	0	0	0	0	0	1	0	0	0	0	0	1	d__Bacteria;p__Proteobacteria;c__Gammaproteobacteria;o__UBA10353;f__UBA7415;g__UBA7415;s__
Genome_009	0	0	1	0	0	0	0	0	0	0	0	0	0	1	0	1	d__Bacteria;p__Proteobacteria;c__Alphaproteobacteria;o__Caulobacterales;f__Caulobacteraceae;g__Brevundimonas;s__Brevundimonas sp002341585
Genome_010	0	0	0	0	0	0	0	0	0	3	0	0	0	0	0	0	d__Bacteria;p__Proteobacteria;c__Alphaproteobacteria;o__Pelagibacterales;f__AG-422-B15;g__;s__
Genome_011	0	0	2	0	0	0	0	0	0	3	1	0	0	0	0	0	d__Bacteria;p__Proteobacteria;c__Alphaproteobacteria;o__Puniceispirillales;f__AAA536-G10;g__;s__
Genome_012	0	0	6	0	0	0	0	0	0	0	0	0	0	0	0	0	d__Bacteria;p__Proteobacteria;c__Alphaproteobacteria;o__Reyranellales;f__Reyranellaceae;g__;s__
Genome_013	0	0	1	0	0	0	0	0	0	0	0	0	0	1	0	1	d__Bacteria;p__Proteobacteria;c__Alphaproteobacteria;o__Caulobacterales;f__Parvularculaceae;g__Marinicaulis;s__
Genome_014	0	0	0	0	0	0	0	0	0	0	0	0	0	1	0	0	d__Bacteria;p__Proteobacteria;c__Alphaproteobacteria;o__Micavibrionales;f__Micavibrionaceae;g__UBA2638;s__
Genome_015	0	0	0	0	0	0	0	0	0	0	0	0	0	0	0	1	d__Bacteria;p__Proteobacteria;c__Alphaproteobacteria;o__Caulobacterales;f__Parvularculaceae;g__Marinicaulis;s__
Genome_016	0	0	1	0	0	0	0	0	0	0	0	0	0	0	0	0	d__Bacteria;p__Proteobacteria;c__Alphaproteobacteria;o__Micavibrionales;f__Micavibrionaceae;g__Micavibrio_B;s__
Genome_017	0	0	1	1	0	1	0	0	0	0	1	0	0	0	0	0	d__Bacteria;p__Proteobacteria;c__Alphaproteobacteria;o__Rhodobacterales;f__Rhodobacteraceae;g__EhC02;s__
Genome_018	0	0	2	0	0	0	0	0	0	0	0	0	0	0	0	0	d__Bacteria;p__Proteobacteria;c__Alphaproteobacteria;o__Rhodobacterales;f__Rhodobacteraceae;g__Limimaricola;s__Limimaricola cinnabarinus
Genome_019	0	0	0	2	0	0	0	0	0	2	0	1	0	0	0	0	d__Bacteria;p__Proteobacteria;c__Alphaproteobacteria;o__Rhodobacterales;f__Rhodobacteraceae;g__Planktomarina;s__
Genome_020	0	0	2	1	0	0	0	0	0	3	1	1	0	0	0	0	d__Bacteria;p__Proteobacteria;c__Alphaproteobacteria;o__Rhodobacterales;f__Rhodobacteraceae;g__Planktomarina;s__
Genome_021	0	0	0	2	0	0	0	0	0	3	0	0	0	0	0	0	d__Bacteria;p__Proteobacteria;c__Alphaproteobacteria;o__Rhodobacterales;f__Rhodobacteraceae;g__Planktomarina;s__
Genome_022	0	0	2	0	0	0	0	0	0	4	1	1	0	0	0	0	d__Bacteria;p__Proteobacteria;c__Alphaproteobacteria;o__Rhodobacterales;f__Rhodobacteraceae;g__HIMB11;s__HIMB11 sp002336405
Genome_023	0	0	0	1	0	0	0	0	0	3	1	0	0	0	0	0	d__Bacteria;p__Proteobacteria;c__Alphaproteobacteria;o__Rhodobacterales;f__Rhodobacteraceae;g__HIMB11;s__
Genome_024	0	0	1	2	0	0	1	0	0	4	1	1	0	0	0	0	d__Bacteria;p__Proteobacteria;c__Alphaproteobacteria;o__Rhodobacterales;f__Rhodobacteraceae;g__HIMB11;s__HIMB11 sp001642945
Genome_025	0	0	3	1	0	0	0	0	0	0	0	0	0	0	0	0	d__Bacteria;p__Proteobacteria;c__Alphaproteobacteria;o__Rhodospirillales_A;f__Casp-alpha2;g__Casp-alpha2;s__Casp-alpha2 sp002938315
Genome_026	0	0	3	2	0	0	0	0	0	1	2	0	0	0	0	0	d__Bacteria;p__Proteobacteria;c__Alphaproteobacteria;o__Rhodospirillales_A;f__UBA2165;g__GCA-2712665;s__GCA-2712665 sp002938035
Genome_027	1	0	2	0	0	0	0	0	0	0	0	0	0	0	0	0	d__Bacteria;p__Proteobacteria;c__Alphaproteobacteria;o__Rhodospirillales_A;f__;g__;s__
Genome_028	0	0	3	0	0	0	0	0	0	0	0	0	0	0	0	0	d__Bacteria;p__Proteobacteria;c__Alphaproteobacteria;o__Rhodospirillales_A;f__2-12-FULL-67-15;g__;s__
Genome_029	0	0	4	0	0	0	0	0	0	3	0	0	0	0	0	0	d__Bacteria;p__Proteobacteria;c__Alphaproteobacteria;o__Rhodospirillales_A;f__UBA4479;g__UBA4479;s__
Genome_030	0	0	7	1	0	0	0	0	0	1	1	0	0	0	0	0	d__Bacteria;p__Proteobacteria;c__Alphaproteobacteria;o__;f__;g__;s__
Genome_031	0	0	1	2	0	0	0	0	0	2	4	0	0	0	0	0	d__Bacteria;p__Proteobacteria;c__Alphaproteobacteria;o__Rhodospirillales_A;f__UBA2165;g__GCA-2712665;s__GCA-2712665 sp002938035
Genome_032	0	0	5	0	0	0	0	0	0	0	0	0	0	1	0	0	d__Bacteria;p__Proteobacteria;c__Alphaproteobacteria;o__Rhizobiales;f__Xanthobacteraceae;g__Ga0077548;s__
Genome_033	0	0	0	0	0	0	0	0	0	0	0	0	0	0	0	1	d__Bacteria;p__Proteobacteria;c__Alphaproteobacteria;o__Sphingomonadales;f__Sphingomonadaceae;g__Novosphingobium_A;s__
Genome_034	0	0	0	0	0	0	0	0	0	0	0	0	0	0	0	1	d__Bacteria;p__Proteobacteria;c__Alphaproteobacteria;o__Sphingomonadales;f__Sphingomonadaceae;g__Novosphingobium_A;s__
Genome_035	0	0	0	0	0	0	0	0	0	0	0	0	0	0	0	1	d__Bacteria;p__Proteobacteria;c__Alphaproteobacteria;o__Sphingomonadales;f__Sphingomonadaceae;g__Novosphingobium_A;s__
Genome_036	0	0	4	0	0	0	0	0	0	0	0	0	0	0	0	0	d__Bacteria;p__Proteobacteria;c__Alphaproteobacteria;o__Sphingomonadales;f__Sphingomonadaceae;g__Porphyrobacter;s__Porphyrobacter sp001724215
Genome_037	0	0	0	0	0	0	0	0	0	0	0	0	0	0	0	0	d__Bacteria;p__Proteobacteria;c__Gammaproteobacteria;o__Burkholderiales;f__Burkholderiaceae;g__Limnobacter;s__Limnobacter sp002954425
Genome_038	0	0	0	0	0	0	0	0	0	0	0	0	1	0	0	0	d__Bacteria;p__Proteobacteria;c__Gammaproteobacteria;o__Burkholderiales;f__Burkholderiaceae;g__Limnobacter;s__Limnobacter sp002954425
Genome_039	0	0	0	0	0	0	0	0	0	0	0	0	1	0	0	0	d__Bacteria;p__Proteobacteria;c__Gammaproteobacteria;o__Burkholderiales;f__Burkholderiaceae;g__Limnobacter;s__Limnobacter sp002954425
Genome_040	0	0	3	0	0	0	0	0	0	0	0	0	0	0	0	0	d__Bacteria;p__Proteobacteria;c__Gammaproteobacteria;o__Burkholderiales;f__Burkholderiaceae;g__RS62;s__RS62 sp000496475
Genome_041	0	0	5	0	0	0	0	0	0	0	0	0	0	1	0	0	d__Bacteria;p__Proteobacteria;c__Gammaproteobacteria;o__Burkholderiales;f__Burkholderiaceae;g__Rubrivivax;s__
Genome_042	0	0	3	0	0	0	0	0	0	0	0	0	0	1	0	0	d__Bacteria;p__Proteobacteria;c__Gammaproteobacteria;o__Burkholderiales;f__Burkholderiaceae;g__Hydrogenophaga;s__Hydrogenophaga sp002840835
Genome_043	0	0	1	0	0	0	0	0	0	0	0	0	0	0	0	0	d__Bacteria;p__Proteobacteria;c__Gammaproteobacteria;o__Burkholderiales;f__Burkholderiaceae;g__RS62;s__
Genome_044	0	0	2	0	0	0	0	0	0	0	0	0	0	0	1	0	d__Bacteria;p__Proteobacteria;c__Gammaproteobacteria;o__Burkholderiales;f__Burkholderiaceae;g__Massilia_B;s__
Genome_045	0	0	2	1	0	0	0	0	0	2	1	1	0	0	0	0	d__Bacteria;p__SAR324;c__SAR324;o__SAR324;f__NAC60-12;g__UBA8110;s__UBA8110 sp002707655
Genome_046	0	0	0	1	0	0	0	0	0	1	0	1	0	0	0	0	d__Bacteria;p__SAR324;c__SAR324;o__SAR324;f__NAC60-12;g__Arctic96AD-7;s__Arctic96AD-7 sp002082305
Genome_047	0	0	0	0	0	0	0	0	0	0	0	0	0	0	0	0	d__Bacteria;p__SAR324;c__SAR324;o__SAR324;f__NAC60-12;g__Arctic96AD-7;s__Arctic96AD-7 sp002082305
Genome_048	0	0	1	0	0	0	0	0	0	0	0	0	0	1	0	0	d__Bacteria;p__Proteobacteria;c__Gammaproteobacteria;o__Pseudomonadales;f__Cellvibrionaceae;g__Cellvibrio;s__
Genome_049	0	0	1	0	0	0	0	0	0	0	0	0	0	0	0	0	d__Bacteria;p__Proteobacteria;c__Gammaproteobacteria;o__Pseudomonadales;f__Alcanivoracaceae;g__PGZG01;s__
Genome_050	0	0	0	0	0	0	0	0	0	0	0	0	0	0	0	0	d__Bacteria;p__Proteobacteria;c__Gammaproteobacteria;o__Methylococcales;f__Methylomonadaceae;g__OPU3-GD-OMZ;s__
Genome_051	0	0	0	0	0	0	0	0	0	0	0	0	0	0	0	0	d__Bacteria;p__Proteobacteria;c__Gammaproteobacteria;o__Enterobacterales;f__Alteromonadaceae;g__Alteromonas;s__Alteromonas mediterranea
Genome_052	0	0	1	0	0	0	0	0	0	1	0	0	0	0	0	0	d__Bacteria;p__Proteobacteria;c__Gammaproteobacteria;o__Pseudomonadales;f__Halieaceae;g__Halioglobus;s__
Genome_053	0	0	3	0	0	0	0	0	0	2	0	0	0	0	0	0	d__Bacteria;p__Proteobacteria;c__Gammaproteobacteria;o__Pseudomonadales;f__Porticoccaceae;g__HTCC2207;s__
Genome_054	0	0	0	0	0	0	0	0	0	0	0	0	0	0	0	0	d__Bacteria;p__Proteobacteria;c__Gammaproteobacteria;o__Xanthomonadales;f__Xanthomonadaceae;g__Arenimonas;s__
Genome_055	0	0	0	0	0	0	0	0	0	1	0	0	0	0	0	1	d__Bacteria;p__Proteobacteria;c__Gammaproteobacteria;o__Pseudomonadales;f__Pseudohongiellaceae;g__UBA9145;s__UBA9145 sp002731775
Genome_056	0	0	1	0	0	0	0	0	0	0	0	0	0	1	0	0	d__Bacteria;p__Proteobacteria;c__Gammaproteobacteria;o__Pseudomonadales;f__Oleiphilaceae;g__;s__
Genome_057	0	0	1	0	0	0	0	0	0	0	0	0	0	1	0	0	d__Bacteria;p__Proteobacteria;c__Gammaproteobacteria;o__Pseudomonadales;f__Oleiphilaceae;g__;s__
Genome_058	0	0	0	0	0	0	0	0	0	0	0	0	0	1	0	0	d__Bacteria;p__Proteobacteria;c__Gammaproteobacteria;o__Enterobacterales;f__Alteromonadaceae;g__Rheinheimera;s__
Genome_059	0	0	2	0	0	0	0	0	0	1	0	0	0	0	0	0	d__Bacteria;p__Proteobacteria;c__Gammaproteobacteria;o__Pseudomonadales;f__Halieaceae;g__Halioglobus;s__
Genome_060	0	0	0	0	0	0	0	0	0	0	0	0	0	0	0	0	d__Bacteria;p__Proteobacteria;c__Gammaproteobacteria;o__Coxiellales;f__Coxiellaceae;g__GCA-2732805;s__
Genome_061	0	0	1	0	0	0	0	0	0	0	0	0	0	0	0	0	d__Bacteria;p__Proteobacteria;c__Gammaproteobacteria;o__Pseudomonadales;f__Moraxellaceae;g__;s__
Genome_062	0	0	4	0	0	0	0	0	0	3	0	0	0	0	0	0	d__Bacteria;p__Proteobacteria;c__Gammaproteobacteria;o__Pseudomonadales;f__Halieaceae;g__Luminiphilus;s__
Genome_063	0	0	3	0	0	0	0	0	0	3	0	0	0	0	0	1	d__Bacteria;p__Proteobacteria;c__Gammaproteobacteria;o__Pseudomonadales;f__Halieaceae;g__Luminiphilus;s__
Genome_064	0	0	7	0	0	0	0	0	0	0	1	0	0	0	0	0	d__Bacteria;p__Proteobacteria;c__Gammaproteobacteria;o__Pseudomonadales;f__Porticoccaceae;g__;s__
Genome_065	0	0	0	0	0	0	0	0	0	0	0	0	0	0	0	0	d__Bacteria;p__Proteobacteria;c__Gammaproteobacteria;o__Enterobacterales;f__;g__;s__
Genome_066	0	0	2	0	0	0	0	0	0	2	0	0	0	0	0	0	d__Bacteria;p__Proteobacteria;c__Gammaproteobacteria;o__Pseudomonadales;f__Porticoccaceae;g__HTCC2207;s__
Genome_067	0	0	4	0	0	0	0	0	0	3	0	0	0	0	0	0	d__Bacteria;p__Proteobacteria;c__Gammaproteobacteria;o__Pseudomonadales;f__Halieaceae;g__Luminiphilus;s__
Genome_068	0	0	2	0	0	0	0	0	0	0	0	0	0	0	0	0	d__Bacteria;p__Proteobacteria;c__Gammaproteobacteria;o__Pseudomonadales;f__Porticoccaceae;g__TMED48;s__
Genome_069	0	0	0	0	0	0	0	0	0	0	0	0	0	0	0	0	d__Bacteria;p__Proteobacteria;c__Gammaproteobacteria;o__Enterobacterales;f__Alteromonadaceae;g__Pseudoalteromonas;s__Pseudoalteromonas marina
Genome_070	0	0	0	0	0	0	0	0	0	0	0	0	0	0	0	0	d__Bacteria;p__Proteobacteria;c__Gammaproteobacteria;o__Pseudomonadales;f__Cellvibrionaceae;g__Saccharophagus;s__Saccharophagus degradans
Genome_071	0	0	1	0	0	0	0	0	0	0	0	0	0	0	0	0	d__Bacteria;p__Proteobacteria;c__Gammaproteobacteria;o__Pseudomonadales;f__Spongiibacteraceae;g__Zhongshania;s__Zhongshania sp002915595
Genome_072	0	0	10	0	0	0	0	0	0	0	1	0	0	0	0	0	d__Bacteria;p__Proteobacteria;c__Gammaproteobacteria;o__Pseudomonadales;f__HTCC2089;g__UBA4421;s__
Genome_073	0	0	3	0	0	0	0	0	0	1	0	0	0	0	0	0	d__Bacteria;p__Proteobacteria;c__Gammaproteobacteria;o__Pseudomonadales;f__Porticoccaceae;g__HTCC2207;s__
Genome_074	0	0	1	0	0	0	0	0	0	0	0	0	1	1	0	0	d__Bacteria;p__Proteobacteria;c__Gammaproteobacteria;o__Pseudomonadales;f__Oleiphilaceae;g__Marinobacter;s__Marinobacter sp001447155
Genome_075	0	0	0	0	0	0	0	0	0	0	0	0	0	0	0	0	d__Bacteria;p__Proteobacteria;c__Gammaproteobacteria;o__Enterobacterales;f__Alteromonadaceae;g__Arsukibacterium;s__Arsukibacterium perlucida
Genome_076	0	0	0	0	0	0	0	0	0	0	0	0	0	0	0	0	d__Bacteria;p__Proteobacteria;c__Gammaproteobacteria;o__Pseudomonadales;f__Pseudohongiellaceae;g__UBA5109;s__UBA5109 sp002414385
Genome_077	0	0	1	0	0	0	0	0	0	0	0	0	0	0	0	0	d__Bacteria;p__Proteobacteria;c__Gammaproteobacteria;o__Pseudomonadales;f__Pseudohongiellaceae;g__Pseudohongiella;s__
Genome_078	0	0	0	0	0	0	0	0	0	0	0	0	0	0	0	0	d__Bacteria;p__Proteobacteria;c__Gammaproteobacteria;o__Pseudomonadales;f__Pseudohongiellaceae;g__UBA5109;s__
Genome_079	0	0	2	0	0	0	0	0	0	0	0	0	0	0	0	0	d__Bacteria;p__Proteobacteria;c__Gammaproteobacteria;o__Pseudomonadales;f__Spongiibacteraceae;g__UBA5047;s__UBA5047 sp002415025
Genome_080	0	0	1	0	0	0	0	0	0	0	0	0	0	0	0	0	d__Bacteria;p__Proteobacteria;c__Gammaproteobacteria;o__Pseudomonadales;f__Alcanivoracaceae;g__PGZG01;s__
Genome_081	0	0	0	0	0	0	0	0	0	0	0	0	0	0	0	0	d__Bacteria;p__Proteobacteria;c__Gammaproteobacteria;o__Pseudomonadales;f__Porticoccaceae;g__BRH-c0;s__
Genome_082	0	0	0	0	0	0	0	0	0	0	0	0	0	0	0	0	d__Bacteria;p__Proteobacteria;c__Gammaproteobacteria;o__Enterobacterales;f__Alteromonadaceae;g__Colwellia;s__Colwellia sp003061515
Genome_083	0	0	1	0	0	0	0	0	0	0	0	0	0	0	0	0	d__Bacteria;p__Proteobacteria;c__Gammaproteobacteria;o__Pseudomonadales;f__Spongiibacteraceae;g__Zhongshania;s__Zhongshania sp002915595
Genome_084	0	0	0	0	0	0	0	0	0	0	0	0	0	0	0	0	d__Bacteria;p__Proteobacteria;c__Gammaproteobacteria;o__Enterobacterales;f__Alteromonadaceae;g__Rheinheimera;s__
Genome_085	0	0	0	0	0	0	0	0	0	0	0	0	0	0	0	0	d__Bacteria;p__Proteobacteria;c__Gammaproteobacteria;o__Pseudomonadales;f__Pseudomonadaceae;g__Pseudomonas_D;s__
Genome_086	0	0	0	0	0	0	0	0	0	0	0	0	0	0	0	0	d__Bacteria;p__Proteobacteria;c__Gammaproteobacteria;o__Pseudomonadales;f__Spongiibacteraceae;g__Zhongshania;s__Zhongshania aliphaticivorans
Genome_087	0	0	1	0	0	0	0	0	0	0	0	0	0	0	0	0	d__Bacteria;p__Proteobacteria;c__Gammaproteobacteria;o__Pseudomonadales;f__Moraxellaceae;g__;s__
Genome_088	0	0	0	0	0	0	0	0	0	0	0	0	0	0	0	0	d__Bacteria;p__Proteobacteria;c__Gammaproteobacteria;o__Enterobacterales;f__Alteromonadaceae;g__Idiomarina;s__
Genome_089	0	0	1	0	0	0	0	0	0	0	0	0	0	0	0	0	d__Bacteria;p__Proteobacteria;c__Gammaproteobacteria;o__Pseudomonadales;f__Moraxellaceae;g__;s__
Genome_090	0	0	3	0	0	0	0	0	0	1	0	0	0	0	0	0	d__Bacteria;p__Proteobacteria;c__Gammaproteobacteria;o__Pseudomonadales;f__Porticoccaceae;g__HTCC2207;s__
Genome_091	0	0	0	0	0	0	0	0	0	0	0	0	0	0	0	0	d__Bacteria;p__Proteobacteria;c__Gammaproteobacteria;o__Coxiellales;f__Coxiellaceae;g__2-02-FULL-42-43;s__
Genome_092	0	0	1	0	0	0	0	0	0	0	0	0	0	0	0	0	d__Bacteria;p__Proteobacteria;c__Gammaproteobacteria;o__Nevskiales;f__;g__;s__
Genome_093	0	0	0	0	0	0	0	0	0	0	0	0	0	0	0	1	d__Bacteria;p__Proteobacteria;c__Gammaproteobacteria;o__Xanthomonadales;f__Xanthomonadaceae;g__Arenimonas;s__
Genome_094	0	0	0	0	0	0	0	0	0	0	0	0	0	0	0	0	d__Bacteria;p__Proteobacteria;c__Gammaproteobacteria;o__Enterobacterales;f__Alteromonadaceae;g__Rheinheimera;s__
Genome_095	0	0	0	0	0	0	0	0	0	0	0	1	0	0	0	0	d__Bacteria;p__Proteobacteria;c__Gammaproteobacteria;o__Pseudomonadales;f__Halomonadaceae;g__Cobetia;s__Cobetia amphilecti
Genome_096	0	0	0	0	0	0	0	0	0	1	0	0	0	0	0	0	d__Bacteria;p__Proteobacteria;c__Gammaproteobacteria;o__Pseudomonadales;f__Pseudohongiellaceae;g__UBA9145;s__UBA9145 sp002731775
Genome_097	0	0	0	0	0	0	0	0	0	0	0	0	0	0	0	0	d__Bacteria;p__Proteobacteria;c__Gammaproteobacteria;o__Pseudomonadales;f__Moraxellaceae;g__;s__
Genome_098	0	0	0	0	0	0	0	0	0	0	0	0	0	0	0	0	d__Bacteria;p__Proteobacteria;c__Gammaproteobacteria;o__Enterobacterales;f__Alteromonadaceae;g__Colwellia;s__
Genome_099	0	0	5	0	0	0	0	0	0	0	0	0	0	0	0	0	d__Bacteria;p__Proteobacteria;c__Gammaproteobacteria;o__Pseudomonadales;f__Pseudohongiellaceae;g__UBA9145;s__
Genome_100	0	0	0	0	0	0	0	0	0	0	0	0	0	0	0	0	d__Bacteria;p__Proteobacteria;c__Gammaproteobacteria;o__Enterobacterales;f__Alteromonadaceae;g__Alteromonas;s__Alteromonas naphthalenivorans
Genome_101	0	0	0	0	0	0	0	0	0	0	0	0	0	0	0	0	d__Bacteria;p__Proteobacteria;c__Gammaproteobacteria;o__Enterobacterales;f__Alteromonadaceae;g__Pseudoalteromonas;s__Pseudoalteromonas aliena
Genome_102	0	0	8	0	0	0	0	0	0	1	0	0	0	0	0	0	d__Bacteria;p__Proteobacteria;c__Gammaproteobacteria;o__Pseudomonadales;f__HTCC2089;g__UBA11889;s__UBA11889 sp002313255
Genome_103	0	0	1	0	0	0	0	0	0	0	0	0	0	0	0	0	d__Bacteria;p__Proteobacteria;c__Gammaproteobacteria;o__Pseudomonadales;f__Pseudohongiellaceae;g__OM182;s__OM182 sp001438145
Genome_104	0	0	1	0	0	0	0	0	0	0	0	0	1	1	0	0	d__Bacteria;p__Proteobacteria;c__Gammaproteobacteria;o__Pseudomonadales;f__Oleiphilaceae;g__Marinobacter;s__Marinobacter sp001447155
Genome_105	0	0	1	0	0	0	0	0	0	0	0	0	0	1	0	1	d__Bacteria;p__Proteobacteria;c__Gammaproteobacteria;o__Pseudomonadales;f__Oleiphilaceae;g__;s__
Genome_106	0	0	2	0	0	0	0	0	0	0	0	0	0	0	0	0	d__Bacteria;p__Proteobacteria;c__Gammaproteobacteria;o__Pseudomonadales;f__Pseudohongiellaceae;g__UBA9145;s__
Genome_107	0	0	0	0	0	0	0	0	0	0	0	0	0	0	0	0	d__Bacteria;p__Proteobacteria;c__Gammaproteobacteria;o__Pseudomonadales;f__Cellvibrionaceae;g__Marinagarivorans;s__
Genome_108	0	0	1	0	0	0	0	0	0	0	0	0	0	0	0	0	d__Bacteria;p__Proteobacteria;c__Gammaproteobacteria;o__Pseudomonadales;f__Spongiibacteraceae;g__;s__
Genome_109	0	0	0	0	0	0	0	0	0	0	0	0	0	0	0	0	d__Bacteria;p__Proteobacteria;c__Gammaproteobacteria;o__Coxiellales;f__Coxiellaceae;g__;s__
Genome_110	0	0	1	0	0	0	0	0	0	0	0	0	0	0	0	0	d__Bacteria;p__Proteobacteria;c__Gammaproteobacteria;o__Pseudomonadales;f__Spongiibacteraceae;g__Zhongshania;s__Zhongshania sp002915595
Genome_111	0	0	0	0	0	0	0	0	0	0	0	0	0	0	0	0	d__Bacteria;p__Proteobacteria;c__Gammaproteobacteria;o__Enterobacterales;f__Alteromonadaceae;g__Alteromonas_A;s__
Genome_112	0	0	0	0	0	0	0	0	0	0	0	0	0	0	0	0	d__Bacteria;p__Proteobacteria;c__Gammaproteobacteria;o__Pseudomonadales;f__Cellvibrionaceae;g__Saccharophagus;s__Saccharophagus degradans
Genome_113	0	0	0	0	0	0	0	0	0	0	0	0	0	0	0	0	d__Bacteria;p__Proteobacteria;c__Gammaproteobacteria;o__Enterobacterales;f__Alteromonadaceae;g__Rheinheimera;s__
Genome_114	0	0	0	0	0	0	0	0	0	0	0	0	0	0	0	0	d__Bacteria;p__Proteobacteria;c__Gammaproteobacteria;o__Enterobacterales;f__Alteromonadaceae;g__Pseudoalteromonas;s__Pseudoalteromonas marina
Genome_115	0	0	0	0	0	0	0	0	0	0	0	0	0	0	0	0	d__Bacteria;p__Verrucomicrobiota;c__Verrucomicrobiae;o__Opitutales;f__Opitutaceae;g__UBA6669;s__
Genome_116	0	0	5	0	0	0	0	0	0	0	0	0	0	0	0	0	d__Bacteria;p__Proteobacteria;c__Gammaproteobacteria;o__Pseudomonadales;f__Pseudohongiellaceae;g__UBA9145;s__
Genome_117	0	0	0	0	0	0	0	0	0	0	0	0	0	1	0	0	d__Bacteria;p__Proteobacteria;c__Gammaproteobacteria;o__Methylococcales;f__Methylomonadaceae;g__;s__
Genome_118	0	0	0	0	0	0	0	0	0	0	1	0	0	1	0	0	d__Bacteria;p__Proteobacteria;c__Gammaproteobacteria;o__Immundisolibacterales;f__Immundisolibacteraceae;g__Immundisolibacter;s__
Genome_119	0	0	0	0	0	0	0	0	0	0	0	0	0	0	1	0	d__Bacteria;p__Proteobacteria;c__Gammaproteobacteria;o__Pseudomonadales;f__Moraxellaceae;g__Acinetobacter;s__Acinetobacter johnsonii
Genome_120	0	0	1	0	0	0	0	0	0	0	0	0	0	0	1	0	d__Bacteria;p__Proteobacteria;c__Gammaproteobacteria;o__Pseudomonadales;f__Moraxellaceae;g__Acinetobacter;s__Acinetobacter junii
Genome_121	0	0	0	0	0	0	0	0	0	0	0	0	0	1	0	0	d__Bacteria;p__Proteobacteria;c__Gammaproteobacteria;o__Xanthomonadales;f__Xanthomonadaceae;g__;s__
Genome_122	0	0	1	0	0	0	0	0	0	0	1	0	0	0	0	0	d__Bacteria;p__Proteobacteria;c__Gammaproteobacteria;o__Immundisolibacterales;f__Immundisolibacteraceae;g__Immundisolibacter;s__
Genome_123	0	0	0	0	0	0	0	0	0	0	0	1	0	0	3	0	d__Bacteria;p__Proteobacteria;c__Gammaproteobacteria;o__Pseudomonadales;f__Pseudomonadaceae;g__Pseudomonas_E;s__Pseudomonas_E sp002255865
Genome_124	0	0	7	2	0	0	0	0	0	2	0	0	0	0	0	0	d__Bacteria;p__Proteobacteria;c__Gammaproteobacteria;o__UBA10353;f__LS-SOB;g__UBA11791;s__UBA11791 sp002714255
Genome_125	0	0	0	1	0	0	0	0	0	8	1	1	0	0	0	0	d__Bacteria;p__Proteobacteria;c__Gammaproteobacteria;o__Pseudomonadales;f__Nitrincolaceae;g__ASP10-02a;s__ASP10-02a sp002335115
Genome_126	0	0	2	4	0	0	0	0	0	3	0	1	0	0	0	0	d__Bacteria;p__Proteobacteria;c__Gammaproteobacteria;o__Pseudomonadales;f__Nitrincolaceae;g__ASP10-02a;s__
Genome_127	0	0	2	1	0	0	0	0	0	3	0	1	0	0	0	0	d__Bacteria;p__Proteobacteria;c__Gammaproteobacteria;o__Pseudomonadales;f__Nitrincolaceae;g__ASP10-02a;s__
Genome_128	0	0	1	1	0	0	0	0	0	4	0	1	0	0	0	0	d__Bacteria;p__Proteobacteria;c__Gammaproteobacteria;o__Pseudomonadales;f__Nitrincolaceae;g__ASP10-02a;s__
Genome_129	0	0	2	0	0	0	0	0	0	5	0	1	0	0	0	0	d__Bacteria;p__Proteobacteria;c__Gammaproteobacteria;o__Pseudomonadales;f__Nitrincolaceae;g__ASP10-02a;s__
Genome_130	0	0	1	1	0	0	0	0	0	3	0	1	0	0	0	0	d__Bacteria;p__Proteobacteria;c__Gammaproteobacteria;o__Pseudomonadales;f__Nitrincolaceae;g__ASP10-02a;s__
Genome_131	0	0	1	0	0	0	0	0	0	0	0	0	0	0	0	0	d__Bacteria;p__Proteobacteria;c__Gammaproteobacteria;o__Pseudomonadales;f__Moraxellaceae;g__Psychrobacter;s__Psychrobacter pacificensis
Genome_132	0	0	0	0	0	0	0	0	0	0	0	0	0	0	0	0	d__Bacteria;p__Proteobacteria;c__Gammaproteobacteria;o__Pseudomonadales;f__Pseudomonadaceae;g__Pseudomonas_E;s__Pseudomonas_E peli
Genome_133	0	0	0	0	0	0	0	0	0	1	0	0	0	0	0	0	d__Bacteria;p__Bacteroidota;c__Bacteroidia;o__Flavobacteriales;f__Flavobacteriaceae;g__HC6-5;s__
Genome_134	0	0	0	0	0	0	0	0	0	1	0	0	0	0	0	0	d__Bacteria;p__Bacteroidota;c__Bacteroidia;o__Flavobacteriales;f__Flavobacteriaceae;g__Leeuwenhoekiella;s__
Genome_135	0	0	0	0	0	0	0	0	0	1	0	0	0	0	0	0	d__Bacteria;p__Bacteroidota;c__Bacteroidia;o__Flavobacteriales;f__Flavobacteriaceae;g__Croceibacter;s__Croceibacter atlanticus
Genome_136	0	0	0	0	0	0	0	0	0	1	0	0	0	0	0	0	d__Bacteria;p__Bacteroidota;c__Bacteroidia;o__Flavobacteriales;f__Flavobacteriaceae;g__HC6-5;s__HC6-5 sp003450155
Genome_137	0	0	11	0	0	0	0	0	0	1	0	0	0	0	0	0	d__Bacteria;p__Chloroflexota;c__Dehalococcoidia;o__UBA3495;f__UBA3495;g__UBA11650;s__UBA11650 sp002401285
Genome_138	0	0	0	1	0	0	0	0	0	0	0	0	0	0	0	0	d__Bacteria;p__Actinobacteriota;c__Actinobacteria;o__Actinomycetales;f__Microbacteriaceae;g__Pontimonas;s__
Genome_139	0	0	1	1	0	0	0	0	0	0	0	0	0	0	0	0	d__Bacteria;p__Actinobacteriota;c__Actinobacteria;o__Actinomycetales;f__Microbacteriaceae;g__Aquiluna;s__
Genome_140	0	0	0	0	0	0	0	0	0	0	0	0	0	0	0	0	d__Bacteria;p__Actinobacteriota;c__Actinobacteria;o__Nanopelagicales;f__UBA10799;g__UBA10799;s__
Genome_141	0	0	0	1	0	0	0	0	0	0	0	0	0	0	0	0	d__Bacteria;p__Actinobacteriota;c__Actinobacteria;o__Actinomycetales;f__Microbacteriaceae;g__Yonghaparkia;s__
Genome_142	0	0	1	2	0	0	0	0	0	0	0	0	0	0	0	0	d__Bacteria;p__Actinobacteriota;c__Actinobacteria;o__Actinomycetales;f__Microbacteriaceae;g__Pontimonas;s__
Genome_143	0	0	1	0	0	0	0	0	0	0	0	0	0	1	0	0	d__Bacteria;p__Actinobacteriota;c__Actinobacteria;o__Mycobacteriales;f__Mycobacteriaceae;g__Mycolicibacter;s__
Genome_144	0	0	0	0	0	0	0	0	1	0	0	0	0	0	0	0	d__Bacteria;p__Proteobacteria;c__Gammaproteobacteria;o__Enterobacterales;f__Shewanellaceae;g__Shewanella;s__Shewanella sp002783895
Genome_145	0	0	2	0	0	0	0	0	0	0	0	0	0	0	0	0	d__Bacteria;p__Actinobacteriota;c__Acidimicrobiia;o__Microtrichales;f__Ilumatobacteraceae;g__Ilumatobacter;s__
Genome_146	0	0	2	0	0	0	0	0	0	1	0	0	0	0	0	0	d__Bacteria;p__Actinobacteriota;c__Acidimicrobiia;o__Microtrichales;f__UBA11606;g__UBA11606;s__
Genome_147	0	0	3	1	0	0	0	0	0	2	0	1	0	0	0	0	d__Bacteria;p__Actinobacteriota;c__Acidimicrobiia;o__Microtrichales;f__MedAcidi-G1;g__UBA9410;s__
Genome_148	0	0	8	0	0	0	0	0	0	0	0	0	0	0	0	0	d__Bacteria;p__Actinobacteriota;c__Acidimicrobiia;o__Microtrichales;f__TK06;g__UBA2110;s__UBA2110 sp002331465
Genome_149	0	0	0	0	0	0	0	0	0	1	0	0	0	0	0	0	d__Bacteria;p__Bacteroidota;c__Bacteroidia;o__Flavobacteriales;f__Flavobacteriaceae;g__Flavobacterium;s__
Genome_150	0	0	0	0	0	0	0	0	0	1	0	0	0	0	0	0	d__Bacteria;p__Bacteroidota;c__Bacteroidia;o__Flavobacteriales;f__Flavobacteriaceae;g__Flavobacterium;s__
Genome_151	0	0	0	0	0	0	0	0	0	0	0	0	0	0	0	0	d__Bacteria;p__Bacteroidota;c__Bacteroidia;o__Chitinophagales;f__;g__;s__
Genome_152	0	0	0	0	0	0	0	0	0	0	0	0	0	0	0	0	d__Bacteria;p__Bacteroidota;c__Bacteroidia;o__Flavobacteriales;f__koll-22;g__;s__
Genome_153	0	0	0	0	0	0	0	0	0	0	0	0	0	0	0	0	d__Bacteria;p__Bacteroidota;c__Rhodothermia;o__Balneolales;f__HLUCCA01;g__UBA11400;s__
Genome_154	0	0	0	0	0	0	0	0	0	1	0	0	0	0	0	0	d__Bacteria;p__Bacteroidota;c__Bacteroidia;o__Flavobacteriales;f__Crocinitomicaceae;g__UBA4466;s__
Genome_155	0	0	0	0	0	0	0	0	0	1	0	0	0	0	0	0	d__Bacteria;p__Bacteroidota;c__Bacteroidia;o__Flavobacteriales;f__Cryomorphaceae;g__UBA10364;s__UBA10364 sp003487785
Genome_156	0	0	0	0	0	0	0	0	0	0	0	0	0	0	0	0	d__Bacteria;p__Bacteroidota;c__Bacteroidia;o__UBA7662;f__UBA7662;g__UBA7662;s__
Genome_157	0	0	0	0	0	0	0	0	0	0	0	0	0	0	0	0	d__Bacteria;p__Bacteroidota;c__Bacteroidia;o__Flavobacteriales;f__GCA-002722245;g__;s__
Genome_158	0	0	0	0	0	0	0	0	0	1	0	0	0	0	0	0	d__Bacteria;p__Bacteroidota;c__Bacteroidia;o__Flavobacteriales;f__PHOS-HE28;g__;s__
Genome_159	0	0	0	0	0	0	0	0	0	1	0	0	0	0	0	0	d__Bacteria;p__Bacteroidota;c__Bacteroidia;o__Flavobacteriales;f__Weeksellaceae;g__UBA3376;s__
Genome_160	0	0	0	0	0	0	0	0	0	1	0	0	0	0	0	0	d__Bacteria;p__Bacteroidota;c__Bacteroidia;o__Flavobacteriales;f__Crocinitomicaceae;g__UBA4466;s__
Genome_161	0	0	0	0	0	0	0	0	0	1	0	0	0	0	0	0	d__Bacteria;p__Bacteroidota;c__Bacteroidia;o__Flavobacteriales;f__Cryomorphaceae;g__UBA10364;s__
Genome_162	0	0	0	0	0	0	0	0	0	1	0	0	0	0	0	0	d__Bacteria;p__Bacteroidota;c__Bacteroidia;o__Chitinophagales;f__Saprospiraceae;g__UBA1994;s__UBA1994 sp002335865
Genome_163	0	0	0	0	0	0	0	0	0	1	0	0	0	0	0	0	d__Bacteria;p__Bacteroidota;c__Bacteroidia;o__NS11-12g;f__UBA9320;g__UBA9320;s__UBA9320 sp003484585
Genome_164	0	0	0	0	0	0	0	0	0	1	0	0	0	0	0	0	d__Bacteria;p__Bacteroidota;c__Bacteroidia;o__Flavobacteriales;f__PHOS-HE28;g__;s__
Genome_165	0	0	0	0	0	0	0	0	0	1	0	0	0	0	0	0	d__Bacteria;p__Bacteroidota;c__Bacteroidia;o__Cytophagales;f__Bernardetiaceae;g__Bernardetia;s__
Genome_166	0	0	0	0	0	0	0	0	0	1	0	0	0	0	0	0	d__Bacteria;p__Bacteroidota;c__Bacteroidia;o__Flavobacteriales;f__Crocinitomicaceae;g__;s__
Genome_167	0	0	0	0	0	0	0	0	0	0	0	0	0	0	0	0	d__Bacteria;p__Bacteroidota;c__Bacteroidia;o__Chitinophagales;f__Saprospiraceae;g__;s__
Genome_168	0	0	0	0	0	0	0	0	0	1	0	0	0	0	0	0	d__Bacteria;p__Bacteroidota;c__Bacteroidia;o__Flavobacteriales;f__Crocinitomicaceae;g__;s__
Genome_169	0	0	0	0	0	0	0	0	0	1	0	0	0	0	0	0	d__Bacteria;p__Bacteroidota;c__Bacteroidia;o__Flavobacteriales;f__Cryomorphaceae;g__UBA10364;s__
Genome_170	0	0	0	0	0	0	0	0	0	1	0	0	0	0	0	0	d__Bacteria;p__Bacteroidota;c__Bacteroidia;o__Cytophagales;f__UBA9547;g__;s__
Genome_171	0	0	0	0	0	0	0	0	0	1	0	0	0	0	0	0	d__Bacteria;p__Bacteroidota;c__Bacteroidia;o__Cytophagales;f__Cyclobacteriaceae;g__Algoriphagus;s__Algoriphagus ornithinivorans
Genome_172	0	0	0	0	0	0	0	0	0	0	0	0	0	0	0	0	d__Bacteria;p__Bacteroidota;c__Bacteroidia;o__Cytophagales;f__Spirosomaceae;g__;s__
Genome_173	0	0	0	0	0	0	0	0	0	0	0	0	0	0	0	0	d__Bacteria;p__Marinisomatota;c__Marinisomatia;o__Marinisomatales;f__TCS55;g__TCS55;s__TCS55 sp002715035
Genome_174	0	0	0	0	0	0	0	0	0	0	0	0	0	0	0	0	d__Bacteria;p__Marinisomatota;c__Marinisomatia;o__Marinisomatales;f__TCS55;g__TCS55;s__TCS55 sp002715035
Genome_175	0	0	0	0	0	0	0	0	0	0	0	0	0	0	0	0	d__Bacteria;p__Marinisomatota;c__Marinisomatia;o__Marinisomatales;f__TCS55;g__TCS55;s__TCS55 sp002715035
Genome_176	0	0	0	0	0	0	0	0	0	0	0	0	0	0	0	0	d__Bacteria;p__Marinisomatota;c__Marinisomatia;o__Marinisomatales;f__TCS55;g__TCS55;s__TCS55 sp002715035
Genome_177	0	0	0	0	0	0	0	0	0	0	0	0	0	1	0	0	d__Bacteria;p__OLB16;c__OLB16;o__;f__;g__;s__
Genome_178	0	0	0	0	0	0	0	0	0	0	0	0	0	0	0	0	d__Bacteria;p__Actinobacteriota;c__Acidimicrobiia;o__Microtrichales;f__UBA8139;g__;s__
Genome_179	0	0	0	0	0	0	0	0	0	0	0	0	0	0	0	0	d__Bacteria;p__Verrucomicrobiota_A;c__Chlamydiia;o__Parachlamydiales;f__Simkaniaceae;g__;s__
Genome_180	0	0	0	0	0	0	0	0	0	0	0	0	0	0	0	0	d__Bacteria;p__Proteobacteria;c__Gammaproteobacteria;o__Xanthomonadales;f__Xanthomonadaceae;g__Arenimonas;s__
Genome_181	0	0	7	0	0	0	0	0	0	0	0	0	0	0	0	0	d__Bacteria;p__Chloroflexota;c__Dehalococcoidia;o__UBA3495;f__UBA3495;g__UBA9611;s__
Genome_182	0	0	7	0	0	0	0	0	0	0	0	0	0	0	0	0	d__Bacteria;p__Chloroflexota;c__Dehalococcoidia;o__UBA3495;f__UBA3495;g__UBA9611;s__
Genome_183	0	0	6	0	0	0	0	0	0	0	0	0	0	0	1	0	d__Bacteria;p__Chloroflexota;c__Dehalococcoidia;o__UBA3495;f__UBA3495;g__UBA9611;s__UBA9611 sp002746355
Genome_184	0	0	5	0	0	0	0	0	0	0	0	0	0	0	0	0	d__Bacteria;p__Chloroflexota;c__Dehalococcoidia;o__UBA3495;f__UBA3495;g__UBA9611;s__
Genome_185	0	0	6	0	0	0	0	0	0	0	0	0	0	0	0	0	d__Bacteria;p__Chloroflexota;c__Dehalococcoidia;o__UBA3495;f__UBA3495;g__UBA9611;s__
Genome_186	0	0	7	0	0	0	0	0	0	0	0	0	0	0	0	0	d__Bacteria;p__Chloroflexota;c__Dehalococcoidia;o__UBA3495;f__UBA3495;g__UBA9611;s__
Genome_187	0	0	8	0	0	0	0	0	0	0	0	0	0	0	1	0	d__Bacteria;p__Chloroflexota;c__Dehalococcoidia;o__UBA3495;f__UBA3495;g__UBA9611;s__
Genome_188	0	0	4	1	0	0	0	0	0	0	0	0	0	0	0	0	d__Bacteria;p__Chloroflexota;c__Dehalococcoidia;o__UBA3495;f__UBA3495;g__Casp-Chloro-G3;s__
Genome_189	0	0	0	0	0	0	0	0	0	0	0	0	0	0	0	0	d__Bacteria;p__Cyanobacteria;c__Cyanobacteriia;o__Synechococcales;f__Cyanobiaceae;g__Synechococcus_C;s__
Genome_190	0	0	0	0	0	0	0	0	0	0	0	0	0	0	0	0	d__Bacteria;p__Cyanobacteria;c__Cyanobacteriia;o__Synechococcales;f__Cyanobiaceae;g__Synechococcus_C;s__Synechococcus_C sp003208835
Genome_191	0	0	0	0	0	0	0	0	0	0	0	0	0	0	0	0	d__Archaea;p__Thermoplasmatota;c__Poseidoniia;o__Poseidoniales;f__Thalassoarchaeaceae;g__MGIIb-O1;s__MGIIb-O1 sp002498525
Genome_192	0	0	0	0	0	0	0	0	0	0	0	0	0	0	0	0	d__Archaea;p__UAP2;c__UBA543;o__UBA543;f__UBA55;g__UBA55;s__UBA55 sp002495465
Genome_193	0	0	0	0	0	0	0	0	0	0	0	0	0	0	0	0	d__Archaea;p__Thermoplasmatota;c__Poseidoniia;o__Poseidoniales;f__Thalassoarchaeaceae;g__Thalassarchaeum;s__Thalassarchaeum sp002495735
Genome_194	0	0	0	0	0	0	0	0	0	2	0	0	0	0	0	0	d__Bacteria;p__Bacteroidota;c__Ignavibacteria;o__Ignavibacteriales;f__Melioribacteraceae;g__GCA-2698995;s__
Genome_195	0	0	0	0	0	0	0	0	0	1	0	0	0	0	0	0	d__Bacteria;p__Nitrospinota;c__Nitrospinia;o__Nitrospinales;f__Nitrospinaceae;g__LS-NOB;s__LS-NOB sp003545625
Genome_196	0	0	0	0	0	0	0	0	0	0	0	0	0	0	0	0	d__Bacteria;p__Nitrospinota;c__Nitrospinia;o__Nitrospinales;f__Nitrospinaceae;g__LS-NOB;s__LS-NOB sp003545625
Genome_197	0	0	0	0	0	0	0	0	0	0	0	0	0	0	0	0	d__Bacteria;p__Patescibacteria;c__Paceibacteria;o__UBA9983_A;f__UBA2163;g__OLB19;s__
Genome_198	0	0	0	0	0	0	0	0	0	0	0	0	0	0	0	0	d__Bacteria;p__Patescibacteria;c__Paceibacteria;o__UBA9983_A;f__UBA2163;g__OLB19;s__
Genome_199	0	0	0	0	0	0	0	0	0	0	0	0	0	0	0	0	d__Bacteria;p__Patescibacteria;c__Paceibacteria;o__UBA9983_A;f__UBA2163;g__C7867-001;s__
Genome_200	0	0	0	0	0	0	0	0	0	0	0	0	0	0	0	0	d__Bacteria;p__Patescibacteria;c__Paceibacteria;o__UBA9983_A;f__UBA2163;g__UBA2100;s__
Genome_201	0	0	0	0	0	0	0	0	0	0	0	0	0	0	0	0	d__Bacteria;p__Patescibacteria;c__Paceibacteria;o__UBA9983_A;f__UBA2163;g__1-14-0-10-45-20;s__
Genome_202	0	0	0	0	0	0	0	0	0	1	0	0	0	0	0	0	d__Bacteria;p__Patescibacteria;c__Gracilibacteria;o__UBA1369;f__GCA-2718715;g__;s__
Genome_203	0	0	0	0	0	0	0	0	0	0	0	0	0	0	0	0	d__Bacteria;p__Planctomycetota;c__Planctomycetes;o__Pirellulales;f__UBA1268;g__UBA1268;s__
Genome_204	0	0	0	0	0	0	0	0	0	0	0	0	0	0	0	1	d__Bacteria;p__Planctomycetota;c__Planctomycetes;o__Pirellulales;f__Pirellulaceae;g__Mariniblastus;s__
Genome_205	0	0	0	0	0	0	0	0	0	0	0	0	0	0	0	0	d__Bacteria;p__Bacteroidota;c__Rhodothermia;o__Rhodothermales;f__Rubricoccaceae;g__Rubrivirga;s__Rubrivirga sp002283555
Genome_206	0	0	0	0	0	0	0	0	0	0	0	0	0	0	0	1	d__Bacteria;p__Spirochaetota;c__Leptospirae;o__Leptospirales;f__;g__;s__
Genome_207	0	0	0	0	0	0	0	0	0	0	0	0	0	0	0	0	d__Archaea;p__Crenarchaeota;c__Nitrososphaeria;o__Nitrososphaerales;f__UBA57;g__UBA57;s__UBA57 sp002494565
Genome_208	0	0	0	0	0	0	0	0	0	0	0	0	0	0	0	0	d__Bacteria;p__Verrucomicrobiota;c__Verrucomicrobiae;o__Opitutales;f__MB11C04;g__GCA-2730975;s__
Genome_209	0	0	0	0	0	0	0	0	0	0	0	0	0	0	0	0	d__Bacteria;p__Verrucomicrobiota;c__Verrucomicrobiae;o__Verrucomicrobiales;f__Akkermansiaceae;g__;s__
Genome_210	0	0	0	0	0	0	0	0	0	0	0	0	0	0	0	0	d__Bacteria;p__Verrucomicrobiota;c__Verrucomicrobiae;o__Verrucomicrobiales;f__Akkermansiaceae;g__;s__
Genome_211	0	0	0	0	0	0	0	0	0	0	0	0	0	0	0	0	d__Bacteria;p__Verrucomicrobiota;c__Verrucomicrobiae;o__Pedosphaerales;f__UBA1096;g__UBA1096;s__
Genome_212	0	0	0	0	0	0	0	0	0	0	0	0	0	0	0	0	d__Bacteria;p__Verrucomicrobiota;c__Verrucomicrobiae;o__Verrucomicrobiales;f__Akkermansiaceae;g__;s__
Genome_213	0	0	0	0	0	0	0	0	0	0	0	0	0	0	0	0	d__Bacteria;p__Verrucomicrobiota;c__Verrucomicrobiae;o__Opitutales;f__MB11C04;g__MB11C04;s__
Genome_214	0	0	0	0	0	0	0	0	0	0	0	0	0	0	0	0	d__Bacteria;p__Verrucomicrobiota;c__Verrucomicrobiae;o__Verrucomicrobiales;f__Akkermansiaceae;g__SW10;s__SW10 sp000383735

## Sheet: Table S4
Table S4 Raw abundances of DMS/DMSP related genes in Tara Ocean samples.
Sample label [TARA_station#_environmental-feature_size-fraction]	Sampling depth [m]	Latitude [degrees North]	Longitude [degrees East]	Group	Raw abundance
					DsyB	MmtN	DddD	DddP	DddK	DddW	DddQ	DddL	DddY	DmdA	DMSOR	Tmm	DsoB	DdhA	DmoA	MddA	COG0012	COG0016	COG0018	COG0172	COG0215	COG0495	COG0525	COG0533	COG0541	COG0552
TARA_004_DCM_0.22-1.6	40	36.5533	-6.5669	Surface	0	0	20	23	1	0	5	0	0	74	14	10	0	0	1	0	173	144	23	187	159	362	261	116	130	57
TARA_004_SRF_0.22-1.6	5	36.5533	-6.5669	Surface	0	0	10	16	1	0	5	0	0	57	8	5	0	0	0	0	137	147	19	153	131	386	234	110	117	57
TARA_007_DCM_0.22-1.6	42	37.0541	1.9478	Surface	0	0	3	11	2	0	5	0	0	25	4	7	1	0	0	0	63	55	21	70	68	106	117	43	60	29
TARA_007_SRF_0.22-1.6	5	37.051	1.9378	Surface	1	0	8	17	1	0	4	0	0	54	11	3	1	0	0	0	99	97	17	111	93	248	145	66	79	46
TARA_009_DCM_0.22-1.6	55	39.0609	5.9422	Surface	1	0	30	18	7	0	5	0	0	88	10	12	0	0	1	0	179	155	24	221	200	435	298	123	128	65
TARA_009_SRF_0.22-1.6	5	39.1633	5.916	Surface	1	0	19	22	1	0	6	2	0	77	19	7	1	0	0	0	162	155	25	163	162	390	234	107	122	81
TARA_018_DCM_0.22-1.6	60	35.7528	14.2765	Surface	1	0	23	18	0	0	5	0	0	86	12	9	0	0	1	0	170	168	35	184	188	426	240	131	134	70
TARA_018_SRF_0.22-1.6	5	35.759	14.2574	Surface	3	0	22	20	2	0	6	0	0	85	19	9	0	0	0	0	181	155	25	188	174	480	273	147	128	72
TARA_023_DCM_0.22-1.6	55	42.1735	17.7252	Surface	0	0	1	1	0	0	0	0	0	5	1	0	0	0	0	0	6	4	0	4	8	11	11	3	6	2
TARA_023_SRF_0.22-1.6	5	42.2038	17.715	Surface	0	0	15	25	2	0	1	1	0	55	6	9	1	0	0	0	97	70	17	105	87	225	167	68	70	35
TARA_025_DCM_0.22-1.6	50	39.3991	19.3997	Surface	3	0	45	37	4	0	3	1	0	78	13	11	0	2	0	0	145	120	23	167	161	296	236	110	112	65
TARA_025_SRF_0.22-1.6	5	39.3888	19.3905	Surface	1	0	25	32	1	0	6	0	a	89	19	9	1	1	0	0	144	137	32	167	141	478	251	130	129	73
TARA_030_DCM_0.22-1.6	70	33.9235	32.8118	Surface	1	0	17	29	1	0	4	1	0	149	15	10	0	0	0	0	234	209	24	237	190	583	333	172	172	87
TARA_030_SRF_0.22-1.6	5	33.9179	32.898	Surface	0	0	17	20	2	0	1	0	0	94	12	8	0	0	0	0	161	163	21	185	143	390	215	144	121	77
TARA_031_SRF_0.22-1.6	5	27.16	34.835	Surface	2	0	11	17	0	0	3	0	0	37	8	9	0	0	0	0	78	96	12	114	97	247	123	80	64	34
TARA_032_DCM_0.22-1.6	80	23.4183	37.245	Surface	2	0	77	26	0	0	1	0	0	30	14	5	0	4	5	0	121	124	28	128	149	214	206	94	116	64
TARA_032_SRF_0.22-1.6	5	23.36	37.2183	Surface	1	0	10	14	0	0	0	0	0	34	3	9	0	1	0	0	71	78	8	110	94	220	132	69	53	28
TARA_033_SRF_0.22-1.6	5	21.9467	38.2517	Surface	0	0	12	15	0	0	2	0	0	35	4	8	0	1	0	0	71	76	11	98	86	208	116	63	62	32
TARA_034_DCM_0.22-1.6	60	18.4417	39.8567	Surface	0	0	92	50	0	0	2	0	0	57	6	7	0	0	1	0	179	191	40	251	233	361	329	148	205	91
TARA_034_SRF_0.22-1.6	5	18.3967	39.875	Surface	1	0	16	13	0	0	3	0	0	44	6	5	0	2	0	0	68	58	6	88	81	151	109	49	60	27
TARA_036_DCM_0.22-1.6	17	20.8222	63.5133	Surface	0	0	5	12	0	0	2	0	0	43	6	4	0	0	0	0	100	78	11	113	102	301	131	76	71	46
TARA_036_SRF_0.22-1.6	5	20.8183	63.5047	Surface	0	0	7	7	3	0	2	0	0	32	4	3	0	0	0	0	71	59	6	76	63	153	104	50	47	31
TARA_038_DCM_0.22-1.6	25	19.0284	64.5126	Surface	0	0	15	14	4	0	4	0	0	48	5	3	0	1	0	0	98	79	16	89	93	177	134	65	69	34
TARA_038_SRF_0.22-1.6	5	19.0393	64.4913	Surface	0	0	8	10	4	0	2	0	0	28	1	3	0	0	0	0	54	43	10	47	50	111	89	38	48	18
TARA_039_DCM_0.22-1.6	25	18.5839	66.4727	Surface	0	0	18	16	0	0	7	0	0	41	6	4	0	2	1	0	62	55	15	68	69	135	104	34	63	30
TARA_041_DCM_0.22-1.6	60	14.5536	70.0128	Surface	0	0	20	14	1	0	1	0	0	48	8	6	0	1	1	0	122	107	25	148	130	230	185	83	102	46
TARA_041_SRF_0.22-1.6	5	14.6059	69.9776	Surface	0	0	7	13	0	0	2	0	0	28	2	5	0	0	0	0	74	66	11	89	77	214	105	55	59	29
TARA_042_DCM_0.22-1.6	80	5.9998	73.9067	Surface	0	0	24	23	0	0	1	0	0	50	8	9	0	0	1	1	113	93	16	129	115	179	164	78	96	44
TARA_042_SRF_0.22-1.6	5	6.0001	73.8955	Surface	0	0	11	14	0	0	3	0	0	27	4	5	0	0	0	0	59	73	7	93	85	200	105	55	52	29
TARA_045_SRF_0.22-1.6	5	0.0033	71.6428	Surface	1	0	12	14	0	0	4	0	0	26	4	2	0	0	0	0	61	83	11	89	82	229	97	59	53	30
TARA_048_SRF_0.22-1.6	5	-9.3921	66.4228	Surface	0	0	7	13	0	0	3	0	0	30	9	3	0	0	1	0	80	102	9	113	86	306	121	63	71	32
TARA_052_DCM_0.22-1.6	75	-16.9534	53.9601	Surface	1	0	17	18	1	0	4	0	0	49	6	6	0	0	0	0	112	110	21	144	136	224	184	78	83	40
TARA_052_SRF_0.22-1.6	5	-16.957	53.9801	Surface	0	0	14	10	0	0	1	0	0	36	6	1	0	0	0	0	92	104	17	127	95	204	139	74	70	31
TARA_056_SRF_0.22-3	5	-15.3424	43.2965	Surface	0	0	9	19	0	0	4	0	0	34	6	3	0	0	0	0	69	55	7	90	86	152	121	46	49	27
TARA_057_SRF_0.22-3	5	-17.0248	42.7401	Surface	0	0	12	18	0	0	5	0	0	38	6	4	0	2	0	0	76	66	13	76	90	138	107	64	65	32
TARA_058_DCM_0.22-3	66	-17.2855	42.2866	Surface	0	0	9	21	0	0	6	0	0	33	6	8	1	0	0	0	89	74	21	98	91	151	145	48	66	34
TARA_062_SRF_0.22-3	5	-22.3368	40.3412	Surface	0	0	8	15	0	0	5	0	0	35	5	7	0	0	0	0	83	65	7	83	90	172	104	57	63	26
TARA_064_DCM_0.22-3	65	-29.5333	37.9117	Surface	1	0	16	13	0	0	2	0	0	26	4	1	1	2	0	0	80	72	23	73	92	134	142	54	76	34
TARA_064_SRF_0.22-3	5	-29.5019	37.9889	Surface	0	0	20	20	1	0	3	0	0	49	7	8	0	3	0	0	127	134	15	165	166	378	205	105	107	55
TARA_065_DCM_0.22-3	30	-35.2421	26.3048	Surface	0	0	7	13	0	0	1	0	0	21	6	4	0	2	0	0	65	67	15	72	72	147	120	47	68	26
TARA_065_SRF_0.22-3	5	-35.1728	26.2868	Surface	0	0	9	13	0	0	2	0	0	34	2	5	0	1	0	0	67	55	10	79	65	119	117	37	61	27
TARA_066_DCM_0.22-3	30	-34.8901	18.0459	Surface	0	0	3	3	1	0	2	0	0	15	3	5	0	1	0	0	39	25	6	34	34	40	65	19	20	6
TARA_066_SRF_0.22-3	5	-34.9449	17.9189	Surface	0	0	7	8	1	0	4	0	0	34	2	8	0	2	0	0	83	53	11	77	74	109	127	59	43	22
TARA_067_SRF_0.22-0.45	5	-32.2401	17.7103	Surface	0	0	2	3	4	0	2	0	1	22	1	3	0	0	0	0	63	65	1	88	60	228	82	54	32	21
TARA_067_SRF_0.22-3	5	-32.2401	17.7103	Surface	0	0	10	8	3	0	3	0	0	25	4	4	0	0	0	1	71	67	8	76	59	100	115	50	56	32
TARA_067_SRF_0.45-0.8	5	-32.2401	17.7103	Surface	0	0	13	10	3	0	2	0	1	36	11	6	0	0	0	1	118	108	19	117	96	154	170	80	94	58
TARA_068_DCM_0.22-0.45	50	-31.027	4.6802	Surface	0	0	21	16	2	0	4	0	0	50	6	3	2	2	0	0	108	123	17	131	152	269	212	96	108	34
TARA_068_DCM_0.22-3	50	-31.027	4.6802	Surface	0	0	6	8	0	0	2	0	0	24	5	2	0	1	0	0	56	46	14	54	60	95	109	37	43	20
TARA_068_DCM_0.45-0.8	50	-31.027	4.6802	Surface	0	0	17	14	1	0	3	0	0	45	10	2	0	2	0	0	100	80	26	109	104	156	172	68	82	40
TARA_068_SRF_0.22-0.45	5	-31.0266	4.665	Surface	0	0	13	12	5	0	4	0	0	71	5	10	0	3	0	0	120	90	15	142	116	280	187	93	88	40
TARA_068_SRF_0.22-3	5	-31.0266	4.665	Surface	0	0	5	12	0	0	2	0	0	29	3	3	0	0	0	0	69	42	14	61	72	112	115	33	52	27
TARA_068_SRF_0.45-0.8	5	-31.0266	4.665	Surface	0	0	13	16	2	0	2	0	0	49	10	4	0	3	0	0	91	88	28	93	115	146	168	66	85	37
TARA_070_SRF_0.22-0.45	5	-20.4091	-3.1759	Surface	0	0	26	12	1	0	1	0	0	59	9	4	0	0	0	0	155	137	20	172	154	382	240	118	99	46
TARA_070_SRF_0.22-3	5	-20.4091	-3.1759	Surface	0	0	2	3	2	0	0	0	0	12	0	1	0	0	0	0	31	26	19	48	49	64	57	17	33	13
TARA_070_SRF_0.45-0.8	5	-20.4091	-3.1759	Surface	0	1	25	10	1	0	1	0	0	47	10	3	1	0	0	0	125	110	40	115	135	235	182	72	108	59
TARA_072_DCM_0.22-3	100	-8.7296	-17.9604	Surface	1	0	14	21	2	0	0	0	0	52	5	7	0	0	0	0	136	123	18	142	119	231	209	101	130	48
TARA_072_SRF_0.22-3	5	-8.7789	-17.9099	Surface	0	0	6	9	0	0	1	0	0	34	5	6	0	0	0	0	56	64	8	77	64	116	102	56	48	36
TARA_076_DCM_0.22-0.45	150	-21.0292	-35.3498	Surface	1	0	42	17	1	0	0	0	0	54	5	7	0	2	0	0	111	108	6	118	155	303	214	117	112	36
TARA_076_DCM_0.22-3	150	-21.0292	-35.3498	Surface	0	1	40	6	0	0	0	1	0	14	3	2	0	1	2	0	59	56	19	69	78	97	99	44	75	40
TARA_076_DCM_0.45-0.8	150	-21.0292	-35.3498	Surface	1	0	45	15	0	0	0	0	0	14	4	2	0	2	3	0	71	79	23	88	95	115	148	55	86	46
TARA_076_SRF_0.22-0.45	5	-20.9354	-35.1803	Surface	0	0	9	8	0	0	1	0	0	39	5	1	1	0	0	0	103	95	5	140	102	458	168	102	66	26
TARA_076_SRF_0.22-3	5	-20.9354	-35.1803	Surface	1	0	0	6	0	0	0	0	0	12	1	2	0	0	0	0	25	19	9	31	38	54	49	23	31	13
TARA_076_SRF_0.45-0.8	5	-20.9354	-35.1803	Surface	0	0	2	13	0	0	2	0	0	27	4	2	0	0	0	0	60	59	13	78	70	131	97	52	64	30
TARA_078_DCM_0.22-0.45	120	-30.1484	-43.2705	Surface	0	0	36	16	0	0	4	0	0	58	7	2	0	0	2	0	141	136	9	170	147	336	222	114	120	47
TARA_078_DCM_0.22-3	120	-30.1484	-43.2705	Surface	0	0	17	16	0	0	1	0	0	31	6	3	0	2	0	0	96	74	18	94	117	163	156	58	98	38
TARA_078_DCM_0.45-0.8	120	-30.1484	-43.2705	Surface	1	0	31	8	0	0	0	0	0	25	5	3	0	1	0	0	95	73	19	97	94	135	149	61	104	44
TARA_078_SRF_0.22-0.45	5	-30.1367	-43.2899	Surface	0	0	2	14	4	0	4	0	0	53	5	5	0	0	0	0	87	91	6	114	91	322	172	80	75	28
TARA_078_SRF_0.22-3	5	-30.1367	-43.2899	Surface	0	0	9	13	0	0	2	0	0	34	5	5	0	0	0	0	66	56	12	78	67	125	112	41	62	27
TARA_078_SRF_0.45-0.8	5	-30.1367	-43.2899	Surface	0	0	7	12	0	0	0	0	1	32	4	3	1	0	0	0	71	50	16	71	70	98	110	50	71	42
TARA_082_DCM_0.22-3	40	-47.2007	-57.9446	Surface	0	0	13	16	4	0	5	0	0	55	6	9	0	0	0	0	105	93	8	137	116	306	167	77	102	61
TARA_082_SRF_0.22-3	5	-47.1863	-58.2902	Surface	0	0	10	9	1	0	3	0	0	34	6	7	0	0	0	0	74	66	5	69	66	135	103	59	77	49
TARA_093_DCM_0.22-3	35	-33.9116	-73.0537	Surface	1	0	13	8	6	0	3	0	0	41	5	6	0	3	0	1	133	107	29	143	112	314	191	108	99	64
TARA_093_SRF_0.22-3	5	-34.0614	-73.1066	Surface	0	0	6	2	0	0	1	0	0	17	3	2	0	0	0	0	42	29	3	42	34	82	58	30	20	17
TARA_094_SRF_0.22-3	5	-32.7971	-87.0693	Surface	0	0	23	22	3	0	8	0	0	91	15	11	2	0	1	0	235	222	20	228	190	691	317	177	136	87
TARA_096_SRF_0.22-3	5	-29.7238	-101.16	Surface	0	0	9	7	3	0	1	0	0	44	11	3	1	0	0	0	102	111	11	102	74	401	140	86	69	38
TARA_098_DCM_0.22-3	188	-25.826	-111.729	Surface	1	0	11	12	0	0	0	0	0	39	5	7	0	0	0	0	110	82	18	122	103	212	174	90	107	33
TARA_098_SRF_0.22-3	5	-25.8051	-111.72	Surface	0	0	7	3	1	0	2	0	0	32	3	2	0	0	0	0	69	76	7	78	69	267	86	68	37	26
TARA_099_SRF_0.22-3	5	-21.146	-104.787	Surface	0	0	7	5	1	0	2	0	0	30	7	1	0	0	1	0	95	107	11	119	97	316	144	82	58	40
TARA_100_DCM_0.22-3	50	-12.9723	-96.0122	Surface	0	0	7	32	1	0	2	0	0	89	8	8	2	1	1	0	173	170	35	197	181	399	284	132	140	74
TARA_100_MES_0.22-3	177	-12.9794	-96.0232	Surface	0	0	62	21	2	0	0	1	0	36	6	9	2	21	0	3	116	114	35	124	151	199	201	105	118	59
TARA_100_SRF_0.22-3	5	-13.0023	-95.9759	Surface	0	0	7	17	0	0	5	0	0	44	10	4	0	1	0	0	149	159	11	164	113	424	189	122	89	49
TARA_102_DCM_0.22-3	40	-5.2669	-85.2732	Surface	0	0	13	15	6	0	6	0	0	47	6	10	0	1	1	1	156	140	30	171	146	373	237	119	121	59
TARA_102_SRF_0.22-3	5	-5.2529	-85.1545	Surface	0	0	11	8	4	0	3	0	0	47	5	5	0	0	0	0	133	138	20	126	116	357	179	93	104	51
TARA_109_DCM_0.22-3	30	2.0299	-84.5546	Surface	0	0	15	14	1	0	4	0	0	30	4	2	0	0	0	0	98	95	12	100	88	176	151	64	65	33
TARA_109_SRF_0.22-3	5	1.9928	-84.5766	Surface	0	0	2	2	1	0	1	0	0	7	0	1	0	0	0	0	14	8	0	7	12	28	17	7	12	6
TARA_110_DCM_0.22-3	50	-1.9002	-84.6265	Surface	0	0	7	15	1	0	3	0	0	39	2	2	0	0	0	0	112	90	30	118	125	258	178	71	80	34
TARA_110_SRF_0.22-3	5	-2.0133	-84.589	Surface	0	0	5	6	2	0	3	0	0	28	5	4	0	0	0	0	93	93	15	107	82	213	138	55	69	34
TARA_111_DCM_0.22-3	90	-16.9587	-100.675	Surface	0	0	10	25	1	0	1	0	0	99	10	9	0	0	0	0	193	183	26	242	193	441	346	165	187	92
TARA_111_SRF_0.22-3	5	-16.9601	-100.633	Surface	0	0	6	15	1	0	3	0	0	57	9	5	0	0	0	0	135	149	15	153	112	453	209	111	94	39
TARA_112_DCM_0.22-3	155	-23.2189	-129.5	Surface	0	0	17	13	0	0	2	0	0	57	3	6	0	2	1	0	122	117	22	150	127	230	215	112	141	61
TARA_112_SRF_0.22-3	5	-23.2811	-129.395	Surface	0	0	7	11	1	0	4	0	0	38	6	7	0	0	0	0	105	112	9	144	129	349	162	90	78	37
TARA_122_DCM_0.22-0.45	115	-9.0063	-139.139	Surface	0	0	61	30	2	0	3	0	0	128	12	18	2	3	4	1	232	227	29	248	231	481	354	212	199	89
TARA_122_DCM_0.22-3	115	-9.0063	-139.139	Surface	1	0	51	40	1	0	0	0	0	116	11	16	0	4	3	0	217	204	38	239	230	412	326	200	222	105
TARA_122_DCM_0.45-0.8	115	-9.0063	-139.139	Surface	0	0	20	8	0	0	1	0	0	22	3	3	1	4	0	0	125	124	74	153	143	224	217	107	152	71
TARA_122_SRF_0.22-0.45	5	-8.9971	-139.196	Surface	0	0	3	8	0	0	2	0	0	13	3	2	0	0	0	0	55	60	5	60	60	208	95	48	33	17
TARA_122_SRF_0.22-3	5	-8.9971	-139.196	Surface	0	0	5	10	0	0	0	0	0	33	3	6	0	1	0	0	78	79	13	89	80	232	133	61	76	27
TARA_122_SRF_0.45-0.8	5	-8.9971	-139.196	Surface	0	0	8	7	0	0	2	0	0	19	3	2	0	1	0	1	73	75	29	84	80	122	119	54	81	42
TARA_123_MIX_0.22-0.45	150	-8.9109	-140.285	Surface	1	0	67	36	0	0	0	0	0	63	6	11	2	3	3	0	184	161	42	209	215	369	320	146	196	99
TARA_123_MIX_0.22-3	150	-8.9109	-140.285	Surface	2	0	80	49	0	0	1	0	0	87	9	8	0	1	5	0	219	198	28	282	269	420	394	180	262	124
TARA_123_MIX_0.45-0.8	150	-8.9109	-140.285	Surface	0	0	5	0	0	0	0	0	0	1	0	1	3	0	0	0	27	20	21	29	30	53	41	26	26	23
TARA_123_SRF_0.22-0.45	5	-8.9068	-140.283	Surface	1	0	12	16	0	0	2	0	0	32	4	7	0	0	1	1	104	105	5	140	118	434	149	100	67	33
TARA_123_SRF_0.22-3	5	-8.9068	-140.283	Surface	1	0	11	18	0	0	3	0	0	30	5	5	0	0	0	1	97	87	12	109	108	226	143	74	94	39
TARA_123_SRF_0.45-0.8	5	-8.9068	-140.283	Surface	1	0	18	12	1	0	3	0	0	39	7	4	1	1	0	1	115	117	18	133	122	253	181	80	112	51
TARA_124_MIX_0.22-0.45	120	-9.0714	-140.597	Surface	1	0	54	27	0	0	0	0	0	87	11	13	1	5	1	0	172	169	13	184	193	427	257	153	147	66
TARA_124_MIX_0.22-3	120	-9.0714	-140.597	Surface	6	0	83	37	1	0	3	0	0	69	21	8	0	4	4	1	182	185	42	200	224	403	293	142	169	74
TARA_124_MIX_0.45-0.8	120	-9.0714	-140.597	Surface	8	0	95	30	0	0	0	0	0	34	20	4	5	3	4	1	141	140	52	166	181	230	238	108	150	93
TARA_124_SRF_0.22-0.45	5	-9.1504	-140.522	Surface	1	0	24	14	1	0	2	0	0	38	2	6	0	0	1	1	115	137	8	114	117	423	154	97	69	42
TARA_124_SRF_0.22-3	5	-9.1504	-140.522	Surface	2	1	37	26	3	0	2	0	0	52	8	7	1	0	1	2	184	206	28	214	182	599	223	152	135	76
TARA_124_SRF_0.45-0.8	5	-9.1504	-140.522	Surface	1	0	22	13	0	0	2	0	0	20	6	3	2	1	0	4	97	120	37	115	77	154	163	67	104	64
TARA_125_MIX_0.22-0.45	140	-8.8999	-142.546	Surface	0	0	20	18	3	0	1	0	0	50	3	6	0	0	0	0	158	145	10	175	127	563	183	140	71	29
TARA_125_MIX_0.22-3	140	-8.8999	-142.546	Surface	0	0	113	42	1	0	1	0	0	95	7	14	1	3	4	0	228	202	29	339	286	499	420	203	279	135
TARA_125_MIX_0.45-0.8	140	-8.8999	-142.546	Surface	0	0	8	10	0	0	2	0	0	32	3	3	1	1	0	2	112	110	38	119	116	189	165	86	114	72
TARA_125_SRF_0.22-0.45	5	-8.9111	-142.557	Surface	0	0	81	54	1	0	0	0	0	138	5	29	0	1	6	0	286	242	11	364	299	594	452	263	299	146
TARA_125_SRF_0.22-3	5	-8.9111	-142.557	Surface	1	0	15	15	2	0	0	0	0	51	3	7	0	0	0	0	146	136	16	157	127	446	185	114	85	45
TARA_125_SRF_0.45-0.8	5	-8.9111	-142.557	Surface	0	0	108	33	0	0	0	0	0	26	10	6	5	2	5	1	168	151	57	176	206	289	263	128	169	104
TARA_128_DCM_0.22-3	40	0.0222	-153.686	Surface	0	0	16	13	0	0	2	0	0	36	4	6	1	0	0	0	94	97	21	110	95	212	152	69	93	44
TARA_128_SRF_0.22-3	5	0.0003	-153.676	Surface	0	0	13	7	0	0	2	0	0	39	4	5	0	0	0	0	85	77	15	102	83	180	129	51	70	35
TARA_132_DCM_0.22-3	115	31.5168	-159.046	Surface	0	0	23	26	2	0	1	0	0	45	8	8	0	2	1	0	153	141	31	159	138	304	241	99	139	51
TARA_132_SRF_0.22-3	5	31.5213	-158.996	Surface	0	0	6	6	0	0	3	0	0	36	5	2	0	0	1	0	93	101	12	122	116	322	124	72	65	34
TARA_133_DCM_0.22-3	45	35.4002	-127.75	Surface	0	0	14	12	4	0	5	0	0	44	12	10	0	1	0	0	126	95	26	129	120	260	200	88	104	51
TARA_133_SRF_0.22-3	5	35.3671	-127.742	Surface	0	0	18	14	3	0	3	0	1	69	13	8	0	0	1	2	212	172	34	223	175	506	282	162	154	78
TARA_137_DCM_0.22-3	40	14.2075	-116.647	Surface	1	0	62	21	0	0	1	0	0	28	6	7	0	26	0	4	93	92	21	106	125	172	156	71	103	57
TARA_137_SRF_0.22-3	5	14.2035	-116.626	Surface	0	0	5	10	0	0	4	0	0	41	3	3	0	0	0	0	101	83	6	104	103	243	134	60	77	39
TARA_138_DCM_0.22-3	60	6.3378	-102.954	Surface	0	0	10	12	2	0	2	0	0	42	8	11	0	4	0	0	106	93	27	117	116	263	205	74	96	44
TARA_138_SRF_0.22-3	5	6.3332	-102.943	Surface	0	0	10	7	0	0	1	0	0	22	3	3	0	0	0	0	86	67	12	91	80	235	140	70	61	25
TARA_140_SRF_0.22-3	5	7.4122	-79.3017	Surface	0	0	18	9	0	0	4	0	1	40	1	1	0	0	0	0	82	99	18	103	93	274	123	72	60	41
TARA_141_SRF_0.22-3	5	9.8481	-80.0454	Surface	0	0	11	21	1	0	6	1	0	47	3	9	0	2	0	0	111	98	11	124	124	250	160	80	97	53
TARA_142_DCM_0.22-3	125	25.6168	-88.4532	Surface	0	0	14	21	0	0	1	1	1	41	6	10	0	3	1	0	144	113	17	162	151	317	187	113	123	50
TARA_142_SRF_0.22-3	5	25.5264	-88.394	Surface	0	0	25	24	0	0	2	2	0	73	5	11	0	3	1	0	142	144	16	178	169	368	202	117	130	52
TARA_145_SRF_0.22-3	5	39.2305	-70.0377	Surface	1	0	43	22	9	0	4	0	0	68	13	7	0	0	1	0	155	133	24	165	155	262	258	122	126	62
TARA_146_SRF_0.22-3	5	34.6712	-71.3093	Surface	0	0	29	25	1	0	0	0	0	57	8	16	2	1	1	3	145	126	14	180	158	306	222	117	146	57
TARA_148_SRF_0.22-3	5	31.6948	-64.2489	Surface	0	0	24	22	0	0	1	0	0	60	10	9	0	3	0	1	150	139	13	164	137	305	213	116	131	50
TARA_149_SRF_0.22-3	5	34.1132	-49.9181	Surface	0	0	21	20	0	0	3	0	0	41	7	8	0	2	0	0	119	105	19	124	129	230	211	80	124	55
TARA_150_DCM_0.22-3	40	35.8427	-37.1526	Surface	0	0	9	17	1	0	3	0	0	54	9	7	0	0	1	0	123	104	14	135	134	237	201	77	100	44
TARA_150_SRF_0.22-3	5	35.9346	-37.3032	Surface	0	0	8	16	1	0	1	0	0	46	8	6	0	0	1	0	115	97	11	124	109	268	180	71	88	42
TARA_151_DCM_0.22-3	80	36.1811	-28.9373	Surface	1	0	34	14	3	0	6	0	0	53	9	7	0	2	1	0	120	104	21	139	144	279	215	84	106	49
TARA_151_SRF_0.22-3	5	36.1715	-29.023	Surface	0	0	6	12	4	0	4	0	0	58	5	5	0	0	0	0	138	100	15	140	138	364	229	90	110	50
TARA_152_MIX_0.22-3	25	43.7056	-16.8794	Surface	0	0	22	15	4	0	6	0	0	72	8	6	0	0	1	0	144	132	16	160	159	314	207	90	101	47
TARA_152_SRF_0.22-3	5	43.6792	-16.8344	Surface	0	0	19	19	4	0	3	0	0	71	9	11	0	0	0	0	132	114	14	138	132	264	206	86	97	44
TARA_037_MES_0.22-1.6	600	20.8457	63.5851	Deep	2	0	61	33	0	0	2	0	0	31	16	2	0	19	1	3	74	76	10	113	123	165	147	60	87	50
TARA_038_MES_0.22-1.6	340	19.0351	64.5638	Deep	0	0	23	19	0	0	1	0	0	23	7	1	0	11	0	2	47	49	5	55	56	83	91	36	49	26
TARA_039_MES_0.22-1.6	270	18.7341	66.3896	Deep	0	0	33	19	0	0	0	0	0	26	10	2	0	22	0	2	55	57	11	71	81	118	105	44	73	34
TARA_056_MES_0.22-3	1000	-15.3379	43.2948	Deep	0	0	21	9	0	0	2	0	0	15	0	6	0	0	2	1	73	59	9	80	71	102	123	51	67	37
TARA_064_MES_0.22-3	1000	-29.5046	37.9599	Deep	0	0	13	13	0	0	1	0	0	16	1	6	0	1	2	0	45	35	7	43	36	64	74	32	51	23
TARA_065_MES_0.22-3	850	-35.1889	26.2905	Deep	0	0	30	9	0	0	1	0	0	11	1	6	0	0	2	0	69	59	10	78	63	106	124	53	65	27
TARA_068_MES_0.22-3	700	-31.0198	4.6685	Deep	0	0	18	16	0	0	0	0	0	9	4	5	1	0	0	0	63	62	17	89	74	147	119	50	66	37
TARA_068_MES_0.45-0.8	700	-31.0198	4.6685	Deep	0	0	33	17	0	0	1	0	0	16	3	6	0	1	1	0	76	66	21	85	79	133	144	53	70	40
TARA_070_MES_0.22-0.45	800	-20.4075	-3.1641	Deep	0	1	5	5	0	0	2	0	0	9	0	5	1	1	0	0	58	46	16	59	51	69	86	41	51	32
TARA_070_MES_0.22-3	800	-20.4075	-3.1641	Deep	0	0	27	17	0	0	2	1	0	20	1	6	1	0	2	1	61	46	19	78	65	95	116	43	67	36
TARA_070_MES_0.45-0.8	800	-20.4075	-3.1641	Deep	0	0	30	17	0	0	1	1	0	14	0	9	2	2	1	2	74	62	19	93	85	109	124	57	77	49
TARA_072_MES_0.22-3	800	-8.7986	-17.9034	Deep	0	0	1	13	0	0	1	0	0	17	2	10	0	3	0	0	49	40	13	50	63	71	95	38	52	26
TARA_076_MES_0.22-3	800	-20.9315	-35.1794	Deep	0	1	24	8	0	0	2	0	0	14	3	7	3	1	3	0	67	68	16	90	88	112	133	43	76	39
TARA_076_MES_0.45-0.8	800	-20.9315	-35.1794	Deep	0	0	29	15	0	0	1	3	0	18	3	6	1	1	3	1	76	60	17	88	80	111	123	53	86	51
TARA_078_MES_0.22-3	800	-30.1471	-43.2915	Deep	0	0	30	17	0	0	0	0	0	20	2	5	1	3	1	0	62	64	11	87	81	121	125	55	68	31
TARA_078_MES_0.45-0.8	800	-30.1471	-43.2915	Deep	0	0	23	13	0	0	0	1	0	15	2	7	5	3	1	0	61	52	17	68	66	100	100	41	57	42
TARA_098_MES_0.22-3	488	-25.8076	-111.691	Deep	0	0	24	16	0	0	2	0	0	15	4	4	0	0	3	1	70	56	11	77	80	128	140	48	81	29
TARA_102_MES_0.22-3	480	-5.261	-85.1678	Deep	0	0	18	31	0	0	2	0	1	24	3	9	0	8	0	0	97	71	15	93	74	132	145	67	80	43
TARA_109_MES_0.22-3	380	2.0649	-84.5546	Deep	0	0	16	24	0	0	2	0	0	23	2	5	0	6	1	0	78	49	17	73	79	128	148	53	68	36
TARA_110_MES_0.22-3	380	-1.8902	-84.6141	Deep	0	0	6	5	0	0	1	0	0	20	5	2	0	3	0	1	25	22	6	37	35	52	52	24	27	12
TARA_111_MES_0.22-3	350	-16.9486	-100.671	Deep	0	0	24	21	0	0	1	0	0	24	4	3	0	7	1	0	76	59	12	82	83	136	144	64	61	32
TARA_112_MES_0.22-3	696	-23.2232	-129.599	Deep	0	0	33	12	0	0	1	0	0	22	2	7	0	0	3	3	84	65	11	92	87	108	134	55	90	43
TARA_122_MES_0.22-0.45	600	-8.9729	-139.239	Deep	0	0	17	12	0	0	0	0	0	27	4	9	3	2	1	0	63	55	10	81	72	108	129	67	51	24
TARA_122_MES_0.22-3	600	-8.9729	-139.239	Deep	0	0	23	15	0	0	2	0	0	28	3	10	0	0	2	0	91	61	15	117	99	149	157	62	81	43
TARA_122_MES_0.45-0.8	600	-8.9729	-139.239	Deep	0	0	14	18	0	0	0	0	0	21	3	11	2	2	1	0	58	42	16	65	53	84	103	46	60	34
TARA_132_MES_0.22-3	550	31.528	-159.022	Deep	0	0	22	14	0	0	1	0	0	13	4	5	1	0	1	0	72	57	21	96	82	128	147	54	85	33
TARA_133_MES_0.22-3	650	35.2698	-127.727	Deep	0	0	24	24	0	0	1	0	0	14	1	8	0	6	2	1	72	70	18	98	88	132	142	62	71	39
TARA_137_MES_0.22-3	375	14.2025	-116.643	Deep	1	0	53	22	0	0	1	0	0	20	7	6	1	10	1	1	74	71	17	114	122	177	169	63	89	54
TARA_138_MES_0.22-3	450	6.3559	-103.06	Deep	2	0	70	21	0	0	1	0	0	20	10	8	2	28	1	5	71	70	17	101	119	157	129	67	85	45
TARA_142_MES_0.22-3	640	25.6236	-88.45	Deep	0	0	19	15	0	0	3	0	0	15	3	4	0	3	0	0	65	58	15	73	60	101	110	50	60	35
TARA_145_MES_0.22-3	590	39.2392	-70.0343	Deep	0	0	37	32	0	0	0	0	0	21	4	6	0	1	3	0	74	62	9	105	92	130	124	48	67	39
TARA_146_MES_0.22-3	640	34.6663	-71.2907	Deep	0	0	20	8	0	0	2	1	0	16	1	3	0	0	3	0	41	43	11	52	45	83	72	36	52	23
TARA_148b_MES_0.22-3	250	34.1504	-56.9684	Deep	0	0	41	20	0	0	1	0	0	17	1	0	0	3	2	0	95	97	21	124	143	191	187	71	107	58
TARA_149_MES_0.22-3	740	34.0771	-49.8233	Deep	0	0	17	14	0	0	2	0	0	18	2	4	0	1	3	0	55	57	8	67	56	97	108	42	54	25
TARA_152_MES_0.22-3	800	43.7182	-16.8714	Deep	0	0	32	19	0	0	1	0	0	16	2	2	0	0	2	0	67	71	8	92	67	118	129	57	71	33

## Sheet: Table S5
Table S5 Raw abundances of DMS/DMSP related genes in metatranscriptomes.
IMG Genome ID	Depth In Meters	Latitude	Longitude	Group	DsyB	MmtN	DddD	DddP	DddK	DddW	DddQ	DddL	DddY	DmdA	DMSOR	Tmm	DsoB	DdhA	DmoA	MddA	COG0012	COG0016	COG0018	COG0172	COG0215	COG0495	COG0525	COG0533	COG0541	COG0552
3300000368	0	38.8492	-75.1076	Non-polar-surface	0	0	0	0	0	0	0	0	0	0	0	0	0	0	0	0	0	0	0	0	0	0	0	0	0	0	0
3300003149	0	39.283	-76.611	Non-polar-surface	2	0	5	0	0	0	0	0	0	0	0	1	0	0	0	0	3	0	3	1	2	0	2	1	1	0	1.3
3300004636	150	48.6	-123.5	Non-polar-surface	0	0	0	0	0	0	0	0	0	2	2	1	0	6	0	0	9	10	0	6	9	18	19	7	20	3	10.1
3300004637	150	48.6	-123.5	Non-polar-surface	0	0	1	0	0	0	0	0	0	3	6	0	0	3	0	1	6	8	0	7	3	9	16	2	12	2	6.5
3300004638	135	48.6	-123.5	Non-polar-surface	0	0	0	2	0	0	0	0	0	8	3	1	0	12	0	0	9	10	0	12	13	22	17	6	25	9	12.3
3300004639	120	48.6	-123.5	Non-polar-surface	0	0	0	1	0	0	0	0	0	9	4	1	0	13	0	0	11	14	0	13	11	28	23	9	27	8	14.4
3300004640	135	48.6	-123.5	Non-polar-surface	1	0	1	1	0	0	0	0	0	7	7	1	0	7	0	0	12	10	2	12	16	18	27	7	27	8	13.9
3300004642	10	48.6	-123.5	Non-polar-surface	0	0	20	2	0	2	0	0	0	36	0	2	0	0	0	0	27	22	2	18	17	20	25	9	19	12	17.1
3300004954	120	48.6	-123.5	Non-polar-surface	0	0	0	0	0	0	0	0	0	2	0	0	0	0	0	0	1	0	0	0	0	0	0	0	2	0	0.3
3300004957	10	48.6	-123.5	Non-polar-surface	0	0	0	1	0	0	0	0	0	0	0	0	0	0	0	0	0	0	0	0	0	0	0	0	1	0	0.1
3300004958	120	48.6	-123.5	Non-polar-surface	0	0	0	0	0	0	0	0	0	2	1	2	0	2	0	0	1	1	0	0	1	0	2	0	7	0	1.2
3300004960	10	48.6	-123.5	Non-polar-surface	0	0	0	2	0	0	0	0	0	10	0	0	0	0	1	0	1	1	0	1	0	1	0	1	2	0	0.7
3300004962	100	48.6	-123.5	Non-polar-surface	0	0	0	0	0	0	0	0	0	4	0	0	0	0	0	0	1	0	0	0	0	2	0	1	3	0	0.7
3300004968	150	48.6	-123.5	Non-polar-surface	1	0	0	0	0	0	0	0	0	7	8	0	0	8	0	1	10	10	1	12	12	19	29	10	30	8	14.1
3300004975	100	48.6	-123.5	Non-polar-surface	0	0	2	19	2	0	0	0	0	14	1	6	0	1	0	0	3	11	0	8	8	8	14	1	19	1	7.3
3300005233	135	48.6	-123.5	Non-polar-surface	2	0	7	18	1	0	0	0	0	13	6	5	0	13	0	2	10	12	1	21	15	25	23	6	46	7	16.6
3300005234	100	48.6	-123.5	Non-polar-surface	0	0	2	14	3	0	0	0	0	43	0	10	1	0	0	0	13	14	3	14	13	16	25	7	27	3	13.5
3300018539	0.3	63.4954	19.8135	Non-polar-surface	0	0	0	0	0	0	0	0	0	0	0	0	0	0	0	0	0	0	0	0	0	0	0	0	0	0	0
3300018540	5	65.7305	22.445	Non-polar-surface	0	0	0	0	0	0	0	0	0	0	0	0	0	0	0	0	0	0	0	0	0	0	0	0	0	0	0
3300018541	5	65.7305	22.445	Non-polar-surface	0	0	0	0	0	0	0	0	0	0	0	0	0	0	0	0	0	0	0	0	0	0	0	0	0	0	0
3300018542	9	58.5812	18.2328	Non-polar-surface	0	0	0	0	0	0	0	0	0	0	0	0	0	0	0	0	0	0	0	0	0	1	0	0	0	0	0.1
3300018544	0.3	54.5702	11.3322	Non-polar-surface	0	0	0	0	0	0	0	0	0	0	0	0	0	0	0	0	0	0	0	0	0	1	0	0	0	0	0.1
3300018547	0.3	62.0971	18.5427	Non-polar-surface	0	0	0	0	0	0	0	0	0	1	0	0	0	0	0	0	0	0	0	0	0	1	0	0	0	0	0.1
3300018548	19	54.5702	11.3322	Non-polar-surface	0	0	0	0	0	0	0	0	0	0	0	0	0	0	0	0	1	1	0	0	0	0	2	2	1	0	0.7
3300018549	0.3	62.0971	18.5427	Non-polar-surface	0	0	0	0	0	0	0	0	0	0	0	0	0	0	0	0	0	0	0	0	0	0	0	0	0	0	0
3300018550	0.3	62.0971	18.5427	Non-polar-surface	0	0	0	0	0	0	0	0	0	0	0	0	0	0	0	0	0	1	0	0	0	1	0	0	0	0	0.2
3300018551	4	56.1664	16.3782	Non-polar-surface	0	0	0	0	0	0	0	0	0	0	0	0	0	0	0	0	0	0	0	1	0	2	0	0	0	0	0.3
3300018552	0.3	65.7305	22.445	Non-polar-surface	0	0	0	0	0	0	0	0	0	0	0	0	0	0	0	0	0	0	0	0	0	0	0	0	0	0	0
3300018553	9	58.5812	18.2328	Non-polar-surface	0	0	0	0	0	0	0	0	0	0	0	0	0	0	0	0	0	0	0	1	0	1	1	1	0	0	0.4
3300018554	10	62.0971	18.5427	Non-polar-surface	0	0	0	0	0	0	0	0	0	0	0	0	0	0	0	0	0	0	0	0	0	1	0	0	0	0	0.1
3300018557	0.3	54.5702	11.3322	Non-polar-surface	0	0	0	0	0	0	0	0	0	0	0	0	0	0	0	0	0	0	0	0	0	0	0	0	0	0	0
3300018558	10	62.0971	18.5427	Non-polar-surface	0	0	0	0	0	0	0	0	0	0	0	0	0	0	0	0	0	0	0	1	0	3	0	0	0	0	0.4
3300018559	0.3	54.5702	11.3322	Non-polar-surface	0	0	0	0	0	0	0	0	0	0	0	0	0	0	0	0	0	0	0	0	0	0	0	0	0	0	0
3300018560	74	58.5812	18.2328	Non-polar-surface	0	0	0	0	0	0	0	0	0	0	0	0	0	2	0	0	1	1	0	2	0	2	1	1	4	0	1.2
3300018561	15	54.5702	11.3322	Non-polar-surface	0	0	0	0	0	0	0	0	0	0	0	0	0	0	0	0	0	0	0	0	0	0	0	0	0	0	0
3300018563	15	54.5702	11.3322	Non-polar-surface	0	0	0	0	0	0	0	0	0	0	0	0	0	0	0	0	0	1	0	1	0	1	2	0	0	0	0.5
3300018565	0.3	65.7305	22.445	Non-polar-surface	0	0	0	0	0	0	0	0	0	0	0	0	0	0	0	0	1	1	0	0	0	0	0	0	0	0	0.2
3300018567	0.3	54.5702	11.3322	Non-polar-surface	0	0	0	0	0	0	0	0	0	0	0	0	0	0	0	0	0	0	0	0	0	0	0	0	0	0	0
3300018569	74	58.5812	18.2328	Non-polar-surface	0	0	0	1	0	0	0	0	0	0	0	0	0	0	0	1	5	3	0	4	3	6	7	1	10	2	4.1
3300018572	74	58.5812	18.2328	Non-polar-surface	0	0	0	0	0	0	0	0	0	1	0	0	0	1	0	0	5	4	0	3	2	4	3	2	9	4	3.6
3300018574	9	58.5812	18.2328	Non-polar-surface	0	0	0	0	0	0	0	0	0	0	0	0	0	0	0	0	1	0	0	0	0	0	0	0	0	0	0.1
3300018599	0.3	62.0971	18.5427	Non-polar-surface	0	0	0	0	0	0	0	0	0	0	0	0	0	0	0	1	6	0	0	0	1	0	0	0	0	0	0.7
3300018601	0.3	56.1664	16.3782	Non-polar-surface	1	0	0	0	0	0	0	0	0	0	0	0	0	0	0	0	2	0	0	0	0	0	0	0	0	0	0.2
3300018610	5	58.5812	18.2328	Non-polar-surface	0	0	0	0	1	0	0	0	0	8	0	2	0	0	0	0	2	1	0	0	0	0	1	0	3	1	0.8
3300018613	0.3	54.5702	11.3322	Non-polar-surface	0	0	0	0	1	0	0	0	0	5	0	0	0	0	0	0	2	2	1	0	2	2	3	1	4	2	1.9
3300018614	74	58.5812	18.2328	Non-polar-surface	1	0	0	0	0	0	0	0	0	4	0	1	0	0	0	0	2	0	2	0	0	0	1	0	0	0	0.5
3300018619	0.3	54.5702	11.3322	Non-polar-surface	0	0	0	0	3	0	0	0	0	9	0	1	0	0	0	0	6	6	2	3	6	5	7	4	5	3	4.7
3300018622	15	54.5702	11.3322	Non-polar-surface	0	0	0	0	0	0	0	0	0	0	0	1	0	0	0	0	0	0	0	0	0	0	0	0	0	0	0
3300018629	0.3	54.5702	11.3322	Non-polar-surface	0	0	0	0	1	0	0	0	0	3	0	0	0	0	0	0	7	9	0	4	2	1	3	0	4	1	3.1
3300018632	0.3	54.5702	11.3322	Non-polar-surface	0	0	0	0	4	0	0	0	0	9	0	1	0	0	0	0	4	5	2	1	4	1	4	2	5	1	2.9
3300018633	0.3	54.5702	11.3322	Non-polar-surface	0	0	0	0	1	0	0	0	0	7	0	1	0	0	0	0	1	3	1	0	1	0	1	3	3	1	1.4
3300018640	0.3	54.5702	11.3322	Non-polar-surface	0	0	0	0	2	0	0	0	0	11	0	1	0	0	0	0	4	1	1	1	2	2	2	0	3	1	1.7
3300018642	19	54.5702	11.3322	Non-polar-surface	0	0	0	2	0	0	0	0	0	12	0	1	0	0	0	0	2	3	0	2	1	6	3	1	2	1	2.1
3300018665	0.3	58.5812	18.2328	Non-polar-surface	0	0	0	0	3	0	1	0	0	10	1	2	0	0	0	0	4	4	0	1	3	4	2	0	6	0	2.4
3300018682	4	56.1664	16.3782	Non-polar-surface	0	0	8	2	2	0	1	0	0	15	0	2	0	0	0	0	21	24	3	29	30	20	32	19	28	14	22
3300018687	90	58.5812	18.2328	Non-polar-surface	1	0	0	0	0	0	0	0	0	6	0	1	0	0	0	0	4	1	1	4	1	1	3	0	5	1	2.1
3300018775	0.3	56.1664	16.3782	Non-polar-surface	0	0	0	2	0	0	0	0	0	13	1	1	0	0	0	0	12	7	1	12	6	11	18	3	14	3	8.7
3300018824	0.3	54.5702	11.3322	Non-polar-surface	0	0	0	0	2	0	0	0	0	13	2	1	0	0	0	0	9	3	2	2	1	2	9	1	9	2	4
3300019056	0.3	65.7305	22.445	Non-polar-surface	0	0	0	0	0	0	0	0	0	0	0	0	0	0	0	0	0	0	0	0	0	0	0	0	0	0	0
3300019059	0.3	54.5702	11.3322	Non-polar-surface	0	0	0	0	1	0	0	0	0	0	0	0	0	0	0	0	0	0	0	0	0	0	0	0	0	0	0
3300019060	4	56.1664	16.3782	Non-polar-surface	0	0	0	0	0	0	0	0	0	0	0	0	0	0	0	0	0	0	0	1	0	1	0	0	0	0	0.2
3300019062	0.3	65.7305	22.445	Non-polar-surface	0	0	0	0	0	0	0	0	0	0	0	0	0	0	0	0	0	0	0	0	0	0	0	0	0	0	0
3300019063	0.3	56.1664	16.3782	Non-polar-surface	0	0	0	0	0	0	0	0	0	0	0	0	0	0	0	0	0	0	0	0	0	0	0	0	0	0	0
3300019064	0.3	56.1664	16.3782	Non-polar-surface	0	0	0	0	0	0	0	0	0	0	0	0	0	0	0	0	0	0	0	0	0	0	0	0	0	0	0
3300019066	5	65.7305	22.445	Non-polar-surface	0	0	0	0	0	0	0	0	0	0	0	0	0	0	0	0	0	0	0	0	0	0	0	0	0	0	0
3300019073	0.3	54.5702	11.3322	Non-polar-surface	0	0	0	0	0	0	0	0	0	4	0	0	0	0	0	0	0	0	0	1	1	1	0	0	3	1	0.7
3300019076	0.3	54.5702	11.3322	Non-polar-surface	0	0	0	0	0	0	0	0	0	0	0	0	0	0	0	0	0	0	0	0	0	0	0	0	0	0	0
3300019077	19	54.5702	11.3322	Non-polar-surface	0	0	0	0	0	0	0	0	0	2	0	0	0	0	0	0	0	0	0	0	0	0	1	1	0	0	0.2
3300019081	10	62.0971	18.5427	Non-polar-surface	0	0	0	0	0	0	0	0	0	0	0	0	0	0	0	1	3	0	0	0	0	0	0	0	0	0	0.3
3300019083	4	56.1664	16.3782	Non-polar-surface	0	0	0	0	0	0	0	0	0	0	0	0	0	0	0	0	0	0	0	0	0	0	0	0	0	0	0
3300019085	5	65.7305	22.445	Non-polar-surface	0	0	0	0	0	0	0	0	0	0	0	0	0	0	0	0	0	0	0	0	0	0	0	0	0	0	0
3300019089	0.3	54.5702	11.3322	Non-polar-surface	0	0	0	0	1	0	0	0	0	6	0	1	0	0	0	0	6	5	3	2	3	3	3	3	3	1	3.2
3300019095	0.3	54.5702	11.3322	Non-polar-surface	0	0	0	0	0	0	0	0	0	0	0	1	0	0	0	1	4	0	1	0	0	1	0	0	1	1	0.8
3300019096	10	62.0971	18.5427	Non-polar-surface	0	0	3	1	1	0	2	0	0	12	0	1	0	0	0	0	11	20	5	13	22	17	23	17	18	11	15.7
3300019098	15	54.5702	11.3322	Non-polar-surface	0	0	0	3	1	0	0	0	0	9	0	1	0	0	0	0	2	1	0	1	1	2	7	0	6	1	2.1
3300019113	0.3	54.5702	11.3322	Non-polar-surface	0	0	0	0	1	0	0	0	0	3	0	0	0	0	0	0	0	1	0	0	0	0	0	0	0	0	0.1
3300019114	0.3	54.5702	11.3322	Non-polar-surface	0	0	0	0	2	0	0	0	0	12	1	1	0	0	0	0	5	5	1	1	3	3	9	2	7	1	3.7
3300019122	9	58.5812	18.2328	Non-polar-surface	0	0	4	1	3	0	3	0	0	14	0	3	0	0	1	0	23	16	3	18	31	25	28	22	19	16	20.1
3300019146	0.3	54.5702	11.3322	Non-polar-surface	0	0	0	0	3	0	0	0	0	14	0	2	0	0	0	0	8	4	1	2	3	8	6	3	12	2	4.9
3300019149	19	54.5702	11.3322	Non-polar-surface	3	0	0	0	0	0	0	0	0	8	0	6	0	0	0	2	8	0	6	4	0	0	5	1	0	0	2.4
3300028671	10	50	-145	Non-polar-surface	1	0	6	5	2	0	1	0	0	106	4	9	0	0	0	0	34	30	5	23	19	25	65	11	36	8	25.6
3300028672	10	50	-145	Non-polar-surface	1	0	2	4	5	0	2	0	0	100	4	15	0	0	0	0	42	33	10	24	24	35	60	15	42	12	29.7
3300031056	150	-5.7	-26	Non-polar-surface	1	0	0	0	0	0	0	0	0	53	0	12	0	0	0	2	10	1	2	2	1	1	13	0	1	0	3.1
3300031113	150	-22.5	-33	Non-polar-surface	3	0	0	1	0	0	0	0	0	70	0	19	0	0	0	4	16	0	9	4	4	0	24	0	1	0	5.8
3300031121	150	-2.7	-28.5	Non-polar-surface	0	0	1	0	0	0	0	0	1	42	0	20	0	0	0	5	21	0	10	2	2	1	14	0	1	0	5.1
3300004627	200	48.6	-123.5	Non-polar-Deep	0	0	0	0	0	0	0	0	0	1	6	0	0	3	0	0	6	7	0	10	7	12	18	5	17	4	8.6
3300004641	200	48.6	-123.5	Non-polar-Deep	0	0	1	0	0	0	0	0	0	4	4	1	0	3	0	1	8	12	0	12	11	18	20	7	24	3	11.5
3300004974	200	48.6	-123.5	Non-polar-Deep	0	0	2	1	0	0	0	0	0	5	11	0	0	1	0	0	7	9	1	11	8	18	14	6	25	3	10.2
3300018570	3259	34.4	22.08	Non-polar-Deep	0	0	0	0	0	0	0	0	0	0	1	0	0	0	4	0	3	1	0	3	1	1	3	1	3	1	1.7
3300018573	3259	34.4	22.08	Non-polar-Deep	0	0	0	3	0	0	0	0	0	1	2	0	0	1	2	0	5	2	0	3	0	3	0	0	11	2	2.6
3300018595	3262	34.4	22.08	Non-polar-Deep	0	0	0	0	0	0	0	0	0	0	0	0	0	0	4	0	1	3	1	1	1	4	1	1	4	1	1.8
3300018620	2200	36.29	15.39	Non-polar-Deep	0	0	0	3	0	0	0	0	0	3	0	2	0	1	3	0	0	2	0	2	4	7	6	5	3	1	3
3300018624	2200	36.29	15.39	Non-polar-Deep	0	0	0	2	0	0	0	0	0	2	0	1	0	1	6	0	2	3	0	2	1	4	6	2	2	2	2.4
3300018843	200	58.5812	18.2328	Non-polar-Deep	0	0	0	0	0	0	0	0	0	1	1	0	0	0	0	1	6	4	0	1	1	3	6	0	6	2	2.9
3300019072	2200	36.29	15.39	Non-polar-Deep	0	0	0	2	0	0	0	0	0	2	0	1	0	0	3	0	2	2	0	4	1	2	4	0	3	2	2
3300019090	2200	36.29	15.39	Non-polar-Deep	0	0	0	1	0	0	0	0	0	0	0	2	0	0	4	0	4	1	0	5	3	4	4	1	3	3	2.8
3300019110	3262	34.4	22.08	Non-polar-Deep	0	0	0	0	0	0	0	0	0	0	0	0	0	0	41	0	7	6	3	2	5	12	14	13	5	3	7
3300029637	2000	50	-145	Non-polar-Deep	0	0	0	0	0	0	0	0	0	9	0	0	0	0	0	0	2	0	0	0	0	0	1	0	2	0	0.5
3300029645	1000	50	-145	Non-polar-Deep	0	0	0	1	0	0	0	0	0	1	0	0	0	0	0	0	1	0	0	0	0	0	0	0	5	0	0.6
3300012413	0	-64.7711	-64.056	Polar-surface	3	0	20	12	7	0	2	0	0	76	8	16	0	0	0	0	66	40	7	32	26	45	91	19	59	18	40.3
3300012414	0	-64.7711	-64.056	Polar-surface	2	0	16	9	5	0	0	0	0	94	6	18	0	0	1	1	66	34	17	39	25	49	114	15	43	18	42
3300012415	0	-64.7711	-64.056	Polar-surface	4	0	19	6	6	0	2	0	0	112	7	21	0	0	0	0	72	40	18	33	30	53	122	20	53	19	46
3300012767	0	-64.7711	-64.056	Polar-surface	1	0	2	2	3	0	0	0	0	40	0	5	0	0	0	0	18	13	2	6	5	15	25	3	16	3	10.6
3300012782	0	-64.7711	-64.056	Polar-surface	2	0	10	4	7	0	0	0	0	88	8	19	0	0	0	0	53	28	14	24	19	39	85	15	37	11	32.5
3300012935	0	-64.7711	-64.056	Polar-surface	3	0	17	11	5	0	2	0	0	98	6	18	0	0	0	0	67	51	13	31	33	54	88	22	52	24	43.5
3300030715	24	70.5467	-122.908	Polar-surface	0	0	10	3	2	0	0	0	0	36	0	4	1	0	0	0	14	10	1	6	1	5	16	3	9	2	6.7
3300030720	5	75.0007	-150.003	Polar-surface	0	0	3	0	0	0	0	0	0	34	2	3	1	0	0	1	14	8	5	11	3	11	20	4	12	3	9.1
3300030721	20	74.0136	-139.597	Polar-surface	0	0	5	0	3	0	0	0	0	31	2	6	2	0	0	1	11	9	2	8	7	10	18	4	10	4	8.3
3300030722	81	75.0007	-150.003	Polar-surface	2	0	23	7	0	0	0	0	0	55	3	6	1	0	3	0	19	18	6	14	12	18	23	9	29	5	15.3
3300030723	5	70.5467	-122.908	Polar-surface	0	0	13	1	0	0	0	0	0	33	0	2	0	0	0	0	9	2	0	2	1	0	6	1	8	2	3.1
3300030724	20	75.0007	-150.003	Polar-surface	0	0	14	0	3	0	0	0	0	43	2	1	1	0	0	0	18	10	5	13	5	12	19	5	17	2	10.6
3300030725	20	70.5467	-122.908	Polar-surface	0	0	9	3	1	0	0	0	0	36	0	3	2	0	0	0	15	11	1	3	2	2	10	4	6	3	5.7
3300030726	49	70.5467	-122.908	Polar-surface	0	0	11	3	0	0	0	1	0	51	1	4	2	0	2	0	18	25	6	10	10	15	13	6	23	5	13.1
3300030728	146	75.0007	-150.003	Polar-surface	3	0	58	23	2	0	1	2	0	56	4	3	0	0	4	1	20	24	5	16	28	35	35	19	64	15	26.1
3300030729	139	74.0136	-139.597	Polar-surface	1	0	42	24	0	0	0	2	0	53	5	2	0	0	4	0	12	18	3	13	23	33	26	19	53	8	20.8
3300031340	86	80.9595	-132.184	Polar-surface	1	0	15	6	0	0	0	1	0	32	4	2	0	0	0	2	11	11	0	7	13	14	12	4	38	4	11.4
3300031378	139	80.9595	-132.184	Polar-surface	0	0	24	10	0	0	0	1	0	27	0	1	0	0	0	1	10	4	0	5	13	4	10	3	27	5	8.1
3300031540	20	77.9995	-150.006	Polar-surface	0	0	34	0	4	0	0	0	0	45	2	8	2	0	0	0	10	12	4	7	5	7	13	6	17	4	8.5
3300031542	5	80.9595	-132.184	Polar-surface	0	0	8	2	2	0	0	0	0	59	0	6	1	0	2	0	21	14	5	11	5	6	15	7	17	3	10.4
3300031556	66	77.9995	-150.006	Polar-surface	0	0	33	2	2	0	0	0	0	71	1	6	3	0	2	1	24	26	5	18	10	11	17	11	27	4	15.3
3300031557	20	80.9595	-132.184	Polar-surface	0	0	18	2	3	0	0	0	0	52	1	3	1	0	0	0	18	9	1	8	3	8	13	4	13	1	7.8
3300031558	45	80.9595	-132.184	Polar-surface	0	0	13	4	1	0	0	0	0	58	0	6	2	0	1	0	10	15	2	7	6	8	15	2	18	4	8.7
3300031570	5	77.9995	-150.006	Polar-surface	0	0	15	3	3	0	0	0	0	49	4	9	1	0	0	2	15	14	4	12	8	11	29	10	22	8	13.3
3300031571	121	77.9995	-150.006	Polar-surface	1	0	21	12	0	0	0	1	0	33	2	6	0	0	1	0	14	14	0	6	17	22	18	8	38	6	14.3
3300031579	5	74.0136	-139.597	Polar-surface	0	0	12	4	5	0	0	0	0	78	8	13	1	0	0	1	27	20	8	19	14	21	39	11	28	12	19.9
3300031580	83	74.0136	-139.597	Polar-surface	2	0	24	15	4	0	0	1	0	64	11	10	1	1	3	0	29	18	7	28	19	28	30	10	42	6	21.7
3300031581	74	70.5467	-122.908	Polar-surface	0	0	18	8	1	0	0	1	0	63	1	7	2	0	1	1	28	15	4	9	13	21	27	8	29	4	15.8
3300035288	5	-46.5954	142.031	Polar-surface	0	0	5	10	4	0	1	0	0	124	6	16	0	0	0	0	21	33	3	26	16	26	46	13	34	8	22.6
3300035290	5	-46.5954	142.031	Polar-surface	2	0	13	11	8	0	2	1	0	191	17	20	0	0	1	0	46	54	8	45	35	57	75	24	50	24	41.8
3300035291	5	-46.5954	142.031	Polar-surface	0	0	8	10	6	0	1	0	0	132	8	16	0	0	0	0	33	37	8	36	29	32	44	14	38	14	28.5
3300035292	5	-46.5954	142.031	Polar-surface	2	0	8	12	9	0	1	0	0	177	8	26	0	0	0	0	50	54	9	45	40	46	80	21	47	19	41.1
3300035293	5	-46.5954	142.031	Polar-surface	1	0	14	9	5	0	1	1	0	179	14	22	0	0	0	0	45	42	9	50	39	44	74	26	61	26	41.6
3300035294	5	-46.5954	142.031	Polar-surface	0	0	7	10	3	0	2	0	0	136	7	13	0	0	1	0	32	34	5	31	28	34	47	18	48	14	29.1
3300035406	5	-46.5954	142.031	Polar-surface	0	0	10	9	3	0	2	1	0	145	3	14	0	0	0	0	33	40	4	30	28	34	57	19	50	15	31
3300035439	5	-46.5954	142.031	Polar-surface	0	0	13	13	7	0	2	2	0	224	14	22	0	0	1	0	46	59	6	44	44	61	83	30	74	27	47.4
3300035440	5	-46.5954	142.031	Polar-surface	2	0	9	11	4	0	1	0	0	165	15	23	0	0	0	0	34	47	10	43	35	55	77	23	55	26	40.5
3300035441	5	-46.5954	142.031	Polar-surface	1	0	15	18	7	0	2	0	0	170	8	22	0	0	1	0	47	53	5	43	41	50	81	27	57	24	42.8
3300035442	5	-46.5954	142.031	Polar-surface	1	0	12	11	7	0	0	1	0	190	14	28	0	0	0	0	46	58	8	45	35	50	90	26	61	27	44.6
3300035443	5	-46.5954	142.031	Polar-surface	2	0	13	16	5	0	1	0	0	202	14	26	0	0	0	0	62	64	11	70	48	65	100	41	79	31	57.1
3300035444	5	-46.5954	142.031	Polar-surface	1	0	15	10	4	0	1	0	0	175	13	16	0	0	0	0	53	55	9	53	40	59	92	27	76	27	49.1
3300035555	5	-46.5954	142.031	Polar-surface	0	0	7	13	2	0	2	2	0	136	12	15	0	0	0	0	35	32	7	33	24	35	61	17	46	15	30.5
3300030727	200	77.9995	-150.006	Polar-Deep	1	0	31	11	0	0	1	1	0	27	1	3	0	0	1	0	10	8	0	8	14	13	16	6	36	6	11.7
3300031496	216	74.0136	-139.597	Polar-Deep	1	0	30	10	0	0	0	1	0	20	0	4	0	0	2	0	12	7	1	5	13	8	14	5	28	4	9.7
3300031559	223	75.0007	-150.003	Polar-Deep	1	0	48	16	0	0	0	2	0	43	4	5	0	0	1	1	16	9	2	11	19	19	29	10	42	11	16.8
3300032127	370	77.9995	-150.006	Polar-Deep	0	0	96	28	0	0	0	1	0	66	7	9	0	1	5	2	14	21	1	26	59	31	47	19	76	22	31.6
3300032145	1000	80.9595	-132.184	Polar-Deep	0	0	104	19	0	0	0	0	0	51	9	6	0	0	14	2	15	32	1	27	58	38	45	24	86	30	35.6
3300032146	370	80.9595	-132.184	Polar-Deep	0	0	61	16	0	0	0	1	0	50	7	6	0	1	7	2	8	17	0	14	26	19	21	9	50	9	17.3
3300032149	1000	75.0007	-150.003	Polar-Deep	0	0	62	8	0	0	0	0	0	29	6	2	0	0	10	1	7	11	0	10	36	21	26	14	33	19	17.7
3300032161	497	75.0007	-150.003	Polar-Deep	0	0	31	8	0	0	0	0	0	18	3	1	0	0	2	0	5	12	1	10	12	11	10	4	19	10	9.4
3300034481	479	74.0136	-139.597	Polar-Deep	0	0	5	0	0	0	0	0	0	5	1	1	0	0	0	0	1	0	0	1	6	1	1	0	7	2	1.9
3300034679	1000	74.0136	-139.597	Polar-Deep	0	0	46	12	0	0	0	0	0	21	5	5	0	0	13	0	9	13	1	14	31	29	26	18	40	15	19.6

## Sheet: Table S6
Table S6 The predicted hits with enzymatic activity.
Figure	Hits ID	Gene ID in polar metagenomes	e-value	Activity assay					Protein sequences
				Reaction system	Phenotypes	Reaction condition	Product	Method
a	DddD-1	gene_168074|GeneMark.hmm|837_aa|-|9062|11575	0	100 mM tris-HCl (pH 8.0), 2 mM DMSP, 1 mM acetyl-CoA, 0.1 mg lysate	+	25℃, 12 h	DMS	GC	MVGNTRDKLPLHGVKVVDFGQYIAGPAVAMILGDLGATVVHIDPPGGPLWQSPANATLNRNKLIVTIDLKSPEGLEQALALIAEADIVIENFRPGKLEALKIDFAVLRQERPELITLSIPGFASNDEERRELRAYESIIAASSGVFTDMGLNRVLMGVNPSFSPLPLASAYGAMLAASAAVLALQARERTGLGDHIEVPLASAVMEGLCYNSIQIDGLPARYITQREQEIARRRTEGLPMNLAYEELQELLDPFYRSYLCKDGRMFYVVCPSHKHHAKRCLQALGIYEELVADGLMEEEDTYLPTSEWKSDVSLGVYPLPKFWADKIAARMKQVFLTRTAKEWERIFGRGGFPGAPQRWLQEWINDDHAETAGLMIDVQDPEYGTMIQPGPVVWLEESG…
	DddD-2	gene_1043666|GeneMark.hmm|833_aa|+|1377|3878	2.7e-74		+				MTVSSAPADLAGARRPLEGLRVVDFSRMMSGPLSTMIMGDLGAHVIRVEDLEGTDTTRHNHPFINGESHYFLSLNRNKESIALDLKTEAGRRIAVDLVRQADIVVENFRHGVAARLGLDYDSLIKVNPRLVYCSVTGFGQTGPWSEHPAYDLVIQAVTGALSVTGEAGRPPAKMGLPLADEMSSLFAGIAMLAGIERRERTGLGCYLDISMYDAGISMLSYMANIYFATGESPTAQGSSHPTIYPYNAFETADGFIVVAPFTNAFWRKFCAVIERPDLPDDPRYKLFADRLANRSELAAILDPIMKTRPSAYWLAALDKGDVPNGPVAKVDEVLEGEHTHARGMVVEIDHPVCGRIRSLGTPFHFNYPDGSAFRPSYAPQPVVGQHSASILEKLLGYSP…
b	DmdA-1	gene_1268425|GeneMark.hmm|369_aa|-|338|1447	5.9e-189	100 mM tris-HCl (pH 8.0), 2 mM DMSP, 0.1 mg enzyme	+	30℃, 1 h	MMPA	HPLC; C18 column; HPLC buffer : 2.5% acetonitrile, 0.2% phosphoric acid in double-distilled H2O; flow rate of 1.0 ml/min	MKNFSIAKSRRLRSTPYTSRIEKQGVTAYTIYNHMLLPAAFGSIEDSYKHLKEHVQVWDVAAERQVEISGKDSAELVQLMTCRDLSKSKIGRCYYCPIIDENGNLVNDPVVLKLDENKWWISIADSDVIFFAKGLASGHKLDVKIVEPVVDIMAIQGPKSFALMEKVFGKKITELKFFGFDYFDFEGTKHLIARSGWSKQGGYEVYVQNPQLGQKLYDHLFEVGKEFNVGPGCPNLIERIESALLSYGNDFDNNDNPFECGFDQYVSLDSDINFLGKEKLKEIKLKGPKKKLRGVKIDIKEISLTGSKNIYDENNNIIGELRSACYSPHFQKVIGIAMVQKSHWEASQSFKIQINDNTINGNVCDLPFI
c	DddK-1	gene_161982|GeneMark.hmm|130_aa|+|535|927	5.3e-80	100 mM tris-HCl (pH 8.0), 2 mM DMSP, 0.1 mg enzyme	+		Acrylate		MIFVKNLASVSDQEWSSTEKYPGVRWKFLIDSDFDGSSGLSLGFAEIAPGGDLTLHYHSPAEIYVVTNGTGILNKSGELETIKKGDVVYIAGNAEHALKNNGKETLEFYWIFPTDRFSEVEYFSSKQDSA
	DddK-2	gene_239210|GeneMark.hmm|130_aa|+|2|394	1.5e-74		+				MIFVKNLASVSDQEWSSTEKYPGVRWKFLIDADFDGSSNLSVGFAQIAPGGNLTLHYHSHAEIYVVTNGIGILNKSGELETIKKGDVVYIAGNTEHALKNNEKETLEFYWIFPTDSFSEVEYFPTKQESV
d	DddP-1	gene_1616540|GeneMark.hmm|447_aa|-|3092|4435	5.1e-248		+				MNRHYRDTRKIDPTRGDRLGDNTPNDADRIEIGPTQMAYAEWAQAGLELPDLQVMRRFRWERLTAAVVARDYAGLLMFDPLNIRYATDSTNMQLWNTHNPFRAVLLCADGYMVIWDYKNSPFLSSFNPLVREARSGADLFYFDRGDKVDVAADVFARDVAALLAEHAPGNRRLAVDKVMLHGLRALEAQGLQIMEGEEVTEKTRAVKGPDEIRAMRCASHACEAAVAEMERFARAAVPGGGVSEDDIWAELHAGNIRRGGEWIETRLLASGPRSNPWFQECGPRIVQNNEIVAFDTDLIGSYGICVDISRTWWIGDARPRADMVAAMRHAHEHIQANMEMLRPGVTIPELIAGCHRLEEKYQAQKYGCMMHGVGLCDEWPLVAYPDKAVAGAFDYALEP…
	DddP-2	gene_757910|GeneMark.hmm|438_aa|-|568|1884	2.3e-34		+				MTKHDSHAEALQRDFPAAPLVPALDFARRGIPSHGHSAVDFEQRANFDRLREYRISRAVESLEASGCGAFLLFDFYNIRYTTQTWIGGALGDKMSRYALLTRDRKPYLWDFGSAAKHHKLFAPWLEPERSMAGMLGLRGAIHPDVGLMRDAVTTIKGILTDAGVAEEPIGVDIVEPEFLFEMQRQGLKVVDIQQSMLDARSIKSVDEIMLLNQAASMVDGVYQDIVNVLQPGIRENEIVALASKRLYELGSEQVEAINAVSGERCNPHPHNFTDRIIRPGDQAFFDIIHSFNGYRTCYYRTFSVGYSTQPQIDAYARAREWMDAAIQNVADGVGTDQIARLWPKATDLGFANEMDAFGLQFGHGLGLGLHERPIISRLNSIDHPVEIKTGMVFALETYC…
e	Tmm-1	gene_175239|GeneMark.hmm|443_aa|+|809|2140	7.4e-260	100 mM tris-HCl (pH 8.0), 0.5 mM DMS, 0.25 mM NADPH, 0.1 mg enzyme	+		NADP+	Decrease in absorbance at 340 nm of NADPH	MTKVAIIGAGPCGLSALRSFEQAEKKGEKIPEIICFDKQEDWGGLWNYSWRTGSDQYGDPVPNSMYRYLWSNGPKECLEFADYSFDEHFGKPIPSFPPREVLYDYILGRAKKGNLKSKIKFNTSVTNVSYEGNSFEVTYRDKKNDKISKDIFDYVIVSTGHFSVPFIPEYPGMKAFPGRIMHSHDFRDAEEFRGKNVVVLGSSYSAEDVALQCHKYGAKSVTIGYRHNPMGFKWPEGMKEVFHLDRLEGNKAIFKDGHVQETDAIILCTGYLHHFPFITEDLKLKTGNSLYPPKLYKGVVWQNNHKLIYLGMQDQFHTFNMFDCQAWFARDVIMGKIKVPNDSEIEKDINKWVSLEEKLENADQMIDFQTEYTKELHDLSDYPKIDFELIRKTFKEWEH…
	Tmm-2	gene_884575|GeneMark.hmm|450_aa|+|712|2064	1.6e-226		+				MCVIGAGPSGLAQLRAFQSDADKGHTDVEVVCYEKQSDWGGLWRYSWRTGIDEYGNPCHGSMYRYLWSNGPKEGLEFADYTFDEHFGKPIASFPPRAVLMDYIEGRVKKANVRDAIQFSTIVRDVRAVGDQFEVTVRDCVQDCETTETFDHVVVASGHFSVPNVPHYDGFESFKGRILHAHDFREAREFADKDILILGTSYSAEDIGSQCWKYGCKSVTVAHRTAPMGYDWPENWKEVPALSHVIDRTAHFIDDTSKDIDAIILCTGYKHHFPFLPDALRLKTGNVLASDDLYKGVVWNHNPNLFYLGMQDQWYTFNMFDAQAWYVRDIIMGRIQVPDLAARQADVAQRQADEAALADDCACIAYQGNYTKELIDETDYPCFDIEAANKAFYEWKKNKK…

## Sheet: Table S7
Table S7 Biplot scores for constraining variables.
Protein	Polar ocean		Non-polar ocean
	RDA1	RDA2	RDA1	RDA2
DsyB	0.0310257	0.0073175	0.0392814	0.0118553
MmtN	0.00971767	0.0301964	0.0215112	-0.0157488
DddD	0.401345	0.100802	0.812437	-0.237797
DddP	0.331899	-0.326848	0.0712425	0.288556
DddK	-0.655272	0.186325	-0.279107	-0.19814
DddW	0.0579039	0.198205	0	6.87974e-17
DddQ	-0.085562	-0.0450781	-0.267718	0.0252915
DddL	0.0571026	-0.0168756	0.043216	-0.00947829
DddY	-0.0116429	0.0349819	-0.0162697	-0.00210668
DmdA	-0.308978	-0.171767	-0.718591	-0.0607848
DMSOR	-0.0105334	0.069985	-0.185623	0.100173
Tmm	-0.204437	-0.027823	-0.0418646	0.0729704
DsoB	0.0868205	0.157023	0.165794	-0.104406
DdhA	0.275299	0.154762	0.350763	0.400355
DmoA	0.25896	0.0423003	0.269494	-0.103207
MddA	0.270819	0.186173	0.130113	0.0539405

## Sheet: Table S8
Table S8 Taxonomy composition of DMS/DMSP related genes in polar ocean samples.
ID	DddD	DddK	DddL	DddP	DddQ	DddW	DddY	DdhA	DmdA	DmoA	DMSOR	DsoB	DsyB	MddA	MmtN	Tmm
no_rank	14	0	1	67	0	0	0	0	26	1	2	5	0	0	0	112
superkingdom_Archaea;phylum_Euryarchaeota;	1	0	0	0	0	0	0	0	0	0	0	0	0	0	0	0
superkingdom_Archaea;phylum_Thaumarchaeota;	0	0	0	11	0	0	0	0	18	0	0	0	0	0	0	0
superkingdom_Archaea;phylum_Thaumarchaeota;order_Nitrosopumilales;family_Nitrosopumilaceae;genus_Nitrosopumilus;	0	0	0	0	0	0	0	0	0	0	0	0	0	0	0	0
superkingdom_Bacteria;	0	0	0	6	0	0	0	2	159	0	4	1	0	0	0	1
superkingdom_Bacteria;phylum_Acidobacteria;	75	0	0	1	0	0	0	0	0	0	0	0	0	13	0	0
superkingdom_Bacteria;phylum_Acidobacteria;class_Acidobacteriia;order_Acidobacteriales;family_Acidobacteriaceae;genus_Acidipila;	0	0	0	0	0	0	0	0	0	0	0	0	0	1	0	0
superkingdom_Bacteria;phylum_Acidobacteria;class_Blastocatellia;	0	0	0	0	0	0	0	0	0	0	0	0	0	2	0	0
superkingdom_Bacteria;phylum_Acidobacteria;class_Blastocatellia;order_Blastocatellales;family_Pyrinomonadaceae;	0	0	0	0	0	0	0	0	0	0	0	0	0	2	0	0
superkingdom_Bacteria;phylum_Acidobacteria;class_Thermoanaerobaculia;	0	0	0	0	0	0	0	0	0	0	0	0	0	0	0	0
superkingdom_Bacteria;phylum_Acidobacteria;class_Vicinamibacteria;	0	0	0	0	0	0	0	0	0	0	0	0	0	3	0	0
superkingdom_Bacteria;phylum_Actinobacteria;class_Acidimicrobiia;	67	0	0	71	0	0	0	0	66	0	0	0	0	0	0	21
superkingdom_Bacteria;phylum_Actinobacteria;class_Acidimicrobiia;order_Acidimicrobiales;	3	0	0	0	0	0	0	0	0	1	0	0	0	0	0	0
superkingdom_Bacteria;phylum_Actinobacteria;class_Acidimicrobiia;order_Acidimicrobiales;family_Acidimicrobiaceae;	198	0	0	69	0	0	0	0	59	16	22	0	0	0	0	29
superkingdom_Bacteria;phylum_Actinobacteria;class_Acidimicrobiia;order_Acidimicrobiales;family_Ilumatobacteraceae;	0	0	0	1	0	0	0	0	0	0	0	0	0	0	0	0
superkingdom_Bacteria;phylum_Actinobacteria;class_Acidimicrobiia;order_Acidimicrobiales;family_Ilumatobacteraceae;genus_Ilumatobacter;	3	0	0	22	0	0	0	0	3	0	0	0	0	0	0	0
superkingdom_Bacteria;phylum_Actinobacteria;class_Actinomycetia;	50	0	0	46	0	0	0	1	3	1	4	0	0	0	0	15
superkingdom_Bacteria;phylum_Actinobacteria;class_Actinomycetia;order_Actinomycetales;	4	0	0	8	0	0	0	0	0	0	0	0	0	0	0	0
superkingdom_Bacteria;phylum_Actinobacteria;class_Actinomycetia;order_Corynebacteriales;family_Mycobacteriaceae;	0	0	0	0	0	0	0	0	0	0	0	0	0	1	0	0
superkingdom_Bacteria;phylum_Actinobacteria;class_Actinomycetia;order_Corynebacteriales;family_Mycobacteriaceae;genus_Mycobacterium;	2	0	0	0	0	0	0	0	0	3	4	0	0	3	0	4
superkingdom_Bacteria;phylum_Actinobacteria;class_Actinomycetia;order_Corynebacteriales;family_Mycobacteriaceae;genus_Mycolicibacter;	1	0	0	0	0	0	0	1	0	0	0	0	0	0	0	0
superkingdom_Bacteria;phylum_Actinobacteria;class_Actinomycetia;order_Corynebacteriales;family_Mycobacteriaceae;genus_Mycolicibacterium;	0	0	0	0	0	0	0	0	0	0	0	0	0	6	0	0
superkingdom_Bacteria;phylum_Actinobacteria;class_Actinomycetia;order_Corynebacteriales;family_Nocardiaceae;genus_Rhodococcus;	5	0	0	0	0	0	0	0	0	9	22	0	0	0	0	16
superkingdom_Bacteria;phylum_Actinobacteria;class_Actinomycetia;order_Corynebacteriales;family_Nocardiaceae;genus_Rhodococcus;species_Rhodococcus triatomae;	0	0	0	0	0	0	0	0	0	1	0	0	0	0	0	0
superkingdom_Bacteria;phylum_Actinobacteria;class_Actinomycetia;order_Frankiales;family_Frankiaceae;	0	0	0	0	0	0	0	0	0	0	0	0	0	0	0	0
superkingdom_Bacteria;phylum_Actinobacteria;class_Actinomycetia;order_Micrococcales;family_Dermacoccaceae;genus_Leekyejoonella;	0	0	0	0	0	0	0	0	0	0	2	0	0	0	0	0
superkingdom_Bacteria;phylum_Actinobacteria;class_Actinomycetia;order_Micrococcales;family_Microbacteriaceae;	0	0	0	9	0	0	0	0	0	0	0	0	0	0	0	0
superkingdom_Bacteria;phylum_Actinobacteria;class_Actinomycetia;order_Micrococcales;family_Microbacteriaceae;genus_Candidatus Aquiluna;	0	0	0	15	0	0	0	0	0	0	0	0	0	0	0	0
superkingdom_Bacteria;phylum_Actinobacteria;class_Actinomycetia;order_Micrococcales;family_Microbacteriaceae;genus_Chryseoglobus;	0	0	0	0	0	0	0	0	0	0	0	0	0	0	0	0
superkingdom_Bacteria;phylum_Actinobacteria;class_Actinomycetia;order_Micrococcales;family_Microbacteriaceae;genus_Lacisediminihabitans;	14	0	0	0	0	0	0	0	0	0	0	0	0	0	0	0
superkingdom_Bacteria;phylum_Actinobacteria;class_Actinomycetia;order_Micrococcales;family_Microbacteriaceae;genus_Leifsonia;	0	0	0	1	0	0	0	0	0	0	0	0	0	0	0	0
superkingdom_Bacteria;phylum_Actinobacteria;class_Actinomycetia;order_Micrococcales;family_Microbacteriaceae;genus_Lysinimonas;	0	0	0	1	0	0	0	0	0	0	0	0	0	0	0	0
superkingdom_Bacteria;phylum_Actinobacteria;class_Actinomycetia;order_Micrococcales;family_Microbacteriaceae;genus_Microbacterium;	0	0	0	0	0	0	0	0	0	1	0	0	0	0	0	0
superkingdom_Bacteria;phylum_Actinobacteria;class_Actinomycetia;order_Micrococcales;family_Microbacteriaceae;genus_Microcella;	0	0	0	9	0	0	0	0	0	15	0	0	0	0	0	0
superkingdom_Bacteria;phylum_Actinobacteria;class_Actinomycetia;order_Micrococcales;family_Microbacteriaceae;genus_Salinibacterium;	0	0	0	0	0	0	0	0	0	2	0	0	0	0	0	0
superkingdom_Bacteria;phylum_Actinobacteria;class_Actinomycetia;order_Micrococcales;family_Microbacteriaceae;genus_Yonghaparkia;	1	0	0	0	0	0	0	0	0	0	0	0	0	0	0	0
superkingdom_Bacteria;phylum_Actinobacteria;class_Actinomycetia;order_Propionibacteriales;family_Nocardioidaceae;genus_Marmoricola;	0	0	0	0	0	0	0	1	0	0	0	0	0	0	0	0
superkingdom_Bacteria;phylum_Actinobacteria;class_Actinomycetia;order_Propionibacteriales;family_Nocardioidaceae;genus_Nocardioides;	7	0	0	0	0	0	0	5	0	0	1	0	0	0	0	0
superkingdom_Bacteria;phylum_Actinobacteria;class_Actinomycetia;order_Propionibacteriales;family_Nocardioidaceae;genus_Pimelobacter;	4	0	0	0	0	0	0	0	0	0	0	0	0	0	0	0
superkingdom_Bacteria;phylum_Actinobacteria;class_Actinomycetia;order_Pseudonocardiales;family_Pseudonocardiaceae;genus_Gandjariella;	1	0	0	0	0	0	0	0	0	0	0	0	0	0	0	0
superkingdom_Bacteria;phylum_Actinobacteria;class_Actinomycetia;order_Pseudonocardiales;family_Pseudonocardiaceae;genus_Saccharopolyspora;	1	0	0	0	0	0	0	0	0	0	0	0	0	0	0	0
superkingdom_Bacteria;phylum_Actinobacteria;class_Actinomycetia;order_Streptomycetales;family_Streptomycetaceae;genus_Streptomyces;	0	0	0	0	0	0	0	0	0	0	0	0	0	0	0	0
superkingdom_Bacteria;phylum_Actinobacteria;class_Actinomycetia;order_Streptosporangiales;	0	0	0	1	0	0	0	0	0	0	0	0	0	0	0	0
superkingdom_Bacteria;phylum_Actinobacteria;class_Nitriliruptoria;order_Euzebyales;	1	0	0	0	0	0	0	0	0	0	0	0	0	0	0	0
superkingdom_Bacteria;phylum_Actinobacteria;class_Nitriliruptoria;order_Euzebyales;family_Euzebyaceae;genus_Euzebya;	6	0	0	0	0	0	0	0	0	0	0	0	0	0	0	0
superkingdom_Bacteria;phylum_Actinobacteria;class_Thermoleophilia;	0	0	0	0	0	0	0	0	0	0	0	0	0	0	0	0
superkingdom_Bacteria;phylum_Actinobacteria;class_Thermoleophilia;order_Solirubrobacterales;	0	0	0	2	0	0	0	0	0	0	0	0	0	0	0	0
superkingdom_Bacteria;phylum_Actinobacteria;class_Thermoleophilia;order_Solirubrobacterales;family_Solirubrobacteraceae;genus_Solirubrobacter;	1	0	0	0	0	0	0	0	0	0	0	0	0	0	0	0
superkingdom_Bacteria;phylum_Bacteroidetes;	0	0	0	0	0	0	0	3	24	0	0	0	0	2	0	0
superkingdom_Bacteria;phylum_Bacteroidetes;class_Bacteroidia;	0	0	0	0	0	0	0	0	0	0	0	0	0	0	0	0
superkingdom_Bacteria;phylum_Bacteroidetes;class_Chitinophagia;order_Chitinophagales;family_Chitinophagaceae;genus_Paraflavitalea;	0	0	0	0	0	0	0	0	0	0	0	0	0	1	0	0
superkingdom_Bacteria;phylum_Bacteroidetes;class_Cytophagia;order_Cytophagales;	0	0	0	0	0	0	0	0	7	0	0	0	0	0	0	0
superkingdom_Bacteria;phylum_Bacteroidetes;class_Cytophagia;order_Cytophagales;family_Cyclobacteriaceae;genus_Algoriphagus;	0	0	0	0	0	0	0	0	3	0	0	0	0	0	0	0
superkingdom_Bacteria;phylum_Bacteroidetes;class_Cytophagia;order_Cytophagales;family_Cyclobacteriaceae;genus_Aquiflexum;	0	0	0	0	0	0	0	0	0	0	0	0	0	0	0	0
superkingdom_Bacteria;phylum_Bacteroidetes;class_Cytophagia;order_Cytophagales;family_Cyclobacteriaceae;genus_Belliella;	0	0	0	0	0	0	0	0	6	0	0	0	0	0	0	0
superkingdom_Bacteria;phylum_Bacteroidetes;class_Cytophagia;order_Cytophagales;family_Cyclobacteriaceae;genus_Mongoliitalea;	0	0	0	0	0	0	0	0	1	0	0	0	0	0	0	0
superkingdom_Bacteria;phylum_Bacteroidetes;class_Cytophagia;order_Cytophagales;family_Cytophagaceae;	0	0	0	0	0	0	0	0	0	0	0	0	0	0	0	0
superkingdom_Bacteria;phylum_Bacteroidetes;class_Cytophagia;order_Cytophagales;family_Cytophagaceae;genus_Emticicia;species_Emticicia oligotrophica;	0	0	0	0	0	0	0	0	0	0	0	0	0	0	0	0
superkingdom_Bacteria;phylum_Bacteroidetes;class_Cytophagia;order_Cytophagales;family_Cytophagaceae;genus_Jiulongibacter;	0	0	0	0	0	0	0	0	0	0	0	0	0	0	0	0
superkingdom_Bacteria;phylum_Bacteroidetes;class_Cytophagia;order_Cytophagales;family_Flammeovirgaceae;	0	0	0	0	0	0	0	0	1	0	0	0	0	0	0	0
superkingdom_Bacteria;phylum_Bacteroidetes;class_Cytophagia;order_Cytophagales;family_Flexibacteraceae;genus_Flexibacter;	0	0	0	0	0	0	0	0	0	0	0	0	0	0	0	0
superkingdom_Bacteria;phylum_Bacteroidetes;class_Cytophagia;order_Cytophagales;family_Hymenobacteraceae;genus_Botryobacter;	0	0	0	0	0	0	0	0	0	0	0	0	0	0	0	0
superkingdom_Bacteria;phylum_Bacteroidetes;class_Cytophagia;order_Cytophagales;family_Microscillaceae;genus_Microscilla;	0	0	0	0	0	0	0	0	0	0	0	0	0	0	0	0
superkingdom_Bacteria;phylum_Bacteroidetes;class_Cytophagia;order_Cytophagales;family_Reichenbachiellaceae;genus_Ekhidna;	0	0	0	0	0	0	0	0	2	0	0	0	0	0	0	0
superkingdom_Bacteria;phylum_Bacteroidetes;class_Cytophagia;order_Cytophagales;family_Thermoflexibacteraceae;genus_Thermoflexibacter;	0	0	0	0	0	0	0	0	0	0	0	0	0	0	0	0
superkingdom_Bacteria;phylum_Bacteroidetes;class_Flavobacteriia;	0	0	0	0	0	0	0	0	0	0	0	0	0	0	0	0
superkingdom_Bacteria;phylum_Bacteroidetes;class_Flavobacteriia;order_Flavobacteriales;	1	0	0	0	0	0	0	3	4	0	0	0	0	5	0	0
superkingdom_Bacteria;phylum_Bacteroidetes;class_Flavobacteriia;order_Flavobacteriales;family_Crocinitomicaceae;	0	0	0	0	0	0	0	0	4	0	0	0	0	0	0	0
superkingdom_Bacteria;phylum_Bacteroidetes;class_Flavobacteriia;order_Flavobacteriales;family_Crocinitomicaceae;genus_Fluviicola;	0	0	0	0	0	0	0	0	0	0	0	0	0	0	0	0
superkingdom_Bacteria;phylum_Bacteroidetes;class_Flavobacteriia;order_Flavobacteriales;family_Cryomorphaceae;	0	0	0	0	0	0	0	0	9	0	0	0	0	0	0	0
superkingdom_Bacteria;phylum_Bacteroidetes;class_Flavobacteriia;order_Flavobacteriales;family_Flavobacteriaceae;	3	0	0	0	0	0	0	0	32	0	0	0	0	1	0	0
superkingdom_Bacteria;phylum_Bacteroidetes;class_Flavobacteriia;order_Flavobacteriales;family_Flavobacteriaceae;genus_Aquaticitalea;	0	0	0	0	0	0	0	0	9	0	0	0	0	0	0	0
superkingdom_Bacteria;phylum_Bacteroidetes;class_Flavobacteriia;order_Flavobacteriales;family_Flavobacteriaceae;genus_Aureivirga;	0	0	0	0	0	0	0	0	0	0	0	0	0	0	0	0
superkingdom_Bacteria;phylum_Bacteroidetes;class_Flavobacteriia;order_Flavobacteriales;family_Flavobacteriaceae;genus_Bizionia;	0	0	0	0	0	0	0	0	1	0	0	0	0	0	0	0
superkingdom_Bacteria;phylum_Bacteroidetes;class_Flavobacteriia;order_Flavobacteriales;family_Flavobacteriaceae;genus_Croceibacter;	0	0	0	0	0	0	0	0	7	0	0	0	0	0	0	0
superkingdom_Bacteria;phylum_Bacteroidetes;class_Flavobacteriia;order_Flavobacteriales;family_Flavobacteriaceae;genus_Dokdonia;	0	0	0	0	0	0	0	0	0	0	0	0	0	0	0	0
superkingdom_Bacteria;phylum_Bacteroidetes;class_Flavobacteriia;order_Flavobacteriales;family_Flavobacteriaceae;genus_Flagellimonas;	0	0	0	0	0	0	0	0	0	0	0	0	0	4	0	0
superkingdom_Bacteria;phylum_Bacteroidetes;class_Flavobacteriia;order_Flavobacteriales;family_Flavobacteriaceae;genus_Flavobacterium;	0	0	0	0	0	0	0	0	4	0	0	0	0	0	0	0
superkingdom_Bacteria;phylum_Bacteroidetes;class_Flavobacteriia;order_Flavobacteriales;family_Flavobacteriaceae;genus_Formosa;	0	0	0	0	0	0	0	0	0	0	0	0	0	0	0	0
superkingdom_Bacteria;phylum_Bacteroidetes;class_Flavobacteriia;order_Flavobacteriales;family_Flavobacteriaceae;genus_Joostella;	0	0	0	0	0	0	0	0	2	0	0	0	0	0	0	0
superkingdom_Bacteria;phylum_Bacteroidetes;class_Flavobacteriia;order_Flavobacteriales;family_Flavobacteriaceae;genus_Leeuwenhoekiella;	0	0	0	0	0	0	0	0	4	0	0	0	0	0	0	0
superkingdom_Bacteria;phylum_Bacteroidetes;class_Flavobacteriia;order_Flavobacteriales;family_Flavobacteriaceae;genus_Maribacter;	0	0	0	0	0	0	0	0	1	0	0	0	0	2	0	0
superkingdom_Bacteria;phylum_Bacteroidetes;class_Flavobacteriia;order_Flavobacteriales;family_Flavobacteriaceae;genus_Mesoflavibacter;	0	0	0	0	0	0	0	0	0	0	0	0	0	0	0	0
superkingdom_Bacteria;phylum_Bacteroidetes;class_Flavobacteriia;order_Flavobacteriales;family_Flavobacteriaceae;genus_Mesonia;	0	0	0	0	0	0	0	0	0	0	0	0	0	0	0	0
superkingdom_Bacteria;phylum_Bacteroidetes;class_Flavobacteriia;order_Flavobacteriales;family_Flavobacteriaceae;genus_Olleya;	0	0	0	0	0	0	0	0	0	0	0	0	0	0	0	0
superkingdom_Bacteria;phylum_Bacteroidetes;class_Flavobacteriia;order_Flavobacteriales;family_Flavobacteriaceae;genus_Polaribacter;	0	0	0	0	0	0	0	0	1	0	0	0	0	2	0	0
superkingdom_Bacteria;phylum_Bacteroidetes;class_Flavobacteriia;order_Flavobacteriales;family_Flavobacteriaceae;genus_Salegentibacter;	0	0	0	0	0	0	0	0	2	0	0	0	0	0	0	0
superkingdom_Bacteria;phylum_Bacteroidetes;class_Flavobacteriia;order_Flavobacteriales;family_Flavobacteriaceae;genus_Sediminicola;	0	0	0	0	0	0	0	0	0	0	0	0	0	1	0	0
superkingdom_Bacteria;phylum_Bacteroidetes;class_Flavobacteriia;order_Flavobacteriales;family_Flavobacteriaceae;genus_Tenacibaculum;	0	0	0	0	0	0	0	0	1	0	0	0	0	0	0	0
superkingdom_Bacteria;phylum_Bacteroidetes;class_Flavobacteriia;order_Flavobacteriales;family_Flavobacteriaceae;genus_Ulvibacter;	0	0	0	0	0	0	0	0	3	0	0	0	0	0	0	0
superkingdom_Bacteria;phylum_Bacteroidetes;class_Flavobacteriia;order_Flavobacteriales;family_Flavobacteriaceae;genus_Winogradskyella;	0	0	0	0	0	0	0	0	0	0	0	0	0	2	0	0
superkingdom_Bacteria;phylum_Bacteroidetes;class_Flavobacteriia;order_Flavobacteriales;family_Flavobacteriaceae;genus_Zunongwangia;	0	0	0	0	0	0	0	0	9	0	0	0	0	0	0	0
superkingdom_Bacteria;phylum_Bacteroidetes;class_Flavobacteriia;order_Flavobacteriales;family_Luteibaculaceae;genus_Luteibaculum;	0	0	0	0	0	0	0	0	17	0	0	0	0	0	0	0
superkingdom_Bacteria;phylum_Bacteroidetes;class_Flavobacteriia;order_Flavobacteriales;family_Vicingaceae;genus_Vicingus;	0	0	0	0	0	0	0	0	0	0	0	0	0	0	0	0
superkingdom_Bacteria;phylum_Bacteroidetes;class_Flavobacteriia;order_Flavobacteriales;family_Weeksellaceae;genus_Moheibacter;	0	0	0	0	0	0	0	0	1	0	0	0	0	0	0	0
superkingdom_Bacteria;phylum_Bacteroidetes;class_Saprospiria;order_Saprospirales;	0	0	0	0	0	0	0	0	0	0	0	0	0	0	0	0
superkingdom_Bacteria;phylum_Bacteroidetes;class_Saprospiria;order_Saprospirales;family_Lewinellaceae;	0	0	0	0	0	0	0	0	0	0	0	0	0	3	0	0
superkingdom_Bacteria;phylum_Bacteroidetes;class_Saprospiria;order_Saprospirales;family_Lewinellaceae;genus_Lewinella;	0	0	0	0	0	0	0	0	0	0	0	0	0	0	0	0
superkingdom_Bacteria;phylum_Bacteroidetes;class_Saprospiria;order_Saprospirales;family_Saprospiraceae;	0	0	0	0	0	0	0	0	0	0	0	0	0	1	0	0
superkingdom_Bacteria;phylum_Bacteroidetes;class_Sphingobacteriia;order_Sphingobacteriales;	0	0	0	0	0	0	0	0	0	0	0	0	0	0	0	0
superkingdom_Bacteria;phylum_Bacteroidetes;class_Sphingobacteriia;order_Sphingobacteriales;family_Sphingobacteriaceae;	0	0	0	0	0	0	0	0	0	0	0	0	0	0	0	0
superkingdom_Bacteria;phylum_Bacteroidetes;class_Sphingobacteriia;order_Sphingobacteriales;family_Sphingobacteriaceae;genus_Daejeonella;	0	0	0	0	0	0	0	0	0	0	0	0	0	0	0	0
superkingdom_Bacteria;phylum_Bacteroidetes;class_Sphingobacteriia;order_Sphingobacteriales;family_Sphingobacteriaceae;genus_Mucilaginibacter;	0	0	0	0	0	0	0	0	1	0	0	0	0	0	0	0
superkingdom_Bacteria;phylum_Bacteroidetes;class_Sphingobacteriia;order_Sphingobacteriales;family_Sphingobacteriaceae;genus_Pedobacter;	0	0	0	0	0	0	0	0	1	0	0	0	0	0	0	0
superkingdom_Bacteria;phylum_Balneolaeota;class_Balneolia;order_Balneolales;family_Balneolaceae;genus_Gracilimonas;	0	0	0	0	0	0	0	0	0	0	0	0	0	1	0	0
superkingdom_Bacteria;phylum_Calditrichaeota;class_Calditrichae;order_Calditrichales;family_Calditrichaceae;genus_Caldithrix;	0	0	0	0	0	0	0	0	0	0	0	0	0	1	0	0
superkingdom_Bacteria;phylum_Candidatus Binatota;class_Candidatus Binatia;order_Candidatus Binatales;family_Candidatus Binataceae;	0	0	0	0	0	0	0	0	0	2	0	0	0	0	0	0
superkingdom_Bacteria;phylum_Candidatus Dadabacteria;	0	0	0	0	0	0	0	0	2	0	0	0	0	0	0	0
superkingdom_Bacteria;phylum_Candidatus Handelsmanbacteria;	2	0	0	0	0	0	0	0	0	0	0	0	0	0	0	0
superkingdom_Bacteria;phylum_Candidatus Latescibacteria;	1	0	0	0	0	0	0	0	0	0	0	0	0	12	0	0
superkingdom_Bacteria;phylum_Candidatus Marinimicrobia;	23	0	0	0	0	0	0	0	27	0	0	0	0	0	0	0
superkingdom_Bacteria;phylum_Candidatus Omnitrophica;	0	0	0	0	0	0	0	4	0	0	0	0	0	5	0	0
superkingdom_Bacteria;phylum_Candidatus Poribacteria;	0	0	0	11	0	0	0	0	0	0	0	0	0	0	0	0
superkingdom_Bacteria;phylum_Candidatus Saccharibacteria;	0	0	0	1	0	0	0	0	0	0	0	0	0	0	0	0
superkingdom_Bacteria;phylum_Candidatus Tectomicrobia;genus_Candidatus Entotheonella;	0	0	0	0	0	0	0	0	0	3	0	0	0	0	0	0
superkingdom_Bacteria;phylum_Chloroflexi;	132	0	0	11	0	0	0	0	6	16	1	0	0	0	0	1
superkingdom_Bacteria;phylum_Chloroflexi;class_Anaerolineae;order_Anaerolineales;family_Anaerolineaceae;	0	0	0	2	0	0	0	0	0	0	0	0	0	0	0	0
superkingdom_Bacteria;phylum_Chloroflexi;class_Anaerolineae;order_Anaerolineales;family_Anaerolineaceae;genus_Anaerolinea;	2	0	0	0	0	0	0	0	0	0	0	0	0	0	0	0
superkingdom_Bacteria;phylum_Chloroflexi;class_Dehalococcoidia;	165	0	0	13	0	0	0	0	0	5	8	0	0	0	0	0
superkingdom_Bacteria;phylum_Chloroflexi;class_Dehalococcoidia;order_Dehalococcoidales;	0	0	0	351	0	0	0	0	0	0	0	0	0	0	0	0
superkingdom_Bacteria;phylum_Cyanobacteria;	0	0	0	0	0	0	0	0	0	0	0	0	0	2	0	0
superkingdom_Bacteria;phylum_Cyanobacteria;order_Chroococcales;family_Aphanothecaceae;genus_Candidatus Atelocyanobacterium;species_Candidatus Atelocyanobacterium thalassa;	0	0	0	0	0	0	0	0	0	0	0	0	0	0	0	0
superkingdom_Bacteria;phylum_Cyanobacteria;order_Chroococcales;family_Aphanothecaceae;genus_Crocosphaera;	0	0	0	0	0	0	0	0	0	0	0	0	0	2	0	0
superkingdom_Bacteria;phylum_Cyanobacteria;order_Oscillatoriales;family_Microcoleaceae;genus_Trichodesmium;	0	0	0	0	0	0	0	0	0	0	0	0	0	0	0	9
superkingdom_Bacteria;phylum_Cyanobacteria;order_Synechococcales;	0	0	0	0	0	0	0	0	0	0	0	0	0	0	0	0
superkingdom_Bacteria;phylum_Cyanobacteria;order_Synechococcales;family_Leptolyngbyaceae;genus_Leptolyngbya;	0	0	0	0	0	0	0	0	0	0	0	0	0	1	0	0
superkingdom_Bacteria;phylum_Cyanobacteria;order_Synechococcales;family_Synechococcaceae;genus_Synechococcus;	0	0	0	0	0	0	0	0	0	0	0	0	0	0	0	0
superkingdom_Bacteria;phylum_Deinococcus-Thermus;class_Deinococci;order_Trueperales;family_Trueperaceae;	2	0	0	0	0	0	0	0	0	0	0	0	0	0	0	0
superkingdom_Bacteria;phylum_Firmicutes;class_Bacilli;order_Bacillales;family_Bacillaceae;genus_Halobacillus;	0	0	0	1	0	0	0	0	0	0	0	0	0	0	0	0
superkingdom_Bacteria;phylum_Firmicutes;class_Bacilli;order_Bacillales;family_Bacillaceae;genus_Oceanobacillus;	0	0	0	1	0	0	0	0	0	0	0	0	0	0	0	2
superkingdom_Bacteria;phylum_Firmicutes;class_Bacilli;order_Bacillales;family_Bacillaceae;genus_Salipaludibacillus;	0	0	0	3	0	0	0	0	0	0	0	0	0	0	0	0
superkingdom_Bacteria;phylum_Gemmatimonadetes;	57	0	0	0	0	0	0	0	0	5	1	0	0	0	0	0
superkingdom_Bacteria;phylum_Gemmatimonadetes;class_Gemmatimonadetes;order_Gemmatimonadales;	0	0	0	0	0	0	0	0	1	0	0	0	0	0	0	0
superkingdom_Bacteria;phylum_Gemmatimonadetes;class_Gemmatimonadetes;order_Gemmatimonadales;family_Gemmatimonadaceae;genus_Gemmatimonas;	0	0	0	0	0	0	0	0	0	0	0	0	0	0	0	0
superkingdom_Bacteria;phylum_Ignavibacteriae;	0	0	0	0	0	0	0	0	16	0	0	0	0	0	0	0
superkingdom_Bacteria;phylum_Ignavibacteriae;class_Ignavibacteria;	0	0	0	0	0	0	0	0	0	0	0	0	0	0	0	0
superkingdom_Bacteria;phylum_Ignavibacteriae;class_Ignavibacteria;order_Ignavibacteriales;family_Ignavibacteriaceae;genus_Ignavibacterium;	0	0	0	0	0	0	0	0	0	0	0	0	0	1	0	0
superkingdom_Bacteria;phylum_Lentisphaerae;class_Lentisphaeria;	2	0	0	0	0	0	0	0	0	0	0	0	0	0	0	0
superkingdom_Bacteria;phylum_Nitrospinae;	0	0	0	0	0	0	0	0	12	0	1	0	0	0	0	0
superkingdom_Bacteria;phylum_Nitrospinae;class_Nitrospinia;order_Nitrospinales;family_Nitrospinaceae;	0	0	0	0	0	0	0	0	7	0	0	0	0	0	0	1
superkingdom_Bacteria;phylum_Nitrospinae;class_Nitrospinia;order_Nitrospinales;family_Nitrospinaceae;genus_Nitrospina;	0	0	0	0	0	0	0	0	17	0	0	0	0	0	0	0
superkingdom_Bacteria;phylum_Nitrospirae;class_Nitrospira;order_Nitrospirales;	0	0	0	1	0	0	0	0	0	0	0	0	0	0	0	0
superkingdom_Bacteria;phylum_Planctomycetes;	0	0	0	0	0	0	0	1	0	0	0	0	0	4	0	0
superkingdom_Bacteria;phylum_Planctomycetes;class_Phycisphaerae;	0	0	0	0	0	0	0	0	0	0	0	0	0	1	0	0
superkingdom_Bacteria;phylum_Planctomycetes;class_Phycisphaerae;order_Phycisphaerales;	0	0	0	0	0	0	0	0	0	0	0	0	0	1	0	0
superkingdom_Bacteria;phylum_Planctomycetes;class_Planctomycetia;	0	0	0	0	0	0	0	0	0	0	0	0	0	0	0	0
superkingdom_Bacteria;phylum_Planctomycetes;class_Planctomycetia;order_Pirellulales;	0	0	0	0	0	0	0	0	0	0	0	0	0	6	0	0
superkingdom_Bacteria;phylum_Planctomycetes;class_Planctomycetia;order_Pirellulales;family_Lacipirellulaceae;genus_Bythopirellula;	0	0	0	0	0	0	0	0	0	0	0	0	0	1	0	0
superkingdom_Bacteria;phylum_Planctomycetes;class_Planctomycetia;order_Pirellulales;family_Lacipirellulaceae;genus_Posidoniimonas;	0	0	0	0	0	0	0	0	0	0	0	0	0	4	0	0
superkingdom_Bacteria;phylum_Planctomycetes;class_Planctomycetia;order_Pirellulales;family_Pirellulaceae;	0	0	0	0	0	0	0	0	0	0	0	0	0	1	0	0
superkingdom_Bacteria;phylum_Planctomycetes;class_Planctomycetia;order_Pirellulales;family_Pirellulaceae;genus_Pirellula;	0	0	0	0	0	0	0	0	0	0	0	0	0	1	0	0
superkingdom_Bacteria;phylum_Planctomycetes;class_Planctomycetia;order_Pirellulales;family_Pirellulaceae;genus_Rhodopirellula;	0	0	0	0	0	0	0	0	0	0	0	0	0	0	0	0
superkingdom_Bacteria;phylum_Planctomycetes;class_Planctomycetia;order_Planctomycetales;	0	0	0	0	0	0	0	0	4	0	0	0	0	5	0	0
superkingdom_Bacteria;phylum_Planctomycetes;class_Planctomycetia;order_Planctomycetales;family_Planctomycetaceae;	1	0	0	0	0	0	0	0	0	0	0	0	0	1	0	0
superkingdom_Bacteria;phylum_Planctomycetes;class_Planctomycetia;order_Planctomycetales;family_Planctomycetaceae;genus_Planctomyces;	0	0	0	0	0	0	0	0	0	0	1	0	0	0	0	0
superkingdom_Bacteria;phylum_Planctomycetes;class_Planctomycetia;order_Planctomycetales;family_Planctomycetaceae;genus_Schlesneria;	0	0	0	0	0	0	0	0	0	0	0	0	0	1	0	0
superkingdom_Bacteria;phylum_Planctomycetes;class_Planctomycetia;order_Planctomycetales;family_Planctomycetaceae;genus_Thalassoglobus;	0	0	0	0	0	0	0	0	0	0	0	0	0	0	0	0
superkingdom_Bacteria;phylum_Proteobacteria;	33	2	0	25	0	0	0	0	42	8	15	1	0	0	0	1
superkingdom_Bacteria;phylum_Proteobacteria;class_Acidithiobacillia;order_Acidithiobacillales;family_Acidithiobacillaceae;genus_Acidithiobacillus;	0	0	0	5	0	0	0	0	0	0	1	0	0	0	0	0
superkingdom_Bacteria;phylum_Proteobacteria;class_Alphaproteobacteria;	172	0	5	145	0	0	0	6	132	33	146	0	18	23	0	55
superkingdom_Bacteria;phylum_Proteobacteria;class_Alphaproteobacteria;genus_Candidatus Puniceispirillum;	0	0	0	0	0	0	0	0	20	0	6	0	0	0	0	0
superkingdom_Bacteria;phylum_Proteobacteria;class_Alphaproteobacteria;genus_Micavibrio;	0	0	0	0	0	0	0	1	0	0	0	0	0	0	0	0
superkingdom_Bacteria;phylum_Proteobacteria;class_Alphaproteobacteria;order_Caulobacterales;family_Caulobacteraceae;	0	0	0	0	0	0	0	9	0	0	0	0	0	0	0	0
superkingdom_Bacteria;phylum_Proteobacteria;class_Alphaproteobacteria;order_Caulobacterales;family_Caulobacteraceae;genus_Brevundimonas;	0	0	0	0	0	0	0	31	0	0	0	0	0	0	0	0
superkingdom_Bacteria;phylum_Proteobacteria;class_Alphaproteobacteria;order_Caulobacterales;family_Caulobacteraceae;genus_Phenylobacterium;	0	0	0	0	0	0	0	10	0	0	0	0	0	0	0	0
superkingdom_Bacteria;phylum_Proteobacteria;class_Alphaproteobacteria;order_Emcibacterales;family_Emcibacteraceae;	0	0	0	0	0	0	0	0	0	0	0	0	0	1	0	0
superkingdom_Bacteria;phylum_Proteobacteria;class_Alphaproteobacteria;order_Emcibacterales;family_Emcibacteraceae;genus_Emcibacter;	1	0	0	0	0	0	0	0	0	0	4	0	0	0	0	0
superkingdom_Bacteria;phylum_Proteobacteria;class_Alphaproteobacteria;order_Emcibacterales;family_Emcibacteraceae;genus_Luteithermobacter;	2	0	0	0	0	0	0	0	0	0	0	0	0	0	0	0
superkingdom_Bacteria;phylum_Proteobacteria;class_Alphaproteobacteria;order_Hyphomonadales;family_Hyphomonadaceae;	1	0	0	0	0	0	0	0	0	0	0	0	0	0	0	0
superkingdom_Bacteria;phylum_Proteobacteria;class_Alphaproteobacteria;order_Hyphomonadales;family_Hyphomonadaceae;genus_Henriciella;	0	0	0	0	0	0	0	0	0	0	0	0	0	1	0	0
superkingdom_Bacteria;phylum_Proteobacteria;class_Alphaproteobacteria;order_Hyphomonadales;family_Hyphomonadaceae;genus_Hyphomonas;	0	0	0	0	0	0	0	0	0	0	0	0	0	1	0	0
superkingdom_Bacteria;phylum_Proteobacteria;class_Alphaproteobacteria;order_Kiloniellales;family_Kiloniellaceae;genus_Kiloniella;	0	0	0	0	0	0	0	0	1	0	1	0	0	0	0	0
superkingdom_Bacteria;phylum_Proteobacteria;class_Alphaproteobacteria;order_Maricaulales;family_Maricaulaceae;genus_Hyphobacterium;	0	0	0	0	0	0	0	0	0	0	0	0	0	5	0	0
superkingdom_Bacteria;phylum_Proteobacteria;class_Alphaproteobacteria;order_Minwuiales;family_Minwuiaceae;genus_Minwuia;	1	0	0	0	0	0	0	0	0	0	0	0	1	0	0	0
superkingdom_Bacteria;phylum_Proteobacteria;class_Alphaproteobacteria;order_Parvularculales;family_Parvularculaceae;genus_Amphiplicatus;	0	0	0	0	0	0	0	0	0	0	0	0	0	20	0	0
superkingdom_Bacteria;phylum_Proteobacteria;class_Alphaproteobacteria;order_Parvularculales;family_Parvularculaceae;genus_Marinicaulis;	9	0	0	0	0	0	0	7	0	0	0	0	0	0	0	0
superkingdom_Bacteria;phylum_Proteobacteria;class_Alphaproteobacteria;order_Parvularculales;family_Parvularculaceae;genus_Parvularcula;	0	0	0	0	0	0	0	10	0	0	0	0	0	1	0	0
superkingdom_Bacteria;phylum_Proteobacteria;class_Alphaproteobacteria;order_Pelagibacterales;	24	105	0	14	8	0	0	0	611	0	6	0	31	0	0	32
superkingdom_Bacteria;phylum_Proteobacteria;class_Alphaproteobacteria;order_Pelagibacterales;family_Pelagibacteraceae;	1	45	0	53	46	0	0	0	275	0	6	0	0	0	0	51
superkingdom_Bacteria;phylum_Proteobacteria;class_Alphaproteobacteria;order_Pelagibacterales;family_Pelagibacteraceae;genus_Candidatus Pelagibacter;	8	1158	0	229	73	0	0	0	1606	0	0	0	0	0	0	566
superkingdom_Bacteria;phylum_Proteobacteria;class_Alphaproteobacteria;order_Pelagibacterales;family_Pelagibacteraceae;genus_Candidatus Pelagibacter;species_Candidatus Pelagibacter ubique;	0	68	0	0	0	0	0	0	0	0	0	0	0	0	0	0
superkingdom_Bacteria;phylum_Proteobacteria;class_Alphaproteobacteria;order_Rhizobiales;	26	0	0	1	0	0	0	0	6	0	17	0	0	0	0	1
superkingdom_Bacteria;phylum_Proteobacteria;class_Alphaproteobacteria;order_Rhizobiales;family_Aurantimonadaceae;genus_Aurantimonas;	3	0	0	0	0	0	0	0	0	0	0	0	0	0	0	0
superkingdom_Bacteria;phylum_Proteobacteria;class_Alphaproteobacteria;order_Rhizobiales;family_Bradyrhizobiaceae;	0	0	0	0	0	0	0	0	0	1	0	0	0	0	0	0
superkingdom_Bacteria;phylum_Proteobacteria;class_Alphaproteobacteria;order_Rhizobiales;family_Bradyrhizobiaceae;genus_Afipia;	13	0	0	0	0	0	0	0	0	0	0	0	0	0	0	0
superkingdom_Bacteria;phylum_Proteobacteria;class_Alphaproteobacteria;order_Rhizobiales;family_Bradyrhizobiaceae;genus_Bosea;	0	0	0	0	0	0	0	0	0	0	0	0	0	1	0	0
superkingdom_Bacteria;phylum_Proteobacteria;class_Alphaproteobacteria;order_Rhizobiales;family_Bradyrhizobiaceae;genus_Bradyrhizobium;	10	0	0	3	0	0	0	0	0	6	0	0	0	3	0	0
superkingdom_Bacteria;phylum_Proteobacteria;class_Alphaproteobacteria;order_Rhizobiales;family_Bradyrhizobiaceae;genus_Rhodopseudomonas;	0	0	0	0	0	0	0	11	0	0	0	0	0	0	0	0
superkingdom_Bacteria;phylum_Proteobacteria;class_Alphaproteobacteria;order_Rhizobiales;family_Chelatococcaceae;genus_Chelatococcus;	0	0	0	0	0	0	0	0	0	3	0	0	0	0	0	0
superkingdom_Bacteria;phylum_Proteobacteria;class_Alphaproteobacteria;order_Rhizobiales;family_Hyphomicrobiaceae;genus_Devosia;	0	0	0	0	0	0	0	1	0	0	0	0	0	0	0	0
superkingdom_Bacteria;phylum_Proteobacteria;class_Alphaproteobacteria;order_Rhizobiales;family_Hyphomicrobiaceae;genus_Dichotomicrobium;	0	0	0	0	0	0	0	0	1	0	0	0	0	0	0	0
superkingdom_Bacteria;phylum_Proteobacteria;class_Alphaproteobacteria;order_Rhizobiales;family_Hyphomicrobiaceae;genus_Hyphomicrobium;	0	0	0	0	0	0	0	0	0	0	1	0	0	2	0	0
superkingdom_Bacteria;phylum_Proteobacteria;class_Alphaproteobacteria;order_Rhizobiales;family_Hyphomicrobiaceae;genus_Rhodoplanes;	0	0	0	0	0	0	0	0	0	0	0	0	0	2	0	0
superkingdom_Bacteria;phylum_Proteobacteria;class_Alphaproteobacteria;order_Rhizobiales;family_Methylobacteriaceae;genus_Enterovirga;	4	0	0	0	0	0	0	0	0	0	0	0	0	0	0	0
superkingdom_Bacteria;phylum_Proteobacteria;class_Alphaproteobacteria;order_Rhizobiales;family_Parvibaculaceae;genus_Anderseniella;	0	0	0	1	0	0	0	0	0	0	0	0	0	0	0	0
superkingdom_Bacteria;phylum_Proteobacteria;class_Alphaproteobacteria;order_Rhizobiales;family_Parvibaculaceae;genus_Parvibaculum;	0	0	0	0	0	0	0	0	0	2	0	0	0	0	0	0
superkingdom_Bacteria;phylum_Proteobacteria;class_Alphaproteobacteria;order_Rhizobiales;family_Parvibaculaceae;genus_Rhodoligotrophos;	0	0	0	1	0	0	0	0	0	0	0	0	0	0	0	0
superkingdom_Bacteria;phylum_Proteobacteria;class_Alphaproteobacteria;order_Rhizobiales;family_Phyllobacteriaceae;	0	0	0	11	0	0	0	0	1	0	0	0	0	0	0	0
superkingdom_Bacteria;phylum_Proteobacteria;class_Alphaproteobacteria;order_Rhizobiales;family_Phyllobacteriaceae;genus_Chelativorans;	0	0	0	1	0	0	0	0	0	0	0	0	0	0	0	0
superkingdom_Bacteria;phylum_Proteobacteria;class_Alphaproteobacteria;order_Rhizobiales;family_Phyllobacteriaceae;genus_Hoeflea;	41	0	0	12	0	0	0	2	18	0	0	0	6	39	0	0
superkingdom_Bacteria;phylum_Proteobacteria;class_Alphaproteobacteria;order_Rhizobiales;family_Phyllobacteriaceae;genus_Mesorhizobium;	4	0	0	31	2	0	0	0	0	0	0	0	0	0	0	18
superkingdom_Bacteria;phylum_Proteobacteria;class_Alphaproteobacteria;order_Rhizobiales;family_Phyllobacteriaceae;genus_Nitratireductor;	2	0	0	7	0	0	0	0	0	0	0	0	0	0	0	0
superkingdom_Bacteria;phylum_Proteobacteria;class_Alphaproteobacteria;order_Rhizobiales;family_Phyllobacteriaceae;genus_Pseudaminobacter;	0	0	0	0	0	0	0	0	0	0	0	0	0	0	0	1
superkingdom_Bacteria;phylum_Proteobacteria;class_Alphaproteobacteria;order_Rhizobiales;family_Phyllobacteriaceae;genus_Zhengella;	0	0	0	3	0	0	0	0	0	0	0	0	0	0	0	0
superkingdom_Bacteria;phylum_Proteobacteria;class_Alphaproteobacteria;order_Rhizobiales;family_Rhizobiaceae;	0	0	0	1	0	0	0	0	10	0	3	0	0	0	0	0
superkingdom_Bacteria;phylum_Proteobacteria;class_Alphaproteobacteria;order_Rhizobiales;family_Rhizobiaceae;genus_Agrobacterium;	31	0	0	0	0	0	0	0	0	0	0	0	0	0	0	0
superkingdom_Bacteria;phylum_Proteobacteria;class_Alphaproteobacteria;order_Rhizobiales;family_Rhizobiaceae;genus_Rhizobium;	20	0	0	0	0	0	0	0	0	15	0	0	0	0	0	0
superkingdom_Bacteria;phylum_Proteobacteria;class_Alphaproteobacteria;order_Rhizobiales;family_Rhizobiaceae;genus_Sinorhizobium;	2	0	0	0	0	0	0	0	0	0	0	0	0	0	0	0
superkingdom_Bacteria;phylum_Proteobacteria;class_Alphaproteobacteria;order_Rhizobiales;family_Rhodobiaceae;genus_Rhodobium;	0	0	0	0	0	0	0	0	0	0	1	0	0	0	0	0
superkingdom_Bacteria;phylum_Proteobacteria;class_Alphaproteobacteria;order_Rhizobiales;family_Rhodobiaceae;genus_Tepidamorphus;	0	0	0	0	0	0	0	0	0	0	0	0	0	0	0	0
superkingdom_Bacteria;phylum_Proteobacteria;class_Alphaproteobacteria;order_Rhizobiales;family_Salinarimonadaceae;	1	0	0	0	0	0	0	0	0	0	0	0	0	0	0	0
superkingdom_Bacteria;phylum_Proteobacteria;class_Alphaproteobacteria;order_Rhizobiales;family_Xanthobacteraceae;genus_Pseudolabrys;	0	0	0	0	0	0	0	1	0	0	0	0	0	0	0	0
superkingdom_Bacteria;phylum_Proteobacteria;class_Alphaproteobacteria;order_Rhizobiales;genus_Methyloceanibacter;	0	0	0	0	0	0	0	0	0	0	0	0	0	3	0	0
superkingdom_Bacteria;phylum_Proteobacteria;class_Alphaproteobacteria;order_Rhizobiales;genus_Pseudorhodoplanes;	5	0	0	2	0	0	0	0	0	1	0	0	0	0	0	0
superkingdom_Bacteria;phylum_Proteobacteria;class_Alphaproteobacteria;order_Rhodobacterales;	33	0	0	9	0	76	0	3	33	0	6	0	0	0	0	8
superkingdom_Bacteria;phylum_Proteobacteria;class_Alphaproteobacteria;order_Rhodobacterales;family_Rhodobacteraceae;	104	10	5	154	39	24	0	4	325	0	265	0	0	0	0	75
superkingdom_Bacteria;phylum_Proteobacteria;class_Alphaproteobacteria;order_Rhodobacterales;family_Rhodobacteraceae;genus_Acidimangrovimonas;	0	0	0	0	0	0	0	0	0	0	0	0	1	0	0	0
superkingdom_Bacteria;phylum_Proteobacteria;class_Alphaproteobacteria;order_Rhodobacterales;family_Rhodobacteraceae;genus_Aestuariivita;	0	0	0	5	0	0	0	0	6	0	6	0	0	0	0	0
superkingdom_Bacteria;phylum_Proteobacteria;class_Alphaproteobacteria;order_Rhodobacterales;family_Rhodobacteraceae;genus_Ahrensia;	0	0	0	0	0	0	0	7	0	0	0	0	0	0	0	0
superkingdom_Bacteria;phylum_Proteobacteria;class_Alphaproteobacteria;order_Rhodobacterales;family_Rhodobacteraceae;genus_Albidovulum;	0	0	0	0	0	0	0	0	5	0	0	0	0	0	0	0
superkingdom_Bacteria;phylum_Proteobacteria;class_Alphaproteobacteria;order_Rhodobacterales;family_Rhodobacteraceae;genus_Aliishimia;	16	0	0	1	0	0	0	0	0	0	0	0	0	0	0	0
superkingdom_Bacteria;phylum_Proteobacteria;class_Alphaproteobacteria;order_Rhodobacterales;family_Rhodobacteraceae;genus_Amylibacter;	3	0	0	42	0	0	0	1	0	0	0	0	0	0	0	0
superkingdom_Bacteria;phylum_Proteobacteria;class_Alphaproteobacteria;order_Rhodobacterales;family_Rhodobacteraceae;genus_Antarctobacter;	0	0	0	4	0	0	0	0	0	0	0	0	0	0	0	0
superkingdom_Bacteria;phylum_Proteobacteria;class_Alphaproteobacteria;order_Rhodobacterales;family_Rhodobacteraceae;genus_Aquicoccus;	0	0	0	1	0	0	0	0	0	0	0	0	0	0	0	0
superkingdom_Bacteria;phylum_Proteobacteria;class_Alphaproteobacteria;order_Rhodobacterales;family_Rhodobacteraceae;genus_Ascidiaceihabitans;	0	0	0	0	0	0	0	0	0	0	1	0	0	0	0	1
superkingdom_Bacteria;phylum_Proteobacteria;class_Alphaproteobacteria;order_Rhodobacterales;family_Rhodobacteraceae;genus_Boseongicola;	0	0	0	5	0	0	0	0	1	0	0	0	0	0	0	0
superkingdom_Bacteria;phylum_Proteobacteria;class_Alphaproteobacteria;order_Rhodobacterales;family_Rhodobacteraceae;genus_Celeribacter;	0	0	0	0	0	0	0	0	0	0	2	0	0	0	0	5
superkingdom_Bacteria;phylum_Proteobacteria;class_Alphaproteobacteria;order_Rhodobacterales;family_Rhodobacteraceae;genus_Cereibacter;	1	0	0	0	0	0	0	0	0	0	0	0	0	0	0	0
superkingdom_Bacteria;phylum_Proteobacteria;class_Alphaproteobacteria;order_Rhodobacterales;family_Rhodobacteraceae;genus_Citreicella;	0	0	0	0	0	0	0	1	0	0	0	0	0	0	0	0
superkingdom_Bacteria;phylum_Proteobacteria;class_Alphaproteobacteria;order_Rhodobacterales;family_Rhodobacteraceae;genus_Cognatiyoonia;	0	0	0	1	0	0	0	0	0	0	0	0	0	0	0	0
superkingdom_Bacteria;phylum_Proteobacteria;class_Alphaproteobacteria;order_Rhodobacterales;family_Rhodobacteraceae;genus_Cribrihabitans;	0	0	0	1	0	0	0	0	0	0	0	0	0	0	0	0
superkingdom_Bacteria;phylum_Proteobacteria;class_Alphaproteobacteria;order_Rhodobacterales;family_Rhodobacteraceae;genus_Defluviimonas;	1	0	0	0	0	0	0	0	6	0	0	0	0	0	0	0
superkingdom_Bacteria;phylum_Proteobacteria;class_Alphaproteobacteria;order_Rhodobacterales;family_Rhodobacteraceae;genus_Dinoroseobacter;	0	0	0	0	0	0	0	0	1	0	0	0	0	0	0	0
superkingdom_Bacteria;phylum_Proteobacteria;class_Alphaproteobacteria;order_Rhodobacterales;family_Rhodobacteraceae;genus_Donghicola;	0	0	0	0	0	0	0	0	1	0	0	0	0	0	0	0
superkingdom_Bacteria;phylum_Proteobacteria;class_Alphaproteobacteria;order_Rhodobacterales;family_Rhodobacteraceae;genus_Fertoebacter;	0	0	0	0	0	0	0	0	0	0	0	0	0	0	0	0
superkingdom_Bacteria;phylum_Proteobacteria;class_Alphaproteobacteria;order_Rhodobacterales;family_Rhodobacteraceae;genus_Flavimaricola;	1	0	0	14	0	0	0	0	0	0	0	0	0	0	0	0
superkingdom_Bacteria;phylum_Proteobacteria;class_Alphaproteobacteria;order_Rhodobacterales;family_Rhodobacteraceae;genus_Gemmobacter;	0	0	0	1	0	0	0	0	2	0	0	0	0	0	0	0
superkingdom_Bacteria;phylum_Proteobacteria;class_Alphaproteobacteria;order_Rhodobacterales;family_Rhodobacteraceae;genus_Halocynthiibacter;	0	0	0	0	0	0	0	0	1	0	0	0	0	0	0	0
superkingdom_Bacteria;phylum_Proteobacteria;class_Alphaproteobacteria;order_Rhodobacterales;family_Rhodobacteraceae;genus_Hwanghaeicola;	2	0	0	0	0	0	0	0	0	0	0	0	0	0	0	0
superkingdom_Bacteria;phylum_Proteobacteria;class_Alphaproteobacteria;order_Rhodobacterales;family_Rhodobacteraceae;genus_Jannaschia;	0	0	0	0	0	0	0	0	13	0	0	0	0	0	0	0
superkingdom_Bacteria;phylum_Proteobacteria;class_Alphaproteobacteria;order_Rhodobacterales;family_Rhodobacteraceae;genus_Jhaorihella;	0	0	0	1	0	0	0	0	0	0	0	0	0	0	0	0
superkingdom_Bacteria;phylum_Proteobacteria;class_Alphaproteobacteria;order_Rhodobacterales;family_Rhodobacteraceae;genus_Labrenzia;	0	0	10	0	0	0	0	0	0	0	0	0	0	0	0	0
superkingdom_Bacteria;phylum_Proteobacteria;class_Alphaproteobacteria;order_Rhodobacterales;family_Rhodobacteraceae;genus_Leisingera;	0	0	0	1	2	0	0	0	7	0	2	0	0	0	0	0
superkingdom_Bacteria;phylum_Proteobacteria;class_Alphaproteobacteria;order_Rhodobacterales;family_Rhodobacteraceae;genus_Lentibacter;	0	0	0	0	20	0	0	0	0	0	0	0	0	0	0	0
superkingdom_Bacteria;phylum_Proteobacteria;class_Alphaproteobacteria;order_Rhodobacterales;family_Rhodobacteraceae;genus_Limibaculum;	0	0	0	0	0	0	0	0	36	0	1	0	0	0	0	0
superkingdom_Bacteria;phylum_Proteobacteria;class_Alphaproteobacteria;order_Rhodobacterales;family_Rhodobacteraceae;genus_Limimaricola;	22	0	0	0	0	0	0	0	0	0	0	0	0	0	0	0
superkingdom_Bacteria;phylum_Proteobacteria;class_Alphaproteobacteria;order_Rhodobacterales;family_Rhodobacteraceae;genus_Limimaricola;species_Limimaricola cinnabarinus;	0	0	0	0	0	0	0	0	0	0	0	0	0	0	0	0
superkingdom_Bacteria;phylum_Proteobacteria;class_Alphaproteobacteria;order_Rhodobacterales;family_Rhodobacteraceae;genus_Litoreibacter;	0	0	0	0	0	0	0	0	0	0	1	0	0	0	0	0
superkingdom_Bacteria;phylum_Proteobacteria;class_Alphaproteobacteria;order_Rhodobacterales;family_Rhodobacteraceae;genus_Litorimicrobium;	1	0	0	0	0	0	0	0	0	0	0	0	0	0	0	0
superkingdom_Bacteria;phylum_Proteobacteria;class_Alphaproteobacteria;order_Rhodobacterales;family_Rhodobacteraceae;genus_Loktanella;	7	0	0	1	0	0	0	0	22	0	1	0	0	0	0	8
superkingdom_Bacteria;phylum_Proteobacteria;class_Alphaproteobacteria;order_Rhodobacterales;family_Rhodobacteraceae;genus_Lutimaribacter;	0	0	0	1	0	0	0	0	0	0	0	0	0	0	0	0
superkingdom_Bacteria;phylum_Proteobacteria;class_Alphaproteobacteria;order_Rhodobacterales;family_Rhodobacteraceae;genus_Marimonas;	0	0	0	0	1	0	0	0	0	0	0	0	0	0	0	0
superkingdom_Bacteria;phylum_Proteobacteria;class_Alphaproteobacteria;order_Rhodobacterales;family_Rhodobacteraceae;genus_Marinovum;	4	0	0	8	0	0	0	0	44	0	1	0	0	0	0	3
superkingdom_Bacteria;phylum_Proteobacteria;class_Alphaproteobacteria;order_Rhodobacterales;family_Rhodobacteraceae;genus_Maritimibacter;	0	0	0	0	0	0	0	0	0	0	0	0	0	0	0	1
superkingdom_Bacteria;phylum_Proteobacteria;class_Alphaproteobacteria;order_Rhodobacterales;family_Rhodobacteraceae;genus_Marivita;	0	0	0	0	0	0	0	0	2	0	0	0	0	0	0	0
superkingdom_Bacteria;phylum_Proteobacteria;class_Alphaproteobacteria;order_Rhodobacterales;family_Rhodobacteraceae;genus_Marivivens;	0	0	0	0	0	0	0	0	2	0	0	0	0	0	0	0
superkingdom_Bacteria;phylum_Proteobacteria;class_Alphaproteobacteria;order_Rhodobacterales;family_Rhodobacteraceae;genus_Neptunicoccus;	0	0	0	0	0	0	0	0	0	0	0	0	0	1	0	0
superkingdom_Bacteria;phylum_Proteobacteria;class_Alphaproteobacteria;order_Rhodobacterales;family_Rhodobacteraceae;genus_Nereida;	0	0	0	0	0	0	0	0	1	0	0	0	0	0	0	0
superkingdom_Bacteria;phylum_Proteobacteria;class_Alphaproteobacteria;order_Rhodobacterales;family_Rhodobacteraceae;genus_Nioella;	22	0	0	0	0	0	0	0	12	0	0	0	0	0	0	0
superkingdom_Bacteria;phylum_Proteobacteria;class_Alphaproteobacteria;order_Rhodobacterales;family_Rhodobacteraceae;genus_Oceanicella;	0	0	0	0	0	0	0	0	0	0	1	0	1	0	0	0
superkingdom_Bacteria;phylum_Proteobacteria;class_Alphaproteobacteria;order_Rhodobacterales;family_Rhodobacteraceae;genus_Oceanicola;	1	0	0	0	0	0	0	0	0	0	0	0	0	0	0	0
superkingdom_Bacteria;phylum_Proteobacteria;class_Alphaproteobacteria;order_Rhodobacterales;family_Rhodobacteraceae;genus_Octadecabacter;	0	0	0	27	2	0	0	0	43	0	1	0	0	0	0	7
superkingdom_Bacteria;phylum_Proteobacteria;class_Alphaproteobacteria;order_Rhodobacterales;family_Rhodobacteraceae;genus_Pacificibacter;	0	0	0	0	0	0	0	0	0	0	8	0	0	0	0	0
superkingdom_Bacteria;phylum_Proteobacteria;class_Alphaproteobacteria;order_Rhodobacterales;family_Rhodobacteraceae;genus_Paracoccus;	2	0	0	0	0	0	0	0	0	1	0	0	0	0	0	1
superkingdom_Bacteria;phylum_Proteobacteria;class_Alphaproteobacteria;order_Rhodobacterales;family_Rhodobacteraceae;genus_Pararhodobacter;	0	0	0	7	0	0	0	0	0	0	0	0	0	0	0	0
superkingdom_Bacteria;phylum_Proteobacteria;class_Alphaproteobacteria;order_Rhodobacterales;family_Rhodobacteraceae;genus_Parasedimentitalea;	0	0	0	6	0	0	0	0	0	0	0	0	0	0	0	0
superkingdom_Bacteria;phylum_Proteobacteria;class_Alphaproteobacteria;order_Rhodobacterales;family_Rhodobacteraceae;genus_Phaeobacter;	0	0	0	1	0	1	0	0	12	0	0	0	0	1	0	0
superkingdom_Bacteria;phylum_Proteobacteria;class_Alphaproteobacteria;order_Rhodobacterales;family_Rhodobacteraceae;genus_Planktomarina;	16	0	0	166	0	0	0	0	84	0	12	0	0	0	0	0
superkingdom_Bacteria;phylum_Proteobacteria;class_Alphaproteobacteria;order_Rhodobacterales;family_Rhodobacteraceae;genus_Planktomarina;species_Planktomarina temperata;	0	0	0	2	0	0	0	0	0	0	0	0	0	0	0	0
superkingdom_Bacteria;phylum_Proteobacteria;class_Alphaproteobacteria;order_Rhodobacterales;family_Rhodobacteraceae;genus_Planktotalea;	1	0	0	8	0	3	0	0	33	0	37	0	0	0	0	0
superkingdom_Bacteria;phylum_Proteobacteria;class_Alphaproteobacteria;order_Rhodobacterales;family_Rhodobacteraceae;genus_Poseidonocella;	6	0	0	0	0	0	0	0	0	0	0	0	0	0	0	0
superkingdom_Bacteria;phylum_Proteobacteria;class_Alphaproteobacteria;order_Rhodobacterales;family_Rhodobacteraceae;genus_Primorskyibacter;	0	0	0	0	0	0	0	0	0	0	3	0	0	0	0	0
superkingdom_Bacteria;phylum_Proteobacteria;class_Alphaproteobacteria;order_Rhodobacterales;family_Rhodobacteraceae;genus_Pseudaestuariivita;	0	0	0	0	0	0	0	0	4	0	0	0	0	0	0	0
superkingdom_Bacteria;phylum_Proteobacteria;class_Alphaproteobacteria;order_Rhodobacterales;family_Rhodobacteraceae;genus_Pseudogemmobacter;	0	0	0	0	0	0	0	1	0	0	0	0	0	0	0	0
superkingdom_Bacteria;phylum_Proteobacteria;class_Alphaproteobacteria;order_Rhodobacterales;family_Rhodobacteraceae;genus_Pseudohalocynthiibacter;	1	0	0	0	0	0	0	0	0	0	0	0	0	0	0	0
superkingdom_Bacteria;phylum_Proteobacteria;class_Alphaproteobacteria;order_Rhodobacterales;family_Rhodobacteraceae;genus_Pseudooceanicola;	19	0	0	0	0	0	0	0	0	0	2	0	0	0	0	0
superkingdom_Bacteria;phylum_Proteobacteria;class_Alphaproteobacteria;order_Rhodobacterales;family_Rhodobacteraceae;genus_Pseudophaeobacter;	1	0	0	0	15	0	0	0	0	0	0	0	0	0	0	0
superkingdom_Bacteria;phylum_Proteobacteria;class_Alphaproteobacteria;order_Rhodobacterales;family_Rhodobacteraceae;genus_Pseudorhodobacter;	0	0	0	0	0	5	0	0	2	0	0	0	0	0	0	0
superkingdom_Bacteria;phylum_Proteobacteria;class_Alphaproteobacteria;order_Rhodobacterales;family_Rhodobacteraceae;genus_Pseudoruegeria;	0	0	1	3	0	0	0	0	0	0	0	0	0	0	0	0
superkingdom_Bacteria;phylum_Proteobacteria;class_Alphaproteobacteria;order_Rhodobacterales;family_Rhodobacteraceae;genus_Rhodobacter;	1	0	0	6	0	0	0	3	0	0	0	0	0	0	0	0
superkingdom_Bacteria;phylum_Proteobacteria;class_Alphaproteobacteria;order_Rhodobacterales;family_Rhodobacteraceae;genus_Rhodophyticola;	0	0	0	1	0	0	0	0	0	0	0	0	0	0	0	0
superkingdom_Bacteria;phylum_Proteobacteria;class_Alphaproteobacteria;order_Rhodobacterales;family_Rhodobacteraceae;genus_Rhodosalinus;	0	0	0	0	0	3	0	0	0	0	0	0	0	0	0	0
superkingdom_Bacteria;phylum_Proteobacteria;class_Alphaproteobacteria;order_Rhodobacterales;family_Rhodobacteraceae;genus_Rhodovulum;	0	0	0	0	0	0	0	0	2	0	0	0	0	0	0	0
superkingdom_Bacteria;phylum_Proteobacteria;class_Alphaproteobacteria;order_Rhodobacterales;family_Rhodobacteraceae;genus_Roseibium;	0	0	0	0	1	0	0	0	1	0	0	0	0	0	0	0
superkingdom_Bacteria;phylum_Proteobacteria;class_Alphaproteobacteria;order_Rhodobacterales;family_Rhodobacteraceae;genus_Roseicitreum;	0	0	0	2	0	0	0	0	0	0	0	0	0	0	0	0
superkingdom_Bacteria;phylum_Proteobacteria;class_Alphaproteobacteria;order_Rhodobacterales;family_Rhodobacteraceae;genus_Roseicyclus;	1	0	0	0	0	0	0	0	0	0	0	0	0	0	0	0
superkingdom_Bacteria;phylum_Proteobacteria;class_Alphaproteobacteria;order_Rhodobacterales;family_Rhodobacteraceae;genus_Roseinatronobacter;	0	0	0	0	0	0	0	0	4	0	0	0	0	0	0	0
superkingdom_Bacteria;phylum_Proteobacteria;class_Alphaproteobacteria;order_Rhodobacterales;family_Rhodobacteraceae;genus_Roseisalinus;	1	0	0	0	0	0	0	0	0	0	0	0	0	0	0	0
superkingdom_Bacteria;phylum_Proteobacteria;class_Alphaproteobacteria;order_Rhodobacterales;family_Rhodobacteraceae;genus_Roseivivax;	0	0	0	0	0	0	0	0	4	0	0	0	0	0	0	0
superkingdom_Bacteria;phylum_Proteobacteria;class_Alphaproteobacteria;order_Rhodobacterales;family_Rhodobacteraceae;genus_Roseobacter;	6	0	4	18	17	3	0	0	11	0	3	0	0	0	0	8
superkingdom_Bacteria;phylum_Proteobacteria;class_Alphaproteobacteria;order_Rhodobacterales;family_Rhodobacteraceae;genus_Roseovarius;	7	0	0	50	0	0	0	3	28	0	3	0	0	0	0	8
superkingdom_Bacteria;phylum_Proteobacteria;class_Alphaproteobacteria;order_Rhodobacterales;family_Rhodobacteraceae;genus_Ruegeria;	2	0	0	31	3	0	0	0	17	0	5	0	0	0	0	0
superkingdom_Bacteria;phylum_Proteobacteria;class_Alphaproteobacteria;order_Rhodobacterales;family_Rhodobacteraceae;genus_Ruegeria;species_Ruegeria mediterranea;	0	0	0	0	0	0	0	0	1	0	0	0	0	0	0	0
superkingdom_Bacteria;phylum_Proteobacteria;class_Alphaproteobacteria;order_Rhodobacterales;family_Rhodobacteraceae;genus_Ruegeria;species_Ruegeria pomeroyi;	0	0	0	0	0	0	0	0	0	0	3	0	0	0	0	0
superkingdom_Bacteria;phylum_Proteobacteria;class_Alphaproteobacteria;order_Rhodobacterales;family_Rhodobacteraceae;genus_Sagittula;	4	0	0	0	0	0	0	0	0	0	0	0	0	0	0	0
superkingdom_Bacteria;phylum_Proteobacteria;class_Alphaproteobacteria;order_Rhodobacterales;family_Rhodobacteraceae;genus_Salinihabitans;	0	0	0	0	0	0	0	0	0	0	0	0	0	0	0	0
superkingdom_Bacteria;phylum_Proteobacteria;class_Alphaproteobacteria;order_Rhodobacterales;family_Rhodobacteraceae;genus_Salipiger;	3	0	0	0	0	0	0	12	0	0	0	0	0	0	0	0
superkingdom_Bacteria;phylum_Proteobacteria;class_Alphaproteobacteria;order_Rhodobacterales;family_Rhodobacteraceae;genus_Sedimentitalea;	0	0	0	1	0	0	0	0	0	0	1	0	0	0	0	0
superkingdom_Bacteria;phylum_Proteobacteria;class_Alphaproteobacteria;order_Rhodobacterales;family_Rhodobacteraceae;genus_Sediminimonas;	0	0	0	0	0	0	0	0	1	0	0	0	0	0	0	0
superkingdom_Bacteria;phylum_Proteobacteria;class_Alphaproteobacteria;order_Rhodobacterales;family_Rhodobacteraceae;genus_Seohaeicola;	1	0	0	0	0	0	0	0	0	0	0	0	0	0	0	0
superkingdom_Bacteria;phylum_Proteobacteria;class_Alphaproteobacteria;order_Rhodobacterales;family_Rhodobacteraceae;genus_Shimia;	0	0	0	1	1	0	0	0	0	0	0	0	0	0	0	0
superkingdom_Bacteria;phylum_Proteobacteria;class_Alphaproteobacteria;order_Rhodobacterales;family_Rhodobacteraceae;genus_Silicimonas;	0	0	0	0	0	0	0	0	1	0	0	0	0	0	0	0
superkingdom_Bacteria;phylum_Proteobacteria;class_Alphaproteobacteria;order_Rhodobacterales;family_Rhodobacteraceae;genus_Stappia;	0	0	0	0	0	0	0	0	1	0	0	0	0	0	0	0
superkingdom_Bacteria;phylum_Proteobacteria;class_Alphaproteobacteria;order_Rhodobacterales;family_Rhodobacteraceae;genus_Sulfitobacter;	7	0	12	23	0	0	0	0	83	0	2	0	0	14	0	3
superkingdom_Bacteria;phylum_Proteobacteria;class_Alphaproteobacteria;order_Rhodobacterales;family_Rhodobacteraceae;genus_Sulfitobacter;species_Sulfitobacter donghicola;	0	0	1	0	0	0	0	0	0	0	0	0	0	0	0	0
superkingdom_Bacteria;phylum_Proteobacteria;class_Alphaproteobacteria;order_Rhodobacterales;family_Rhodobacteraceae;genus_Sulfitobacter;species_Sulfitobacter guttiformis;	0	0	1	0	0	0	0	0	0	0	0	0	0	0	0	0
superkingdom_Bacteria;phylum_Proteobacteria;class_Alphaproteobacteria;order_Rhodobacterales;family_Rhodobacteraceae;genus_Tabrizicola;	5	0	0	1	0	0	0	0	0	0	0	0	0	0	0	0
superkingdom_Bacteria;phylum_Proteobacteria;class_Alphaproteobacteria;order_Rhodobacterales;family_Rhodobacteraceae;genus_Tateyamaria;	0	0	0	0	0	0	0	0	0	0	0	0	0	0	0	2
superkingdom_Bacteria;phylum_Proteobacteria;class_Alphaproteobacteria;order_Rhodobacterales;family_Rhodobacteraceae;genus_Thalassobacter;	0	0	0	0	0	0	0	0	0	0	0	0	0	0	0	0
superkingdom_Bacteria;phylum_Proteobacteria;class_Alphaproteobacteria;order_Rhodobacterales;family_Rhodobacteraceae;genus_Thalassobium;	0	0	0	2	0	0	0	0	2	0	0	0	0	0	0	2
superkingdom_Bacteria;phylum_Proteobacteria;class_Alphaproteobacteria;order_Rhodobacterales;family_Rhodobacteraceae;genus_Thalassococcus;	0	0	0	0	0	0	0	0	1	0	0	0	0	0	0	0
superkingdom_Bacteria;phylum_Proteobacteria;class_Alphaproteobacteria;order_Rhodobacterales;family_Rhodobacteraceae;genus_Thioclava;	10	0	0	0	0	0	0	0	0	0	0	0	0	0	0	0
superkingdom_Bacteria;phylum_Proteobacteria;class_Alphaproteobacteria;order_Rhodobacterales;family_Rhodobacteraceae;genus_Tropicibacter;	0	0	0	1	0	0	0	0	0	0	0	0	0	0	0	0
superkingdom_Bacteria;phylum_Proteobacteria;class_Alphaproteobacteria;order_Rhodobacterales;family_Rhodobacteraceae;genus_Yoonia;	1	0	0	48	0	0	0	0	16	0	0	0	0	0	0	0
superkingdom_Bacteria;phylum_Proteobacteria;class_Alphaproteobacteria;order_Rhodobacterales;family_Rhodobacteraceae;genus_Zongyanglinia;	0	0	0	1	0	0	0	0	0	0	0	0	0	0	0	0
superkingdom_Bacteria;phylum_Proteobacteria;class_Alphaproteobacteria;order_Rhodospirillales;	61	0	0	22	0	0	0	0	22	0	54	1	0	0	0	0
superkingdom_Bacteria;phylum_Proteobacteria;class_Alphaproteobacteria;order_Rhodospirillales;family_Acetobacteraceae;genus_Acidisoma;	0	0	0	1	0	0	0	0	0	0	0	0	0	0	0	0
superkingdom_Bacteria;phylum_Proteobacteria;class_Alphaproteobacteria;order_Rhodospirillales;family_Acetobacteraceae;genus_Caldovatus;	1	0	0	0	0	0	0	0	0	0	0	0	0	0	0	0
superkingdom_Bacteria;phylum_Proteobacteria;class_Alphaproteobacteria;order_Rhodospirillales;family_Acetobacteraceae;genus_Gluconacetobacter;	0	0	0	1	0	0	0	0	0	0	0	0	0	0	0	0
superkingdom_Bacteria;phylum_Proteobacteria;class_Alphaproteobacteria;order_Rhodospirillales;family_Acetobacteraceae;genus_Roseomonas;	1	0	0	0	0	0	0	0	0	0	0	0	0	0	0	0
superkingdom_Bacteria;phylum_Proteobacteria;class_Alphaproteobacteria;order_Rhodospirillales;family_Acetobacteraceae;genus_Stella;	2	0	0	0	0	0	0	0	0	0	5	0	0	0	0	0
superkingdom_Bacteria;phylum_Proteobacteria;class_Alphaproteobacteria;order_Rhodospirillales;family_Geminicoccaceae;genus_Geminicoccus;	0	0	0	0	0	0	0	0	0	0	0	0	0	0	0	0
superkingdom_Bacteria;phylum_Proteobacteria;class_Alphaproteobacteria;order_Rhodospirillales;family_Rhodospirillaceae;	117	0	0	28	0	0	0	0	81	3	39	0	6	0	0	4
superkingdom_Bacteria;phylum_Proteobacteria;class_Alphaproteobacteria;order_Rhodospirillales;family_Rhodospirillaceae;genus_Caenispirillum;	0	0	3	0	0	0	0	0	0	0	0	0	0	0	0	0
superkingdom_Bacteria;phylum_Proteobacteria;class_Alphaproteobacteria;order_Rhodospirillales;family_Rhodospirillaceae;genus_Denitrobaculum;	0	0	0	0	0	0	0	0	0	0	0	0	0	0	0	0
superkingdom_Bacteria;phylum_Proteobacteria;class_Alphaproteobacteria;order_Rhodospirillales;family_Rhodospirillaceae;genus_Dongia;	0	0	0	2	0	0	0	0	2	0	0	0	0	0	0	0
superkingdom_Bacteria;phylum_Proteobacteria;class_Alphaproteobacteria;order_Rhodospirillales;family_Rhodospirillaceae;genus_Fodinicurvata;	0	0	0	0	0	0	0	0	0	0	0	0	0	0	0	0
superkingdom_Bacteria;phylum_Proteobacteria;class_Alphaproteobacteria;order_Rhodospirillales;family_Rhodospirillaceae;genus_Hwanghaeella;	3	0	0	8	0	0	0	0	3	0	1	0	4	0	0	0
superkingdom_Bacteria;phylum_Proteobacteria;class_Alphaproteobacteria;order_Rhodospirillales;family_Rhodospirillaceae;genus_Hypericibacter;	0	0	0	6	0	0	0	0	0	0	0	0	0	0	0	0
superkingdom_Bacteria;phylum_Proteobacteria;class_Alphaproteobacteria;order_Rhodospirillales;family_Rhodospirillaceae;genus_Inquilinus;	0	0	0	0	0	0	0	0	0	0	0	0	0	2	0	0
superkingdom_Bacteria;phylum_Proteobacteria;class_Alphaproteobacteria;order_Rhodospirillales;family_Rhodospirillaceae;genus_Limibacillus;	0	0	0	6	0	0	0	0	0	0	1	0	0	0	0	0
superkingdom_Bacteria;phylum_Proteobacteria;class_Alphaproteobacteria;order_Rhodospirillales;family_Rhodospirillaceae;genus_Limimonas;	0	0	0	0	0	0	0	0	1	0	0	0	0	0	0	0
superkingdom_Bacteria;phylum_Proteobacteria;class_Alphaproteobacteria;order_Rhodospirillales;family_Rhodospirillaceae;genus_Magnetovibrio;	3	0	0	0	0	0	0	0	0	0	10	0	2	0	0	0
superkingdom_Bacteria;phylum_Proteobacteria;class_Alphaproteobacteria;order_Rhodospirillales;family_Rhodospirillaceae;genus_Nisaea;	1	0	0	0	0	0	0	0	0	0	0	0	0	0	0	0
superkingdom_Bacteria;phylum_Proteobacteria;class_Alphaproteobacteria;order_Rhodospirillales;family_Rhodospirillaceae;genus_Oceanibaculum;	31	0	0	0	0	0	0	6	0	0	19	0	0	0	0	0
superkingdom_Bacteria;phylum_Proteobacteria;class_Alphaproteobacteria;order_Rhodospirillales;family_Rhodospirillaceae;genus_Pelagibius;	0	0	0	1	0	0	0	0	0	0	0	0	0	0	0	0
superkingdom_Bacteria;phylum_Proteobacteria;class_Alphaproteobacteria;order_Rhodospirillales;family_Rhodospirillaceae;genus_Roseospira;	0	0	0	0	0	0	0	0	0	0	0	0	0	0	0	0
superkingdom_Bacteria;phylum_Proteobacteria;class_Alphaproteobacteria;order_Rhodospirillales;family_Rhodospirillaceae;genus_Telmatospirillum;	1	0	0	0	0	0	0	0	0	0	0	0	0	0	0	0
superkingdom_Bacteria;phylum_Proteobacteria;class_Alphaproteobacteria;order_Rhodospirillales;family_Rhodospirillaceae;genus_Thalassobaculum;	11	0	0	5	0	0	0	0	4	0	13	0	15	0	0	0
superkingdom_Bacteria;phylum_Proteobacteria;class_Alphaproteobacteria;order_Rhodospirillales;family_Rhodospirillaceae;genus_Thalassospira;	0	0	0	1	0	0	0	0	0	0	0	0	0	0	0	1
superkingdom_Bacteria;phylum_Proteobacteria;class_Alphaproteobacteria;order_Rhodospirillales;family_Rhodospirillaceae;genus_Tistlia;	0	0	0	0	0	0	0	2	6	0	0	0	0	0	0	0
superkingdom_Bacteria;phylum_Proteobacteria;class_Alphaproteobacteria;order_Rhodospirillales;genus_Enhydrobacter;	11	0	0	0	0	0	0	0	0	0	0	0	0	0	0	0
superkingdom_Bacteria;phylum_Proteobacteria;class_Alphaproteobacteria;order_Rhodospirillales;genus_Reyranella;	15	0	0	0	0	0	0	0	0	4	2	0	0	1	0	0
superkingdom_Bacteria;phylum_Proteobacteria;class_Alphaproteobacteria;order_Rickettsiales;	19	0	0	1	0	0	0	0	12	0	2	0	0	0	0	0
superkingdom_Bacteria;phylum_Proteobacteria;class_Alphaproteobacteria;order_Sneathiellales;	7	0	0	0	0	0	0	0	0	2	0	1	0	0	0	0
superkingdom_Bacteria;phylum_Proteobacteria;class_Alphaproteobacteria;order_Sneathiellales;family_Sneathiellaceae;genus_Sneathiella;	0	0	0	1	0	0	0	0	0	0	0	0	9	0	0	0
superkingdom_Bacteria;phylum_Proteobacteria;class_Alphaproteobacteria;order_Sphingomonadales;	11	0	0	0	0	0	0	26	0	0	0	2	0	20	0	0
superkingdom_Bacteria;phylum_Proteobacteria;class_Alphaproteobacteria;order_Sphingomonadales;family_Erythrobacteraceae;genus_Altererythrobacter;	2	0	0	0	0	0	0	0	0	0	0	0	0	9	0	0
superkingdom_Bacteria;phylum_Proteobacteria;class_Alphaproteobacteria;order_Sphingomonadales;family_Erythrobacteraceae;genus_Erythrobacter;	5	0	0	0	0	0	0	0	0	0	0	0	0	0	0	0
superkingdom_Bacteria;phylum_Proteobacteria;class_Alphaproteobacteria;order_Sphingomonadales;family_Erythrobacteraceae;genus_Tsuneonella;	0	0	0	0	0	0	0	0	0	0	0	0	0	21	0	0
superkingdom_Bacteria;phylum_Proteobacteria;class_Alphaproteobacteria;order_Sphingomonadales;family_Sphingomonadaceae;	6	0	0	0	0	0	0	0	0	0	0	0	0	0	0	0
superkingdom_Bacteria;phylum_Proteobacteria;class_Alphaproteobacteria;order_Sphingomonadales;family_Sphingomonadaceae;genus_Novosphingobium;	10	0	0	0	0	0	0	0	0	0	0	0	0	1	8	0
superkingdom_Bacteria;phylum_Proteobacteria;class_Alphaproteobacteria;order_Sphingomonadales;family_Sphingomonadaceae;genus_Parasphingorhabdus;	6	0	0	0	0	0	0	0	0	0	0	0	0	0	0	0
superkingdom_Bacteria;phylum_Proteobacteria;class_Alphaproteobacteria;order_Sphingomonadales;family_Sphingomonadaceae;genus_Sphingobium;	11	0	0	0	0	0	0	5	0	1	0	0	0	0	0	0
superkingdom_Bacteria;phylum_Proteobacteria;class_Alphaproteobacteria;order_Sphingomonadales;family_Sphingomonadaceae;genus_Sphingomonas;	1	0	0	0	0	0	0	17	0	0	13	4	0	1	0	0
superkingdom_Bacteria;phylum_Proteobacteria;class_Alphaproteobacteria;order_Sphingomonadales;family_Sphingomonadaceae;genus_Sphingopyxis;	33	0	0	1	0	0	0	0	0	0	0	0	0	6	0	0
superkingdom_Bacteria;phylum_Proteobacteria;class_Alphaproteobacteria;order_Sphingomonadales;family_Sphingomonadaceae;genus_Sphingorhabdus;	22	0	0	0	0	0	0	0	0	0	0	0	0	0	0	0
superkingdom_Bacteria;phylum_Proteobacteria;class_Alphaproteobacteria;order_Sphingomonadales;family_Sphingomonadaceae;genus_Sphingosinicella;	1	0	0	0	0	0	0	1	0	0	0	0	0	0	0	0
superkingdom_Bacteria;phylum_Proteobacteria;class_Betaproteobacteria;	44	0	0	0	0	0	0	9	1	0	0	6	2	1	0	0
superkingdom_Bacteria;phylum_Proteobacteria;class_Betaproteobacteria;order_Burkholderiales;	5	0	0	0	0	0	0	0	0	0	0	0	0	0	0	0
superkingdom_Bacteria;phylum_Proteobacteria;class_Betaproteobacteria;order_Burkholderiales;family_Alcaligenaceae;genus_Castellaniella;	1	0	0	0	0	0	0	0	0	0	0	0	0	0	0	0
superkingdom_Bacteria;phylum_Proteobacteria;class_Betaproteobacteria;order_Burkholderiales;family_Alcaligenaceae;genus_Derxia;	0	0	0	0	0	0	0	0	0	0	0	0	0	0	0	1
superkingdom_Bacteria;phylum_Proteobacteria;class_Betaproteobacteria;order_Burkholderiales;family_Burkholderiaceae;	0	0	0	0	0	0	0	0	0	0	0	2	0	0	0	0
superkingdom_Bacteria;phylum_Proteobacteria;class_Betaproteobacteria;order_Burkholderiales;family_Burkholderiaceae;genus_Caballeronia;	0	0	0	3	0	0	0	0	0	0	0	0	0	0	0	0
superkingdom_Bacteria;phylum_Proteobacteria;class_Betaproteobacteria;order_Burkholderiales;family_Burkholderiaceae;genus_Cupriavidus;	2	0	0	0	0	0	0	0	0	0	0	1	0	0	0	0
superkingdom_Bacteria;phylum_Proteobacteria;class_Betaproteobacteria;order_Burkholderiales;family_Burkholderiaceae;genus_Limnobacter;	0	0	0	0	0	0	0	0	0	0	0	17	0	0	0	0
superkingdom_Bacteria;phylum_Proteobacteria;class_Betaproteobacteria;order_Burkholderiales;family_Comamonadaceae;	1	0	0	0	0	0	0	1	5	0	0	0	0	0	0	0
superkingdom_Bacteria;phylum_Proteobacteria;class_Betaproteobacteria;order_Burkholderiales;family_Comamonadaceae;genus_Acidovorax;	1	0	0	0	0	0	0	1	0	0	0	1	0	0	0	0
superkingdom_Bacteria;phylum_Proteobacteria;class_Betaproteobacteria;order_Burkholderiales;family_Comamonadaceae;genus_Alicycliphilus;	1	0	0	0	0	0	0	0	0	0	0	1	0	0	0	0
superkingdom_Bacteria;phylum_Proteobacteria;class_Betaproteobacteria;order_Burkholderiales;family_Comamonadaceae;genus_Alicycliphilus;species_Alicycliphilus denitrificans;	4	0	0	0	0	0	0	0	0	0	0	0	0	0	0	0
superkingdom_Bacteria;phylum_Proteobacteria;class_Betaproteobacteria;order_Burkholderiales;family_Comamonadaceae;genus_Comamonas;	0	0	0	0	0	0	0	0	0	0	0	1	0	0	0	0
superkingdom_Bacteria;phylum_Proteobacteria;class_Betaproteobacteria;order_Burkholderiales;family_Comamonadaceae;genus_Diaphorobacter;	1	0	0	0	0	0	0	0	0	0	0	0	0	0	0	0
superkingdom_Bacteria;phylum_Proteobacteria;class_Betaproteobacteria;order_Burkholderiales;family_Comamonadaceae;genus_Hydrogenophaga;	26	0	0	0	0	0	0	3	0	0	0	0	0	0	0	0
superkingdom_Bacteria;phylum_Proteobacteria;class_Betaproteobacteria;order_Burkholderiales;family_Comamonadaceae;genus_Polaromonas;	1	0	0	0	0	0	0	0	0	0	0	0	0	0	0	0
superkingdom_Bacteria;phylum_Proteobacteria;class_Betaproteobacteria;order_Burkholderiales;family_Comamonadaceae;genus_Rhodoferax;	0	0	0	0	0	0	0	0	7	0	0	0	0	0	0	0
superkingdom_Bacteria;phylum_Proteobacteria;class_Betaproteobacteria;order_Burkholderiales;family_Comamonadaceae;genus_Simplicispira;	3	0	0	0	0	0	0	0	0	0	0	0	0	0	0	0
superkingdom_Bacteria;phylum_Proteobacteria;class_Betaproteobacteria;order_Burkholderiales;family_Oxalobacteraceae;genus_Duganella;	0	0	0	0	0	0	0	0	0	3	0	0	0	0	0	0
superkingdom_Bacteria;phylum_Proteobacteria;class_Betaproteobacteria;order_Burkholderiales;family_Oxalobacteraceae;genus_Herbaspirillum;	0	0	0	0	0	0	0	0	0	1	0	0	0	0	0	0
superkingdom_Bacteria;phylum_Proteobacteria;class_Betaproteobacteria;order_Burkholderiales;family_Oxalobacteraceae;genus_Janthinobacterium;	0	0	0	0	0	0	0	2	0	5	0	0	0	0	0	0
superkingdom_Bacteria;phylum_Proteobacteria;class_Betaproteobacteria;order_Burkholderiales;family_Oxalobacteraceae;genus_Massilia;	2	0	0	0	0	0	0	0	0	0	0	0	0	0	0	0
superkingdom_Bacteria;phylum_Proteobacteria;class_Betaproteobacteria;order_Burkholderiales;family_Oxalobacteraceae;genus_Undibacterium;	0	0	0	0	0	0	0	0	0	2	0	0	0	0	0	0
superkingdom_Bacteria;phylum_Proteobacteria;class_Betaproteobacteria;order_Burkholderiales;genus_Aquabacterium;	0	0	0	0	0	0	0	0	0	0	0	3	0	0	0	0
superkingdom_Bacteria;phylum_Proteobacteria;class_Betaproteobacteria;order_Burkholderiales;genus_Rhizobacter;	4	0	0	0	0	0	0	0	0	0	0	0	0	0	0	0
superkingdom_Bacteria;phylum_Proteobacteria;class_Betaproteobacteria;order_Burkholderiales;genus_Rubrivivax;	4	0	0	0	0	0	0	0	0	0	0	0	0	0	0	0
superkingdom_Bacteria;phylum_Proteobacteria;class_Betaproteobacteria;order_Nitrosomonadales;family_Sterolibacteriaceae;genus_Denitratisoma;	0	0	0	0	0	0	0	1	0	0	0	0	0	0	0	0
superkingdom_Bacteria;phylum_Proteobacteria;class_Betaproteobacteria;order_Nitrosomonadales;family_Sterolibacteriaceae;genus_Methyloversatilis;	2	0	0	0	0	0	0	0	0	0	0	0	0	0	0	0
superkingdom_Bacteria;phylum_Proteobacteria;class_Betaproteobacteria;order_Rhodocyclales;family_Rhodocyclaceae;	0	0	0	0	0	0	0	2	0	0	0	0	0	0	0	0
superkingdom_Bacteria;phylum_Proteobacteria;class_Betaproteobacteria;order_Rhodocyclales;family_Zoogloeaceae;genus_Azoarcus;	0	0	0	0	0	0	0	0	0	0	0	7	0	0	0	0
superkingdom_Bacteria;phylum_Proteobacteria;class_Candidatus Lambdaproteobacteria;	2	0	0	49	0	0	0	0	55	0	4	0	0	0	0	36
superkingdom_Bacteria;phylum_Proteobacteria;class_Deltaproteobacteria;	14	0	0	40	0	0	0	0	56	2	27	0	0	9	0	7
superkingdom_Bacteria;phylum_Proteobacteria;class_Deltaproteobacteria;order_Bradymonadales;	0	0	0	0	0	0	0	0	0	0	0	0	0	0	0	0
superkingdom_Bacteria;phylum_Proteobacteria;class_Deltaproteobacteria;order_Desulfobacterales;	0	0	0	1	0	0	0	0	0	0	0	0	0	0	0	0
superkingdom_Bacteria;phylum_Proteobacteria;class_Deltaproteobacteria;order_Desulfobacterales;family_Desulfobacteraceae;	1	0	0	0	0	0	0	0	0	0	0	0	0	1	0	0
superkingdom_Bacteria;phylum_Proteobacteria;class_Deltaproteobacteria;order_Desulfobacterales;family_Desulfobulbaceae;genus_Desulfopila;	0	0	0	1	0	0	0	0	0	0	0	0	0	2	0	0
superkingdom_Bacteria;phylum_Proteobacteria;class_Deltaproteobacteria;order_Myxococcales;	4	0	0	0	0	0	0	0	0	0	0	0	0	0	0	0
superkingdom_Bacteria;phylum_Proteobacteria;class_Deltaproteobacteria;order_Myxococcales;family_Nannocystaceae;	0	0	0	0	0	0	0	0	0	0	0	0	0	0	0	0
superkingdom_Bacteria;phylum_Proteobacteria;class_Deltaproteobacteria;order_Myxococcales;family_Sandaracinaceae;genus_Sandaracinus;	0	0	0	0	0	0	0	0	0	0	0	0	0	0	0	0
superkingdom_Bacteria;phylum_Proteobacteria;class_Epsilonproteobacteria;order_Campylobacterales;family_Thiovulaceae;genus_Sulfurimonas;	0	0	0	0	0	0	0	0	16	0	0	0	0	0	0	0
superkingdom_Bacteria;phylum_Proteobacteria;class_Gammaproteobacteria;	494	0	0	293	0	0	0	122	560	15	152	34	0	28	0	103
superkingdom_Bacteria;phylum_Proteobacteria;class_Gammaproteobacteria;genus_Candidatus Thioglobus;	0	0	0	312	0	0	0	0	252	0	7	0	0	0	0	62
superkingdom_Bacteria;phylum_Proteobacteria;class_Gammaproteobacteria;genus_Pseudohongiella;	3	0	0	0	0	0	0	0	0	0	0	0	0	8	0	0
superkingdom_Bacteria;phylum_Proteobacteria;class_Gammaproteobacteria;order_Acidiferrobacterales;family_Acidiferrobacteraceae;	3	0	0	38	0	0	0	0	39	0	0	0	0	0	0	2
superkingdom_Bacteria;phylum_Proteobacteria;class_Gammaproteobacteria;order_Aeromonadales;family_Aeromonadaceae;genus_Zobellella;	2	0	0	0	0	0	0	0	0	0	0	0	0	0	0	0
superkingdom_Bacteria;phylum_Proteobacteria;class_Gammaproteobacteria;order_Alteromonadales;family_Alteromonadaceae;	1	0	0	0	0	0	0	0	1	0	0	5	0	0	0	0
superkingdom_Bacteria;phylum_Proteobacteria;class_Gammaproteobacteria;order_Alteromonadales;family_Alteromonadaceae;genus_Aestuariibacter;	2	0	0	0	0	0	0	0	0	0	0	0	0	0	0	0
superkingdom_Bacteria;phylum_Proteobacteria;class_Gammaproteobacteria;order_Alteromonadales;family_Alteromonadaceae;genus_Bowmanella;	0	0	0	0	0	0	0	1	0	0	0	0	0	0	0	0
superkingdom_Bacteria;phylum_Proteobacteria;class_Gammaproteobacteria;order_Alteromonadales;family_Alteromonadaceae;genus_Marinobacter;	1	0	0	0	0	0	0	7	2	0	0	18	0	8	0	0
superkingdom_Bacteria;phylum_Proteobacteria;class_Gammaproteobacteria;order_Alteromonadales;family_Alteromonadaceae;genus_Paraglaciecola;	15	0	0	0	0	0	0	0	0	0	0	0	0	22	0	0
superkingdom_Bacteria;phylum_Proteobacteria;class_Gammaproteobacteria;order_Alteromonadales;family_Colwelliaceae;genus_Colwellia;	0	0	0	0	0	0	0	0	0	0	1	0	0	0	0	11
superkingdom_Bacteria;phylum_Proteobacteria;class_Gammaproteobacteria;order_Alteromonadales;family_Colwelliaceae;genus_Thalassotalea;	0	0	0	0	0	0	0	0	0	0	0	0	0	2	0	0
superkingdom_Bacteria;phylum_Proteobacteria;class_Gammaproteobacteria;order_Alteromonadales;family_Shewanellaceae;	0	0	0	0	0	0	0	0	0	0	2	0	0	0	0	0
superkingdom_Bacteria;phylum_Proteobacteria;class_Gammaproteobacteria;order_Alteromonadales;family_Shewanellaceae;genus_Shewanella;	0	0	0	0	0	0	10	1	0	0	10	0	0	0	0	0
superkingdom_Bacteria;phylum_Proteobacteria;class_Gammaproteobacteria;order_Alteromonadales;family_Shewanellaceae;genus_Shewanella;species_Shewanella frigidimarina;	0	0	0	0	0	0	1	0	0	0	0	0	0	0	0	0
superkingdom_Bacteria;phylum_Proteobacteria;class_Gammaproteobacteria;order_Cellvibrionales;	0	0	0	0	0	0	0	0	0	0	0	0	0	1	0	0
superkingdom_Bacteria;phylum_Proteobacteria;class_Gammaproteobacteria;order_Cellvibrionales;family_Cellvibrionaceae;genus_Cellvibrio;	0	0	0	0	0	0	0	1	0	0	0	0	0	0	0	0
superkingdom_Bacteria;phylum_Proteobacteria;class_Gammaproteobacteria;order_Cellvibrionales;family_Cellvibrionaceae;genus_Pseudomaricurvus;	0	0	0	0	0	0	0	0	0	0	1	0	0	0	0	0
superkingdom_Bacteria;phylum_Proteobacteria;class_Gammaproteobacteria;order_Cellvibrionales;family_Cellvibrionaceae;genus_Simiduia;	1	0	0	0	0	0	0	0	0	0	0	0	0	0	0	0
superkingdom_Bacteria;phylum_Proteobacteria;class_Gammaproteobacteria;order_Cellvibrionales;family_Halieaceae;	21	0	0	0	0	0	0	0	26	0	0	0	0	0	0	0
superkingdom_Bacteria;phylum_Proteobacteria;class_Gammaproteobacteria;order_Cellvibrionales;family_Halieaceae;genus_Haliea;	2	0	0	0	0	0	0	0	0	0	0	1	0	0	0	0
superkingdom_Bacteria;phylum_Proteobacteria;class_Gammaproteobacteria;order_Cellvibrionales;family_Halieaceae;genus_Halioglobus;	1	0	0	0	0	0	0	0	0	0	0	0	0	0	0	0
superkingdom_Bacteria;phylum_Proteobacteria;class_Gammaproteobacteria;order_Cellvibrionales;family_Halieaceae;genus_Kineobactrum;	1	0	0	0	0	0	0	0	0	0	0	0	0	0	0	0
superkingdom_Bacteria;phylum_Proteobacteria;class_Gammaproteobacteria;order_Cellvibrionales;family_Halieaceae;genus_Luminiphilus;	0	0	0	0	0	0	0	0	3	0	0	0	0	0	0	0
superkingdom_Bacteria;phylum_Proteobacteria;class_Gammaproteobacteria;order_Cellvibrionales;family_Halieaceae;genus_Parahaliea;	6	0	0	0	0	0	0	0	0	0	0	0	0	0	0	0
superkingdom_Bacteria;phylum_Proteobacteria;class_Gammaproteobacteria;order_Cellvibrionales;family_Porticoccaceae;	147	0	0	0	0	0	0	0	131	0	0	0	0	1	0	0
superkingdom_Bacteria;phylum_Proteobacteria;class_Gammaproteobacteria;order_Cellvibrionales;family_Porticoccaceae;genus_Porticoccus;	0	0	0	0	0	0	0	0	0	0	0	0	0	0	0	9
superkingdom_Bacteria;phylum_Proteobacteria;class_Gammaproteobacteria;order_Cellvibrionales;family_Spongiibacteraceae;	3	0	0	0	0	0	0	0	0	0	0	0	0	0	0	0
superkingdom_Bacteria;phylum_Proteobacteria;class_Gammaproteobacteria;order_Cellvibrionales;family_Spongiibacteraceae;genus_Dasania;	0	0	0	0	0	0	0	0	0	0	0	0	0	0	0	1
superkingdom_Bacteria;phylum_Proteobacteria;class_Gammaproteobacteria;order_Cellvibrionales;family_Spongiibacteraceae;genus_Marortus;	14	0	0	0	0	0	0	0	0	0	0	0	0	0	0	0
superkingdom_Bacteria;phylum_Proteobacteria;class_Gammaproteobacteria;order_Cellvibrionales;family_Spongiibacteraceae;genus_Oceanicoccus;	0	0	0	0	0	0	0	0	0	0	0	0	0	0	0	0
superkingdom_Bacteria;phylum_Proteobacteria;class_Gammaproteobacteria;order_Cellvibrionales;family_Spongiibacteraceae;genus_Spongiibacter;	13	0	0	0	0	0	0	0	0	0	0	0	0	0	0	0
superkingdom_Bacteria;phylum_Proteobacteria;class_Gammaproteobacteria;order_Cellvibrionales;family_Spongiibacteraceae;genus_Zhongshania;	3	0	0	0	0	0	0	0	0	0	0	0	0	0	0	0
superkingdom_Bacteria;phylum_Proteobacteria;class_Gammaproteobacteria;order_Chromatiales;	0	0	0	0	0	0	0	0	21	0	0	0	0	0	0	3
superkingdom_Bacteria;phylum_Proteobacteria;class_Gammaproteobacteria;order_Chromatiales;family_Chromatiaceae;genus_Rheinheimera;	0	0	0	0	0	0	0	12	0	0	0	0	0	0	0	0
superkingdom_Bacteria;phylum_Proteobacteria;class_Gammaproteobacteria;order_Chromatiales;family_Ectothiorhodospiraceae;genus_Oceanococcus;	2	0	0	0	0	0	0	0	0	0	0	0	0	0	0	0
superkingdom_Bacteria;phylum_Proteobacteria;class_Gammaproteobacteria;order_Chromatiales;family_Ectothiorhodospiraceae;genus_Thioalkalivibrio;	0	0	0	0	0	0	0	0	0	0	0	0	0	1	0	0
superkingdom_Bacteria;phylum_Proteobacteria;class_Gammaproteobacteria;order_Chromatiales;family_Granulosicoccaceae;genus_Granulosicoccus;	2	0	0	0	0	0	0	0	0	0	0	0	0	0	0	0
superkingdom_Bacteria;phylum_Proteobacteria;class_Gammaproteobacteria;order_Chromatiales;family_Woeseiaceae;	0	0	0	1	0	0	0	0	16	0	0	0	0	0	0	0
superkingdom_Bacteria;phylum_Proteobacteria;class_Gammaproteobacteria;order_Chromatiales;family_Woeseiaceae;genus_Woeseia;	0	0	0	0	0	0	0	0	5	0	0	0	0	0	0	0
superkingdom_Bacteria;phylum_Proteobacteria;class_Gammaproteobacteria;order_Enterobacterales;family_Enterobacteriaceae;genus_Escherichia;	0	0	0	1	0	0	0	0	0	0	0	0	0	0	0	0
superkingdom_Bacteria;phylum_Proteobacteria;class_Gammaproteobacteria;order_Enterobacterales;family_Erwiniaceae;genus_Pantoea;	1	0	0	0	0	0	0	0	0	0	0	0	0	0	0	0
superkingdom_Bacteria;phylum_Proteobacteria;class_Gammaproteobacteria;order_Immundisolibacterales;family_Immundisolibacteraceae;genus_Immundisolibacter;	16	0	0	0	0	0	0	18	0	0	0	0	0	0	0	0
superkingdom_Bacteria;phylum_Proteobacteria;class_Gammaproteobacteria;order_Methylococcales;family_Methylococcaceae;	0	0	0	0	0	0	0	1	0	0	0	0	0	0	0	0
superkingdom_Bacteria;phylum_Proteobacteria;class_Gammaproteobacteria;order_Nevskiales;family_Algiphilaceae;genus_Algiphilus;	0	0	0	0	0	0	0	0	0	0	0	0	0	1	0	0
superkingdom_Bacteria;phylum_Proteobacteria;class_Gammaproteobacteria;order_Nevskiales;family_Sinobacteraceae;genus_Nevskia;	0	0	0	0	0	0	0	0	0	0	0	0	0	3	0	0
superkingdom_Bacteria;phylum_Proteobacteria;class_Gammaproteobacteria;order_Nevskiales;family_Sinobacteraceae;genus_Polycyclovorans;	0	0	0	0	0	0	0	0	0	0	0	0	0	12	0	0
superkingdom_Bacteria;phylum_Proteobacteria;class_Gammaproteobacteria;order_Nevskiales;family_Sinobacteraceae;genus_Solimonas;	0	0	0	0	0	0	0	0	0	0	0	0	0	1	0	0
superkingdom_Bacteria;phylum_Proteobacteria;class_Gammaproteobacteria;order_Nevskiales;family_Steroidobacteraceae;genus_Povalibacter;	0	0	0	0	0	0	0	0	0	0	0	0	0	1	0	0
superkingdom_Bacteria;phylum_Proteobacteria;class_Gammaproteobacteria;order_Oceanospirillales;family_Alcanivoracaceae;genus_Alcanivorax;	0	0	0	0	0	0	0	0	0	0	0	0	0	0	0	0
superkingdom_Bacteria;phylum_Proteobacteria;class_Gammaproteobacteria;order_Oceanospirillales;family_Halomonadaceae;	2	0	0	0	0	0	0	0	0	0	0	0	0	0	0	1
superkingdom_Bacteria;phylum_Proteobacteria;class_Gammaproteobacteria;order_Oceanospirillales;family_Halomonadaceae;genus_Cobetia;	2	0	0	0	0	0	0	0	0	0	0	0	0	0	0	1
superkingdom_Bacteria;phylum_Proteobacteria;class_Gammaproteobacteria;order_Oceanospirillales;family_Halomonadaceae;genus_Halomonas;	14	0	0	12	0	0	0	0	3	0	0	0	0	0	0	0
superkingdom_Bacteria;phylum_Proteobacteria;class_Gammaproteobacteria;order_Oceanospirillales;family_Halomonadaceae;genus_Modicisalibacter;	0	0	0	0	0	0	0	0	0	0	0	0	0	0	0	0
superkingdom_Bacteria;phylum_Proteobacteria;class_Gammaproteobacteria;order_Oceanospirillales;family_Kangiellaceae;genus_Aliikangiella;	0	0	0	0	0	0	0	0	0	0	0	0	0	0	0	0
superkingdom_Bacteria;phylum_Proteobacteria;class_Gammaproteobacteria;order_Oceanospirillales;family_Oceanospirillaceae;	0	0	0	26	0	0	0	0	140	0	0	1	0	0	0	53
superkingdom_Bacteria;phylum_Proteobacteria;class_Gammaproteobacteria;order_Oceanospirillales;family_Oceanospirillaceae;genus_Amphritea;	3	0	0	0	0	0	0	0	0	0	0	0	0	0	0	0
superkingdom_Bacteria;phylum_Proteobacteria;class_Gammaproteobacteria;order_Oceanospirillales;family_Oceanospirillaceae;genus_Marinobacterium;	0	0	0	1	0	0	0	0	0	0	0	0	0	0	0	0
superkingdom_Bacteria;phylum_Proteobacteria;class_Gammaproteobacteria;order_Oceanospirillales;family_Oceanospirillaceae;genus_Marinomonas;	0	0	0	2	0	0	0	0	0	0	0	0	0	0	0	0
superkingdom_Bacteria;phylum_Proteobacteria;class_Gammaproteobacteria;order_Oceanospirillales;family_Oceanospirillaceae;genus_Neptunomonas;	1	0	0	0	0	0	0	0	0	0	0	0	0	0	0	0
superkingdom_Bacteria;phylum_Proteobacteria;class_Gammaproteobacteria;order_Oceanospirillales;family_Oceanospirillaceae;genus_Nitrincola;	0	0	0	0	0	0	0	0	1	0	0	0	0	0	0	0
superkingdom_Bacteria;phylum_Proteobacteria;class_Gammaproteobacteria;order_Oceanospirillales;family_Oceanospirillaceae;genus_Oceanobacter;	3	0	0	0	0	0	0	0	0	0	0	0	0	0	0	0
superkingdom_Bacteria;phylum_Proteobacteria;class_Gammaproteobacteria;order_Oceanospirillales;family_Oceanospirillaceae;genus_Oleispira;species_Oleispira antarctica;	0	0	0	0	0	0	0	0	0	0	0	0	0	0	0	1
superkingdom_Bacteria;phylum_Proteobacteria;class_Gammaproteobacteria;order_Oceanospirillales;family_Oleiphilaceae;genus_Oleiphilus;	0	0	0	0	0	0	0	21	0	0	0	0	0	0	0	0
superkingdom_Bacteria;phylum_Proteobacteria;class_Gammaproteobacteria;order_Oceanospirillales;family_Saccharospirillaceae;genus_Reinekea;	0	0	0	1	0	0	0	0	0	0	0	0	0	0	0	0
superkingdom_Bacteria;phylum_Proteobacteria;class_Gammaproteobacteria;order_Oceanospirillales;family_Saccharospirillaceae;genus_Saccharospirillum;	0	0	0	13	0	0	0	0	0	0	0	0	0	0	0	0
superkingdom_Bacteria;phylum_Proteobacteria;class_Gammaproteobacteria;order_Pseudomonadales;	3	0	0	2	0	0	0	3	3	1	0	0	0	3	0	0
superkingdom_Bacteria;phylum_Proteobacteria;class_Gammaproteobacteria;order_Pseudomonadales;family_Moraxellaceae;	0	0	0	1	0	0	0	0	0	0	0	0	0	0	0	0
superkingdom_Bacteria;phylum_Proteobacteria;class_Gammaproteobacteria;order_Pseudomonadales;family_Moraxellaceae;genus_Acinetobacter;	11	0	0	0	0	0	0	0	0	26	0	0	0	0	0	0
superkingdom_Bacteria;phylum_Proteobacteria;class_Gammaproteobacteria;order_Pseudomonadales;family_Moraxellaceae;genus_Psychrobacter;	2	0	0	1	0	0	0	0	0	0	0	0	0	0	0	0
superkingdom_Bacteria;phylum_Proteobacteria;class_Gammaproteobacteria;order_Pseudomonadales;family_Pseudomonadaceae;	0	0	0	11	0	0	0	0	0	16	0	1	0	0	0	4
superkingdom_Bacteria;phylum_Proteobacteria;class_Gammaproteobacteria;order_Pseudomonadales;family_Pseudomonadaceae;genus_Permianibacter;	0	0	0	0	0	0	0	1	0	0	0	0	0	0	0	0
superkingdom_Bacteria;phylum_Proteobacteria;class_Gammaproteobacteria;order_Pseudomonadales;family_Pseudomonadaceae;genus_Pseudomonas;	49	0	0	25	0	0	0	21	0	45	0	28	0	6	0	48
superkingdom_Bacteria;phylum_Proteobacteria;class_Gammaproteobacteria;order_Salinisphaerales;family_Salinisphaeraceae;genus_Salinisphaera;	0	0	1	0	0	0	0	0	0	0	0	0	0	0	0	0
superkingdom_Bacteria;phylum_Proteobacteria;class_Gammaproteobacteria;order_Thiotrichales;	0	0	0	22	0	0	0	0	7	0	0	0	0	0	0	54
superkingdom_Bacteria;phylum_Proteobacteria;class_Gammaproteobacteria;order_Thiotrichales;family_Piscirickettsiaceae;	0	0	0	0	0	0	0	0	0	0	0	0	0	2	0	0
superkingdom_Bacteria;phylum_Proteobacteria;class_Gammaproteobacteria;order_Thiotrichales;family_Piscirickettsiaceae;genus_Cycloclasticus;	0	0	0	0	0	0	0	0	0	0	0	0	0	1	0	0
superkingdom_Bacteria;phylum_Proteobacteria;class_Gammaproteobacteria;order_Thiotrichales;family_Piscirickettsiaceae;genus_Methylophaga;	0	0	0	0	0	0	0	0	0	0	0	0	0	0	0	5
superkingdom_Bacteria;phylum_Proteobacteria;class_Gammaproteobacteria;order_Thiotrichales;family_Thiotrichaceae;genus_Leucothrix;	5	0	0	0	0	0	0	0	0	0	0	0	0	0	0	0
superkingdom_Bacteria;phylum_Proteobacteria;class_Gammaproteobacteria;order_Xanthomonadales;	0	0	0	0	0	0	0	2	0	0	0	0	0	0	0	0
superkingdom_Bacteria;phylum_Proteobacteria;class_Gammaproteobacteria;order_Xanthomonadales;family_Xanthomonadaceae;	0	0	0	0	0	0	0	0	0	0	0	0	0	1	0	1
superkingdom_Bacteria;phylum_Proteobacteria;class_Gammaproteobacteria;order_Xanthomonadales;family_Xanthomonadaceae;genus_Arenimonas;	0	0	0	0	0	0	0	0	0	0	0	0	0	39	0	0
superkingdom_Bacteria;phylum_Proteobacteria;class_Gammaproteobacteria;order_Xanthomonadales;family_Xanthomonadaceae;genus_Luteimonas;	2	0	0	0	0	0	0	0	0	0	0	0	0	1	0	0
superkingdom_Bacteria;phylum_Proteobacteria;class_Gammaproteobacteria;order_Xanthomonadales;family_Xanthomonadaceae;genus_Lysobacter;	0	0	0	0	0	0	0	1	0	0	0	0	0	2	0	0
superkingdom_Bacteria;phylum_Proteobacteria;class_Gammaproteobacteria;order_Xanthomonadales;family_Xanthomonadaceae;genus_Pseudoxanthomonas;	0	0	0	0	0	0	0	24	0	0	0	0	0	2	0	0
superkingdom_Bacteria;phylum_Rhodothermaeota;class_Rhodothermia;order_Rhodothermales;family_Rubricoccaceae;genus_Rubrivirga;	0	0	0	0	0	0	0	0	0	0	0	0	0	0	0	0
superkingdom_Bacteria;phylum_Spirochaetes;class_Spirochaetia;order_Leptospirales;	0	0	0	0	0	0	0	0	0	0	0	0	0	0	0	0
superkingdom_Bacteria;phylum_Spirochaetes;class_Spirochaetia;order_Leptospirales;family_Leptospiraceae;genus_Leptospira;	0	0	0	0	0	0	0	0	0	0	0	0	0	0	0	0
superkingdom_Bacteria;phylum_Verrucomicrobia;	0	0	0	0	0	0	0	0	0	0	1	0	0	0	0	0
superkingdom_Bacteria;phylum_Verrucomicrobia;class_Opitutae;	0	0	0	0	1	0	0	0	0	0	0	0	0	0	0	0
superkingdom_Bacteria;phylum_Verrucomicrobia;class_Opitutae;order_Opitutales;family_Opitutaceae;	0	0	0	0	0	0	0	0	0	0	0	0	0	0	0	0
superkingdom_Bacteria;phylum_Verrucomicrobia;class_Opitutae;order_Puniceicoccales;family_Puniceicoccaceae;	0	0	0	0	0	0	0	0	0	0	0	0	0	0	0	0
superkingdom_Bacteria;phylum_Verrucomicrobia;class_Verrucomicrobiae;order_Verrucomicrobiales;	0	0	0	0	0	0	0	0	0	0	0	0	0	1	0	0
superkingdom_Bacteria;phylum_Verrucomicrobia;class_Verrucomicrobiae;order_Verrucomicrobiales;family_Rubritaleaceae;genus_Rubritalea;species_Rubritalea squalenifaciens;	0	0	0	0	0	0	0	0	0	0	0	0	0	0	0	0
superkingdom_Bacteria;phylum_Verrucomicrobia;class_Verrucomicrobiae;order_Verrucomicrobiales;family_Verrucomicrobiaceae;genus_Roseibacillus;	0	0	0	0	0	0	0	0	0	0	0	0	0	0	0	0
superkingdom_Eukaryota;class_Dinophyceae;order_Suessiales;family_Symbiodiniaceae;genus_Symbiodinium;	7	0	0	0	0	0	0	0	0	0	0	0	0	1	0	0
superkingdom_Eukaryota;phylum_Bacillariophyta;class_Bacillariophyceae;order_Bacillariales;family_Bacillariaceae;genus_Fragilariopsis;species_Fragilariopsis cylindrus;	0	0	0	0	0	0	0	0	0	0	0	0	2	0	0	0
superkingdom_Eukaryota;phylum_Chlorophyta;class_Chlorophyceae;order_Chlamydomonadales;family_Chlamydomonadaceae;genus_Chlamydomonas;	0	0	0	0	0	0	0	0	0	0	0	0	0	0	0	0
superkingdom_Eukaryota;phylum_Chlorophyta;class_Mamiellophyceae;order_Mamiellales;family_Mamiellaceae;genus_Micromonas;	0	0	0	0	0	0	0	0	0	0	0	0	0	0	0	0
superkingdom_Eukaryota;phylum_Haptista;class_Haptophyta;order_Isochrysidales;family_Noelaerhabdaceae;genus_Emiliania;species_Emiliania huxleyi;	1	0	0	0	0	0	0	0	0	0	0	0	0	0	0	0

## Sheet: Table S9
Table S9 Occurrence of DMS/DMSP related genes in genomes from IMG/M database.
IMG genome ID	proteins
2880574310	DddD	DdhA
2880774395	DddD	DdhA
2501004205	DddD	DddL
2902691746	DddD	DddL
2724679120	DddD	DddQ
2706794522	DddD	MddA
2893706316	DddD	DddQ
2832309219	DddD	DsoB
2880780866	DddD	DdhA
2882936267	DddD	DdhA
2880560698	DddD	DdhA
2502171175	DddD	DdhA
2831727837	DddD	DmdA
2838815393	DddD	DdhA
2651870079	DddD	DddP
2883466690	DddD	DdhA
2687453330	DddD	DsoB
2881232178	DddD	DsoB
2599185211	DddD	Tmm
638341247	DddD	DsoB
2890575490	DddD	DsoB
2506520053	DddD	DsoB
2617270735	DddD	MddA
2716884824	DddK	DmdA
2716884336	DddK	DmdA
2716884335	DddK	DmdA
2521172709	DddK	DmdA
2503982040	DddK	DmdA
2773857876	DddK	DmdA
2837358148	DddL	DddP
2517572147	DddL	DsyB
2889710936	DddL	MmtN
2698536701	DddL	DddP
2545555844	DddL	DMSOR
2895608686	DddL	DddP
2883834571	DddL	DddP
2883768972	DddL	DMSOR
2890463227	DddL	DsyB
2687453445	DddL	DMSOR
2721755735	DddL	DMSOR
2825930402	DddL	DMSOR
2834868767	DddL	DMSOR
2825941428	DddL	DMSOR
2847273964	DddL	DMSOR
2843880549	DddL	DMSOR
2681813553	DddL	DMSOR
2843871729	DddL	DMSOR
2512875023	DddL	DMSOR
640069328	DddL	DMSOR
2891616798	DddL	DsyB
2891652662	DddL	DddP
2840878972	DddL	DddP
2834148589	DddL	Tmm
2825700977	DddL	DMSOR
2788500336	DddL	DsyB
2832770347	DddL	DddP
2740892146	DddL	DmdA
2832334322	DddL	DsyB
2667527406	DddL	DsyB
2816332388	DddL	DsyB
2693429871	DddL	DddP
2847278401	DddL	DMSOR
2816332429	DddL	Tmm
2816332391	DddL	DsyB
2814123072	DddL	DmdA
2834652479	DddL	DmdA
2818991432	DddL	Tmm
2802429266	DddL	Tmm
2795385466	DddL	Tmm
2593339286	DddL	Tmm
2698536347	DddL	DmdA
2838091430	DddL	Tmm
2802428810	DddL	DmdA
2816332395	DddL	Tmm
2582580507	DddL	Tmm
2603880215	DddL	Tmm
2831655652	DddL	Tmm
2608642197	DddL	Tmm
2901664502	DddL	DddP
2882163504	DddL	DsyB
2627854218	DddL	DddP
2890044741	DddL	DsyB
2889169733	DddL	DmdA
2754412429	DddL	DmdA
2596583627	DddL	DsyB
2889164208	DddL	DmdA
2828464391	DddL	DmdA
2574180243	DddL	DddP
2588253841	DddL	DddP
639857019	DddL	DsyB
651324095	DddL	DMSOR
2740892280	DddL	DsyB
2724679813	DddL	DsyB
2895340002	DddL	DsyB
2675903213	DddL	DmdA
2832099053	DddL	DddP
2579778790	DddL	DddP
2627854264	DddL	DddP
2898945296	DddL	DmdA
2770939548	DddL	DddP
2711768027	DddL	DmdA
2808606915	DddL	DsyB
2728369485	DddL	DmdA
2718217880	DddL	DsyB
2740892185	DddL	DsyB
2740892191	DddL	DsyB
2895313911	DddL	DsyB
2827789216	DddL	DsyB
2884533225	DddL	DsyB
2895307870	DddL	DsyB
2884539680	DddL	DsyB
2884514219	DddL	DsyB
2884546135	DddL	DsyB
2889157821	DddL	DsyB
2737471612	DddL	DmdA
2786546804	DddL	DmdA
2721755576	DddL	DddP
2579778904	DddL	DmdA
2895612895	DddP	DmdA
2811995119	DddP	DmdA
2823623907	DddP	DddQ
2887763854	DddP	DmdA
2695420937	DddP	DmdA
2894895117	DddP	DmdA
2841901924	DddP	DddW
2706794655	DddP	DmdA
2744055041	DddP	DddW
2627854045	DddP	DmdA
647533206	DddP	DmdA
2622736589	DddP	DmdA
2898191822	DddP	DmdA
2788500276	DddP	DmdA
2773857836	DddP	DmdA
2811995092	DddP	DmdA
2651870277	DddP	DmdA
2671180211	DddP	DmdA
2833274672	DddP	DmdA
2548877138	DddP	DddQ
2504756015	DddP	DmdA
2788500140	DddP	DmdA
2698536702	DddP	DmdA
2654588005	DddP	DmdA
2626541597	DddP	DmdA
2772190752	DddP	DddW
2791354889	DddP	DmdA
2524023154	DddP	DddW
2839538856	DddP	DmdA
2816332431	DddP	DddQ
2881259325	DddP	DddW
2831847739	DddP	DmdA
2816332394	DddP	DmdA
2832320676	DddP	DmdA
2811995082	DddP	DmdA
2811995093	DddP	DmdA
2816332392	DddP	DddQ
2816332413	DddP	DmdA
2881356017	DddP	DmdA
2651870280	DddP	DmdA
2839785767	DddP	DddW
2808606425	DddP	DmdA
2811995096	DddP	DmdA
2788500502	DddP	DmdA
2518285587	DddP	DmdA
640963035	DddP	DmdA
2510065042	DddP	DmdA
2884117770	DddP	DddQ
2788500465	DddP	DmdA
2700988697	DddP	DmdA
2806310413	DddP	Tmm
2837687090	DddP	DmdA
2840613526	DddP	DmdA
2788500135	DddP	DmdA
2895600164	DddP	DmdA
2772190778	DddP	DmdA
2521172554	DddP	DmdA
647533238	DddP	DmdA
2788500468	DddP	DmdA
2788500470	DddP	DmdA
2740892137	DddP	DmdA
2740892143	DddP	DmdA
2740892176	DddP	DmdA
2706794654	DddP	DmdA
2889183490	DddP	DmdA
2838952725	DddP	DmdA
2788500509	DddP	DmdA
2816332380	DddP	DmdA
2582580979	DddP	DmdA
2829970415	DddP	DmdA
2734482174	DddP	DddQ
2832291267	DddP	DddQ
2788499969	DddP	DmdA
2619619004	DddP	DmdA
2898803745	DddP	Tmm
2832804499	DddP	Tmm
2648501248	DddP	DmdA
637000137	DddP	DmdA
2881895099	DddP	DmdA
2734482252	DddP	Tmm
2651870274	DddP	DmdA
2695421013	DddP	DmdA
2811995087	DddP	DmdA
2889135909	DddP	DmdA
2806310615	DddP	DmdA
2816332533	DddP	DmdA
2710724219	DddP	DmdA
2816332498	DddP	DmdA
2816332507	DddP	DmdA
2816332503	DddP	DmdA
2816332383	DddP	DmdA
2806310612	DddP	DddW
2816332440	DddP	DmdA
2816332382	DddP	DmdA
2695420968	DddP	DmdA
2838011328	DddP	DmdA
2687453745	DddP	DmdA
2724679114	DddP	DddW
2619619643	DddP	DmdA
2651870076	DddP	DmdA
2816332439	DddP	DddQ
2831806079	DddP	DmdA
2894956587	DddP	DmdA
2558309104	DddP	DmoA
2773857797	DddP	DmoA
2806310708	DddP	DmoA
2881263352	DddP	DmdA
2855043650	DddP	DmoA
2788500144	DddP	DmdA
2728369275	DddP	DmdA
2513237001	DddP	DmdA
2517572075	DddP	DmdA
2833233958	DddP	DmdA
2671180213	DddP	DmdA
2615840718	DddP	DmdA
2843173846	DddP	DmoA
2788500132	DddP	DmdA
2663763207	DddQ	DmdA
2791354896	DddQ	DmdA
2890678760	DddQ	DddW
2893710938	DddQ	DmdA
2597490221	DddQ	DmdA
2791355036	DddQ	DmdA
2713896959	DddQ	DmdA
2840899269	DddQ	DddW
2634166458	DddQ	DmdA
2843420179	DddQ	DmdA
2834207394	DddQ	DmdA
2695420938	DddQ	DmdA
2698536695	DddQ	DmdA
647533208	DddQ	DmdA
2713896965	DddW	DmdA
638341182	DddW	DmdA
2832663828	DddW	DmdA
2634166317	DddW	Tmm
2884226019	DddW	DsyB
2837583210	DddW	DsyB
2884205492	DddW	DsyB
2775506850	DddW	MmtN
2574179734	DddW	Tmm
2693429894	DddW	DsyB
2795385476	DddW	DMSOR
2739367657	DddW	DsyB
2884222058	DddW	DsyB
2675903164	DddW	DsyB
2521172622	DddW	DmdA
2565956641	DddY	DsoB
2890990593	DdhA	Tmm
647533124	DdhA	Tmm
2788500282	DdhA	Tmm
2615840719	DdhA	Tmm
640612219	DdhA	DsyB
2615840715	DdhA	DMSOR
2561511228	DmdA	Tmm
2503283017	DmdA	Tmm
2523533612	DmdA	DsyB
2561511239	DmdA	Tmm
2511231043	DmdA	Tmm
2788500137	DmdA	Tmm
641380442	DmdA	DsyB
2561511237	DmdA	Tmm
2751185909	DmdA	Tmm
2751185908	DmdA	Tmm
2503754000	DmdA	Tmm
2510461079	DmdA	Tmm
2524614677	DmdA	DsyB
2617271277	DmoA	Tmm
2597490124	DmoA	DMSOR
2791355542	DmoA	MddA
2791355580	DmoA	MddA
2791355535	DmoA	MddA
2791355543	DmoA	MddA
2718217914	DmoA	MddA
2791355602	DmoA	MddA
2791355579	DmoA	MddA
2791355578	DmoA	MddA
2791355577	DmoA	MddA
2791355536	DmoA	MddA
2687453791	DmoA	MddA
2718217915	DmoA	MddA
2558309084	DmoA	MddA
2791355551	DmoA	MddA
2791355541	DmoA	MddA
2791355603	DmoA	MddA
2791355540	DmoA	MddA
2734482291	DMSOR	DsyB
2757321003	DsyB	MmtN
2890005177	DddD	DddL	DddW
2514885042	DddD	DddP	DddQ
2895583984	DddD	DddQ	DddW
2791354910	DddD	DddP	DmdA
2840609097	DddD	DddQ	DmdA
2884647070	DddD	DddQ	DmdA
2511231042	DddK	DmdA	Tmm
2503283022	DddK	DmdA	Tmm
2511231041	DddK	DmdA	Tmm
2513237133	DddK	DmdA	Tmm
638341056	DddK	DmdA	Tmm
2516143128	DddK	DmdA	Tmm
637000058	DddK	DmdA	Tmm
2832265232	DddL	DddP	DmdA
2681813518	DddL	DddP	Tmm
2791355033	DddL	DddP	DmdA
2898659724	DddL	DddP	DmdA
2622736530	DddL	DddP	DmdA
2700988702	DddL	DddP	DmdA
2854646787	DddL	DddP	Tmm
2791354908	DddL	DddP	DmdA
2751185711	DddL	DddP	DmdA
2574180182	DddL	DddP	DmdA
2585427601	DddL	DddP	DmdA
2713896961	DddL	DddP	DmdA
2585428055	DddL	DddP	DmdA
2608642210	DddL	DddP	DmdA
2517287006	DddL	DmdA	DsyB
2698536550	DddL	DmdA	DsyB
2884508451	DddL	DmdA	DsyB
2731639218	DddL	DsyB	MmtN
2895344547	DddL	DsyB	MmtN
2808606986	DddL	DsyB	MmtN
2695421018	DddL	DddP	DmdA
2890224384	DddL	DddP	DmdA
2835529578	DddL	DddP	DmdA
2894903407	DddL	DddP	DmdA
2811995372	DddL	DmdA	DsyB
2891677541	DddL	DdhA	DsyB
2889962427	DddP	DddQ	Tmm
2891545435	DddP	DddQ	DmdA
2645727927	DddP	DddQ	DmdA
2835130448	DddP	DddQ	DmdA
2788500141	DddP	DddW	DmdA
2693429868	DddP	DmdA	Tmm
2841198529	DddP	DmdA	Tmm
639633056	DddP	DmdA	Tmm
2693429884	DddP	DmdA	Tmm
2884316459	DddP	DddQ	Tmm
647533202	DddP	DddW	DmdA
2690316282	DddP	DddQ	Tmm
2788500467	DddP	DddQ	DmdA
647533203	DddP	DddQ	Tmm
2521172619	DddP	DddQ	Tmm
2703719202	DddP	DddW	DmdA
2728369514	DddP	DddQ	DmdA
2593339277	DddP	DddW	DmdA
2889187427	DddP	DddQ	DddW
2834189540	DddP	DddQ	DddW
2645728037	DddP	DddW	DmdA
2895591741	DddP	DddW	DmdA
2893727905	DddP	DmdA	Tmm
2889986994	DddP	DddW	DmdA
2579779169	DddP	DddW	Tmm
2883117184	DddP	DmdA	MmtN
2616644822	DddQ	DddW	DmdA
638341183	DddQ	DmdA	Tmm
2713896963	DddW	DsyB	Tmm
2622736506	DddW	DsyB	Tmm
2690316342	DddD	DddP	DddQ	Tmm
2617270884	DddD	DddP	DddQ	DddW
2667527653	DddD	DddP	DddQ	Tmm
637000267	DddD	DddP	DddW	Tmm
2657244983	DddD	DddP	DddQ	Tmm
2657245004	DddD	DddP	DddQ	Tmm
2556921661	DddD	DddP	DddQ	Tmm
2667528003	DddD	DddP	DddQ	Tmm
2690316183	DddD	DddP	DddQ	Tmm
2695420551	DddD	DddP	DddQ	Tmm
2834245819	DddD	DddP	DddQ	Tmm
2521172617	DddD	DddP	DddQ	Tmm
2836636626	DddD	DddP	DddQ	Tmm
2887003593	DddD	DddL	DddP	Tmm
2791355034	DddD	DddP	DddQ	Tmm
2836641625	DddD	DddP	DddQ	Tmm
2512564009	DddD	DddP	DddQ	Tmm
2895604787	DddL	DddP	DddQ	DmdA
2700989557	DddL	DmdA	DsyB	MmtN
2890578919	DddP	DddW	DmdA	Tmm
2843432611	DddP	DddW	DsyB	Tmm
2791354926	DddP	DddW	DsyB	Tmm
2891139733	DddP	DddW	DsyB	Tmm
2828474960	DddP	DddW	DsyB	Tmm
2593339298	DddP	DddW	DsyB	Tmm
2788500142	DddP	DddW	DsyB	Tmm
2663762746	DddP	DddW	DsyB	Tmm
2830016464	DddP	DddW	DsyB	Tmm
2791354927	DddP	DddW	DsyB	Tmm
2791354915	DddP	DddW	DsyB	Tmm
2636415558	DddP	DddW	DsyB	Tmm
2512047087	DddP	DddQ	DmdA	Tmm
2690315772	DddP	DddQ	DddW	DmdA
2713896966	DddP	DddQ	DmdA	Tmm
2791354906	DddP	DddQ	DddW	DmdA
2889877346	DddP	DddQ	DmdA	Tmm
2619618997	DddL	DddQ	DmdA	DsyB	MmtN
2731957848	DddL	DddP	DddQ	DmdA	MmtN

## Sheet: Table S10
Table S10 Raw abundances of MTO in metagenomic and metatranscriptomic samples.
Data type	Sample name	Group	MTO count	Average counts of marker genes
metagenome	TARA_004_DCM_0.22-1.6	Surface	7	161.2
metagenome	TARA_004_SRF_0.22-1.6	Surface	15	149.1
metagenome	TARA_007_DCM_0.22-1.6	Surface	4	63.2
metagenome	TARA_007_SRF_0.22-1.6	Surface	6	100.1
metagenome	TARA_009_DCM_0.22-1.6	Surface	8	182.8
metagenome	TARA_009_SRF_0.22-1.6	Surface	16	160.1
metagenome	TARA_018_DCM_0.22-1.6	Surface	11	174.6
metagenome	TARA_018_SRF_0.22-1.6	Surface	10	182.3
metagenome	TARA_023_DCM_0.22-1.6	Surface	1	5.5
metagenome	TARA_023_SRF_0.22-1.6	Surface	11	94.1
metagenome	TARA_025_DCM_0.22-1.6	Surface	11	143.5
metagenome	TARA_025_SRF_0.22-1.6	Surface	14	168.2
metagenome	TARA_030_DCM_0.22-1.6	Surface	13	224.1
metagenome	TARA_030_SRF_0.22-1.6	Surface	8	162
metagenome	TARA_031_SRF_0.22-1.6	Surface	6	94.5
metagenome	TARA_032_DCM_0.22-1.6	Surface	5	124.4
metagenome	TARA_032_SRF_0.22-1.6	Surface	5	86.3
metagenome	TARA_033_SRF_0.22-1.6	Surface	9	82.3
metagenome	TARA_034_DCM_0.22-1.6	Surface	4	202.8
metagenome	TARA_034_SRF_0.22-1.6	Surface	9	69.7
metagenome	TARA_036_DCM_0.22-1.6	Surface	8	102.9
metagenome	TARA_036_SRF_0.22-1.6	Surface	7	66
metagenome	TARA_038_DCM_0.22-1.6	Surface	4	85.4
metagenome	TARA_038_SRF_0.22-1.6	Surface	4	50.8
metagenome	TARA_039_DCM_0.22-1.6	Surface	10	63.5
metagenome	TARA_041_DCM_0.22-1.6	Surface	5	117.8
metagenome	TARA_041_SRF_0.22-1.6	Surface	5	77.9
metagenome	TARA_042_DCM_0.22-1.6	Surface	8	102.7
metagenome	TARA_042_SRF_0.22-1.6	Surface	5	75.8
metagenome	TARA_045_SRF_0.22-1.6	Surface	5	79.4
metagenome	TARA_048_SRF_0.22-1.6	Surface	4	98.3
metagenome	TARA_052_DCM_0.22-1.6	Surface	5	113.2
metagenome	TARA_052_SRF_0.22-1.6	Surface	4	95.3
metagenome	TARA_056_SRF_0.22-3	Surface	7	70.2
metagenome	TARA_057_SRF_0.22-3	Surface	5	72.7
metagenome	TARA_058_DCM_0.22-3	Surface	6	81.7
metagenome	TARA_062_SRF_0.22-3	Surface	5	75
metagenome	TARA_064_DCM_0.22-3	Surface	5	78
metagenome	TARA_064_SRF_0.22-3	Surface	3	145.7
metagenome	TARA_065_DCM_0.22-3	Surface	5	69.9
metagenome	TARA_065_SRF_0.22-3	Surface	4	63.7
metagenome	TARA_066_DCM_0.22-3	Surface	1	28.8
metagenome	TARA_066_SRF_0.22-3	Surface	2	65.8
metagenome	TARA_067_SRF_0.22-0.45	Surface	3	69.4
metagenome	TARA_067_SRF_0.22-3	Surface	5	63.4
metagenome	TARA_067_SRF_0.45-0.8	Surface	10	101.4
metagenome	TARA_068_DCM_0.22-0.45	Surface	7	125
metagenome	TARA_068_DCM_0.22-3	Surface	4	53.4
metagenome	TARA_068_DCM_0.45-0.8	Surface	5	93.7
metagenome	TARA_068_SRF_0.22-0.45	Surface	2	117.1
metagenome	TARA_068_SRF_0.22-3	Surface	2	59.7
metagenome	TARA_068_SRF_0.45-0.8	Surface	7	91.7
metagenome	TARA_070_SRF_0.22-0.45	Surface	7	152.3
metagenome	TARA_070_SRF_0.22-3	Surface	1	35.7
metagenome	TARA_070_SRF_0.45-0.8	Surface	4	118.1
metagenome	TARA_072_DCM_0.22-3	Surface	8	125.7
metagenome	TARA_072_SRF_0.22-3	Surface	3	62.7
metagenome	TARA_076_DCM_0.22-0.45	Surface	4	128
metagenome	TARA_076_DCM_0.22-3	Surface	0	63.6
metagenome	TARA_076_DCM_0.45-0.8	Surface	3	80.6
metagenome	TARA_076_SRF_0.22-0.45	Surface	1	126.5
metagenome	TARA_076_SRF_0.22-3	Surface	3	29.2
metagenome	TARA_076_SRF_0.45-0.8	Surface	5	65.4
metagenome	TARA_078_DCM_0.22-0.45	Surface	6	144.2
metagenome	TARA_078_DCM_0.22-3	Surface	4	91.2
metagenome	TARA_078_DCM_0.45-0.8	Surface	3	87.1
metagenome	TARA_078_SRF_0.22-0.45	Surface	6	106.6
metagenome	TARA_078_SRF_0.22-3	Surface	8	64.6
metagenome	TARA_078_SRF_0.45-0.8	Surface	6	64.9
metagenome	TARA_082_DCM_0.22-3	Surface	17	117.2
metagenome	TARA_082_SRF_0.22-3	Surface	14	70.3
metagenome	TARA_093_DCM_0.22-3	Surface	13	130
metagenome	TARA_093_SRF_0.22-3	Surface	0	35.7
metagenome	TARA_094_SRF_0.22-3	Surface	14	230.3
metagenome	TARA_096_SRF_0.22-3	Surface	8	113.4
metagenome	TARA_098_DCM_0.22-3	Surface	4	105.1
metagenome	TARA_098_SRF_0.22-3	Surface	3	78.3
metagenome	TARA_099_SRF_0.22-3	Surface	5	106.9
metagenome	TARA_100_DCM_0.22-3	Surface	7	178.5
metagenome	TARA_100_MES_0.22-3	Surface	1	122.2
metagenome	TARA_100_SRF_0.22-3	Surface	7	146.9
metagenome	TARA_102_DCM_0.22-3	Surface	9	155.2
metagenome	TARA_102_SRF_0.22-3	Surface	7	131.7
metagenome	TARA_109_DCM_0.22-3	Surface	3	88.2
metagenome	TARA_109_SRF_0.22-3	Surface	1	11.1
metagenome	TARA_110_DCM_0.22-3	Surface	4	109.6
metagenome	TARA_110_SRF_0.22-3	Surface	3	89.9
metagenome	TARA_111_DCM_0.22-3	Surface	8	206.8
metagenome	TARA_111_SRF_0.22-3	Surface	4	147
metagenome	TARA_112_DCM_0.22-3	Surface	1	129.7
metagenome	TARA_112_SRF_0.22-3	Surface	7	121.5
metagenome	TARA_122_DCM_0.22-0.45	Surface	3	230.2
metagenome	TARA_122_DCM_0.22-3	Surface	3	219.3
metagenome	TARA_122_DCM_0.45-0.8	Surface	3	139
metagenome	TARA_122_SRF_0.22-0.45	Surface	1	64.1
metagenome	TARA_122_SRF_0.22-3	Surface	5	86.8
metagenome	TARA_122_SRF_0.45-0.8	Surface	3	75.9
metagenome	TARA_123_MIX_0.22-0.45	Surface	2	194.1
metagenome	TARA_123_MIX_0.22-3	Surface	2	237.6
metagenome	TARA_123_MIX_0.45-0.8	Surface	0	29.6
metagenome	TARA_123_SRF_0.22-0.45	Surface	3	125.5
metagenome	TARA_123_SRF_0.22-3	Surface	4	98.9
metagenome	TARA_123_SRF_0.45-0.8	Surface	7	118.2
metagenome	TARA_124_MIX_0.22-0.45	Surface	6	178.1
metagenome	TARA_124_MIX_0.22-3	Surface	6	191.4
metagenome	TARA_124_MIX_0.45-0.8	Surface	5	149.9
metagenome	TARA_124_SRF_0.22-0.45	Surface	4	127.6
metagenome	TARA_124_SRF_0.22-3	Surface	6	199.9
metagenome	TARA_124_SRF_0.45-0.8	Surface	0	99.8
metagenome	TARA_125_MIX_0.22-0.45	Surface	4	160.1
metagenome	TARA_125_MIX_0.22-3	Surface	4	262
metagenome	TARA_125_MIX_0.45-0.8	Surface	6	112.1
metagenome	TARA_125_SRF_0.22-0.45	Surface	7	295.6
metagenome	TARA_125_SRF_0.22-3	Surface	6	145.7
metagenome	TARA_125_SRF_0.45-0.8	Surface	1	171.1
metagenome	TARA_128_DCM_0.22-3	Surface	3	98.7
metagenome	TARA_128_SRF_0.22-3	Surface	3	82.7
metagenome	TARA_132_DCM_0.22-3	Surface	7	145.6
metagenome	TARA_132_SRF_0.22-3	Surface	7	106.1
metagenome	TARA_133_DCM_0.22-3	Surface	13	119.9
metagenome	TARA_133_SRF_0.22-3	Surface	11	199.8
metagenome	TARA_137_DCM_0.22-3	Surface	0	99.6
metagenome	TARA_137_SRF_0.22-3	Surface	5	95
metagenome	TARA_138_DCM_0.22-3	Surface	5	114.1
metagenome	TARA_138_SRF_0.22-3	Surface	3	86.7
metagenome	TARA_140_SRF_0.22-3	Surface	7	96.5
metagenome	TARA_141_SRF_0.22-3	Surface	12	110.8
metagenome	TARA_142_DCM_0.22-3	Surface	3	137.7
metagenome	TARA_142_SRF_0.22-3	Surface	2	151.8
metagenome	TARA_145_SRF_0.22-3	Surface	11	146.2
metagenome	TARA_146_SRF_0.22-3	Surface	5	147.1
metagenome	TARA_148_SRF_0.22-3	Surface	13	141.8
metagenome	TARA_149_SRF_0.22-3	Surface	7	119.6
metagenome	TARA_150_DCM_0.22-3	Surface	4	116.9
metagenome	TARA_150_SRF_0.22-3	Surface	6	110.5
metagenome	TARA_151_DCM_0.22-3	Surface	5	126.1
metagenome	TARA_151_SRF_0.22-3	Surface	5	137.4
metagenome	TARA_152_MIX_0.22-3	Surface	6	137
metagenome	TARA_152_SRF_0.22-3	Surface	7	122.7
metagenome	TARA_037_MES_0.22-1.6	Deep	0	90.5
metagenome	TARA_038_MES_0.22-1.6	Deep	0	49.7
metagenome	TARA_039_MES_0.22-1.6	Deep	0	64.9
metagenome	TARA_056_MES_0.22-3	Deep	0	67.2
metagenome	TARA_064_MES_0.22-3	Deep	0	41
metagenome	TARA_065_MES_0.22-3	Deep	0	65.4
metagenome	TARA_068_MES_0.22-3	Deep	1	72.4
metagenome	TARA_068_MES_0.45-0.8	Deep	0	76.7
metagenome	TARA_070_MES_0.22-0.45	Deep	0	50.9
metagenome	TARA_070_MES_0.22-3	Deep	0	62.6
metagenome	TARA_070_MES_0.45-0.8	Deep	0	74.9
metagenome	TARA_072_MES_0.22-3	Deep	1	49.7
metagenome	TARA_076_MES_0.22-3	Deep	0	73.2
metagenome	TARA_076_MES_0.45-0.8	Deep	0	74.5
metagenome	TARA_078_MES_0.22-3	Deep	0	70.5
metagenome	TARA_078_MES_0.45-0.8	Deep	0	60.4
metagenome	TARA_098_MES_0.22-3	Deep	1	72
metagenome	TARA_102_MES_0.22-3	Deep	3	81.7
metagenome	TARA_109_MES_0.22-3	Deep	2	72.9
metagenome	TARA_110_MES_0.22-3	Deep	0	29.2
metagenome	TARA_111_MES_0.22-3	Deep	2	74.9
metagenome	TARA_112_MES_0.22-3	Deep	1	76.9
metagenome	TARA_122_MES_0.22-0.45	Deep	2	66
metagenome	TARA_122_MES_0.22-3	Deep	1	87.5
metagenome	TARA_122_MES_0.45-0.8	Deep	1	56.1
metagenome	TARA_132_MES_0.22-3	Deep	1	77.5
metagenome	TARA_133_MES_0.22-3	Deep	1	79.2
metagenome	TARA_137_MES_0.22-3	Deep	0	95
metagenome	TARA_138_MES_0.22-3	Deep	0	86.1
metagenome	TARA_142_MES_0.22-3	Deep	1	62.7
metagenome	TARA_145_MES_0.22-3	Deep	1	75
metagenome	TARA_146_MES_0.22-3	Deep	0	45.8
metagenome	TARA_148b_MES_0.22-3	Deep	0	109.4
metagenome	TARA_149_MES_0.22-3	Deep	1	56.9
metagenome	TARA_152_MES_0.22-3	Deep	1	71.3
metagenome	N02#G02-7Ar	Arctic-Surface	17	116.4
metagenome	N05#K3-8Ar	Arctic-Surface	8	77.5
metagenome	N06#UW022-8Ar	Arctic-Surface	10	120.7
metagenome	N07#UW023-8Ar	Arctic-Surface	13	114.7
metagenome	N08#N07-0m-8Ar	Arctic-Surface	14	92.5
metagenome	N15#BB08-0m-8Ar	Arctic-Surface	5	114.4
metagenome	N19#AT04-0m-8Ar	Arctic-Surface	6	133.1
metagenome	N20#P06-0m-8Ar	Arctic-Surface	17	86.7
metagenome	N22#N04-0m-8Ar	Arctic-Surface	18	151.1
metagenome	N25#N02-0m-8Ar	Arctic-Surface	14	133.1
metagenome	N28#B08-0m-8Ar	Arctic-Surface	30	135.5
metagenome	N38#UW012-0m-8Ar	Arctic-Surface	24	69.6
metagenome	N40#ICE04-0m-9Ar	Arctic-Surface	16	103.1
metagenome	N47#UW024-9Ar	Arctic-Surface	23	133.4
metagenome	N35#LB01-5m-8Ar	Arctic-Surface	22	96.3
metagenome	N41#ICE04-100m-9Ar	Arctic-Surface	4	115.8
metagenome	S05#UW048-33An	Antarctic-Surface	17	94.3
metagenome	S06#UW051-33An	Antarctic-Surface	6	73.7
metagenome	S07#UW056-33An	Antarctic-Surface	7	86.7
metagenome	S08#UW064-33An	Antarctic-Surface	16	129.8
metagenome	S09#UW072-33An	Antarctic-Surface	15	91
metagenome	S10#UW073-33An	Antarctic-Surface	14	105.1
metagenome	S14#A4-07-0m-34An	Antarctic-Surface	6	91.4
metagenome	S15#A5-10-0m-34An	Antarctic-Surface	24	142.6
metagenome	S19#A3-09-0m-34An	Antarctic-Surface	22	145.1
metagenome	S30#UW050-0m-34An	Antarctic-Surface	19	121.1
metagenome	S31#UW044-0m-34An	Antarctic-Surface	18	134.8
metagenome	S32#UW042-0m-34An	Antarctic-Surface	14	103.7
metagenome	N09#N07-300m-8Ar	Arctic-Deep	12	131
metagenome	N13#BB08-300m-8Ar	Arctic-Deep	23	104.2
metagenome	N18#AT04-300m-8Ar	Arctic-Deep	5	118.5
metagenome	N21#P06-300m-8Ar	Arctic-Deep	7	124.3
metagenome	N23#N04-300m-8Ar	Arctic-Deep	8	145
metagenome	N36#LB01-300m-8Ar	Arctic-Deep	7	112
metagenome	N44#R16E-300m-9Ar	Arctic-Deep	5	124.8
metagenome	N26#N02-500m-8Ar	Arctic-Deep	4	141.8
metagenome	N10#N07-1000m-8Ar	Arctic-Deep	6	145.2
metagenome	N12#BB08-1000m-8Ar	Arctic-Deep	10	66.9
metagenome	N16#AT04-1000m-8Ar	Arctic-Deep	18	87.7
metagenome	N29#B08-1000m-8Ar	Arctic-Deep	31	141.9
metagenome	N37#LB01-1000m-8Ar	Arctic-Deep	3	96.3
metagenome	N42#ICE04-1000m-9Ar	Arctic-Deep	12	111.3
metagenome	N45#R16E-1000m-9Ar	Arctic-Deep	11	117.1
metagenome	N27#N02-1500m-8Ar	Arctic-Deep	3	137.9
metagenome	N43#ICE04-2280m-9Ar	Arctic-Deep	17	117
metagenome	N17#AT04-3000m-8Ar	Arctic-Deep	15	152.1
metagenome	N30#B08-3200m-8Ar	Arctic-Deep	4	136.3
metagenome	N46#R16E-3236m-9Ar	Arctic-Deep	11	94.6
metagenome	N14#BB08-3300m-8Ar	Arctic-Deep	13	131.7
metagenome	N11#N07-3800m-8Ar	Arctic-Deep	9	156.1
metagenome	N24#N04-3800m-8Ar	Arctic-Deep	13	156.3
metagenome	S11#A4-07-300m-34An	Antarctic-Deep	19	105.3
metagenome	S16#A5-10-300m-34An	Antarctic-Deep	12	122.7
metagenome	S20#A3-09-300m-34An	Antarctic-Deep	10	136.2
metagenome	S12#A4-07-1000m-34An	Antarctic-Deep	14	132.8
metagenome	S17#A5-10-1000m-34An	Antarctic-Deep	18	149.3
metagenome	S21#A3-09-1000m-34An	Antarctic-Deep	8	119.3
metagenome	S13#A4-07-3000m-34An	Antarctic-Deep	7	120
metagenome	S18#A5-10-3500m-34An	Antarctic-Deep	6	130.7
metagenome	S22#A3-09-3500m-34An	Antarctic-Deep	5	115.4
metatranscriptome	3300000368	Non-polar-surface	5	0
metatranscriptome	3300003149	Non-polar-surface	0	1.3
metatranscriptome	3300004636	Non-polar-surface	4	10.1
metatranscriptome	3300004637	Non-polar-surface	1	6.5
metatranscriptome	3300004638	Non-polar-surface	1	12.3
metatranscriptome	3300004639	Non-polar-surface	6	14.4
metatranscriptome	3300004640	Non-polar-surface	1	13.9
metatranscriptome	3300004642	Non-polar-surface	7	17.1
metatranscriptome	3300004954	Non-polar-surface	2	0.3
metatranscriptome	3300004957	Non-polar-surface	1	0.1
metatranscriptome	3300004958	Non-polar-surface	1	1.2
metatranscriptome	3300004960	Non-polar-surface	4	0.7
metatranscriptome	3300004962	Non-polar-surface	11	0.7
metatranscriptome	3300004968	Non-polar-surface	0	14.1
metatranscriptome	3300004975	Non-polar-surface	16	7.3
metatranscriptome	3300005233	Non-polar-surface	2	16.6
metatranscriptome	3300005234	Non-polar-surface	18	13.5
metatranscriptome	3300018539	Non-polar-surface	0	0
metatranscriptome	3300018540	Non-polar-surface	0	0
metatranscriptome	3300018541	Non-polar-surface	0	0
metatranscriptome	3300018542	Non-polar-surface	0	0.1
metatranscriptome	3300018544	Non-polar-surface	0	0.1
metatranscriptome	3300018547	Non-polar-surface	0	0.1
metatranscriptome	3300018548	Non-polar-surface	0	0.7
metatranscriptome	3300018549	Non-polar-surface	0	0
metatranscriptome	3300018550	Non-polar-surface	0	0.2
metatranscriptome	3300018551	Non-polar-surface	0	0.3
metatranscriptome	3300018552	Non-polar-surface	0	0
metatranscriptome	3300018553	Non-polar-surface	0	0.4
metatranscriptome	3300018554	Non-polar-surface	0	0.1
metatranscriptome	3300018557	Non-polar-surface	0	0
metatranscriptome	3300018558	Non-polar-surface	0	0.4
metatranscriptome	3300018559	Non-polar-surface	1	0
metatranscriptome	3300018560	Non-polar-surface	0	1.2
metatranscriptome	3300018561	Non-polar-surface	0	0
metatranscriptome	3300018563	Non-polar-surface	0	0.5
metatranscriptome	3300018565	Non-polar-surface	0	0.2
metatranscriptome	3300018567	Non-polar-surface	0	0
metatranscriptome	3300018569	Non-polar-surface	2	4.1
metatranscriptome	3300018572	Non-polar-surface	3	3.6
metatranscriptome	3300018574	Non-polar-surface	0	0.1
metatranscriptome	3300018599	Non-polar-surface	0	0.7
metatranscriptome	3300018601	Non-polar-surface	1	0.2
metatranscriptome	3300018610	Non-polar-surface	4	0.8
metatranscriptome	3300018613	Non-polar-surface	0	1.9
metatranscriptome	3300018614	Non-polar-surface	0	0.5
metatranscriptome	3300018619	Non-polar-surface	0	4.7
metatranscriptome	3300018622	Non-polar-surface	0	0
metatranscriptome	3300018629	Non-polar-surface	0	3.1
metatranscriptome	3300018632	Non-polar-surface	4	2.9
metatranscriptome	3300018633	Non-polar-surface	7	1.4
metatranscriptome	3300018640	Non-polar-surface	0	1.7
metatranscriptome	3300018642	Non-polar-surface	4	2.1
metatranscriptome	3300018665	Non-polar-surface	7	2.4
metatranscriptome	3300018682	Non-polar-surface	1	22
metatranscriptome	3300018687	Non-polar-surface	2	2.1
metatranscriptome	3300018775	Non-polar-surface	4	8.7
metatranscriptome	3300018824	Non-polar-surface	8	4
metatranscriptome	3300019056	Non-polar-surface	0	0
metatranscriptome	3300019059	Non-polar-surface	2	0
metatranscriptome	3300019060	Non-polar-surface	0	0.2
metatranscriptome	3300019062	Non-polar-surface	0	0
metatranscriptome	3300019063	Non-polar-surface	0	0
metatranscriptome	3300019064	Non-polar-surface	0	0
metatranscriptome	3300019066	Non-polar-surface	0	0
metatranscriptome	3300019073	Non-polar-surface	0	0.7
metatranscriptome	3300019076	Non-polar-surface	1	0
metatranscriptome	3300019077	Non-polar-surface	0	0.2
metatranscriptome	3300019081	Non-polar-surface	0	0.3
metatranscriptome	3300019083	Non-polar-surface	0	0
metatranscriptome	3300019085	Non-polar-surface	0	0
metatranscriptome	3300019089	Non-polar-surface	2	3.2
metatranscriptome	3300019095	Non-polar-surface	2	0.8
metatranscriptome	3300019096	Non-polar-surface	0	15.7
metatranscriptome	3300019098	Non-polar-surface	7	2.1
metatranscriptome	3300019113	Non-polar-surface	0	0.1
metatranscriptome	3300019114	Non-polar-surface	6	3.7
metatranscriptome	3300019122	Non-polar-surface	1	20.1
metatranscriptome	3300019146	Non-polar-surface	1	4.9
metatranscriptome	3300019149	Non-polar-surface	3	2.4
metatranscriptome	3300028671	Non-polar-surface	35	25.6
metatranscriptome	3300028672	Non-polar-surface	58	29.7
metatranscriptome	3300031056	Non-polar-surface	3	3.1
metatranscriptome	3300031113	Non-polar-surface	0	5.8
metatranscriptome	3300031121	Non-polar-surface	5	5.1
metatranscriptome	3300004627	Non-polar-Deep	0	8.6
metatranscriptome	3300004641	Non-polar-Deep	1	11.5
metatranscriptome	3300004974	Non-polar-Deep	3	10.2
metatranscriptome	3300018570	Non-polar-Deep	0	1.7
metatranscriptome	3300018573	Non-polar-Deep	0	2.6
metatranscriptome	3300018595	Non-polar-Deep	0	1.8
metatranscriptome	3300018620	Non-polar-Deep	0	3
metatranscriptome	3300018624	Non-polar-Deep	0	2.4
metatranscriptome	3300018843	Non-polar-Deep	3	2.9
metatranscriptome	3300019072	Non-polar-Deep	0	2
metatranscriptome	3300019090	Non-polar-Deep	0	2.8
metatranscriptome	3300019110	Non-polar-Deep	0	7
metatranscriptome	3300029637	Non-polar-Deep	14	0.5
metatranscriptome	3300029645	Non-polar-Deep	4	0.6
metatranscriptome	3300012413	Polar-surface	43	40.3
metatranscriptome	3300012414	Polar-surface	19	42
metatranscriptome	3300012415	Polar-surface	17	46
metatranscriptome	3300012767	Polar-surface	10	10.6
metatranscriptome	3300012782	Polar-surface	19	32.5
metatranscriptome	3300012935	Polar-surface	40	43.5
metatranscriptome	3300030715	Polar-surface	16	6.7
metatranscriptome	3300030720	Polar-surface	9	9.1
metatranscriptome	3300030721	Polar-surface	16	8.3
metatranscriptome	3300030722	Polar-surface	27	15.3
metatranscriptome	3300030723	Polar-surface	11	3.1
metatranscriptome	3300030724	Polar-surface	20	10.6
metatranscriptome	3300030725	Polar-surface	13	5.7
metatranscriptome	3300030726	Polar-surface	20	13.1
metatranscriptome	3300030728	Polar-surface	12	26.1
metatranscriptome	3300030729	Polar-surface	12	20.8
metatranscriptome	3300031340	Polar-surface	15	11.4
metatranscriptome	3300031378	Polar-surface	11	8.1
metatranscriptome	3300031540	Polar-surface	24	8.5
metatranscriptome	3300031542	Polar-surface	30	10.4
metatranscriptome	3300031556	Polar-surface	35	15.3
metatranscriptome	3300031557	Polar-surface	36	7.8
metatranscriptome	3300031558	Polar-surface	34	8.7
metatranscriptome	3300031570	Polar-surface	24	13.3
metatranscriptome	3300031571	Polar-surface	10	14.3
metatranscriptome	3300031579	Polar-surface	15	19.9
metatranscriptome	3300031580	Polar-surface	27	21.7
metatranscriptome	3300031581	Polar-surface	23	15.8
metatranscriptome	3300035288	Polar-surface	84	22.6
metatranscriptome	3300035290	Polar-surface	126	41.8
metatranscriptome	3300035291	Polar-surface	95	28.5
metatranscriptome	3300035292	Polar-surface	86	41.1
metatranscriptome	3300035293	Polar-surface	95	41.6
metatranscriptome	3300035294	Polar-surface	79	29.1
metatranscriptome	3300035406	Polar-surface	82	31
metatranscriptome	3300035439	Polar-surface	122	47.4
metatranscriptome	3300035440	Polar-surface	87	40.5
metatranscriptome	3300035441	Polar-surface	117	42.8
metatranscriptome	3300035442	Polar-surface	91	44.6
metatranscriptome	3300035443	Polar-surface	119	57.1
metatranscriptome	3300035444	Polar-surface	103	49.1
metatranscriptome	3300035555	Polar-surface	83	30.5
metatranscriptome	3300030727	Polar-Deep	14	11.7
metatranscriptome	3300031496	Polar-Deep	8	9.7
metatranscriptome	3300031559	Polar-Deep	14	16.8
metatranscriptome	3300032127	Polar-Deep	5	31.6
metatranscriptome	3300032145	Polar-Deep	4	35.6
metatranscriptome	3300032146	Polar-Deep	10	17.3
metatranscriptome	3300032149	Polar-Deep	2	17.7
metatranscriptome	3300032161	Polar-Deep	4	9.4
metatranscriptome	3300034481	Polar-Deep	1	1.9
metatranscriptome	3300034679	Polar-Deep	4	19.6
